# Supplementary material for: Single dose primaquine to reduce gametocyte carriage and Plasmodium falciparum transmission in Cambodia: An open-label randomized trial
Source: PubMed Central journal article supplement (PMC5462369; doi:10.1371/journal.pone.0168702), 2017-06-07
Supplement: pone.0168702.s004.pdf [file pone.0168702.s004.pdf]

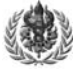

1  
2  
3  
4  
5  
6  
7  
8  
9  
10  
11  
12  
13  
14  
15  
16  
17  
18  
19  
20  
21  
22  
23  
24  
25

**Title: Active surveillance for *P. falciparum* drug resistance with assessment of transmission blocking activity of single dose primaquine in Cambodia**

**WRAIR Protocol Number:**  
*WRAIR # 1877*  
*HRPO Log Number A-17145*

**Principal Investigators:**  
LTC David Saunders, USAMC-AFRIMS  
Dr. Youry Se, USAMC-AFRIMS

**Version Number:** *Version 2.3*  
*7 Sep 2012*

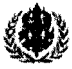

WRAIR Institutional Review Board (IRB)  
Signature Page for Studies Not Exempt Under 32 CFR 219

26  
27  
28  
29  
30  
31  
32  
33  
34  
35  
36  
37  
38  
39  
40  
41  
42  
43  
44  
45  
46  
47  
48  
49  
50  
51  
52  
53  
54  
55  
56  
57  
58  
59  
60  
61  
62  
63  
64  
65  
66  
67  
68  
69  
70  
71  
72  
73  
74

Principal Investigator Agreement:

1. I agree to follow this protocol version as approved by the IRBs/ERCs.
2. I will conduct the study in accordance with applicable IRB/ERC requirements, Federal regulations, and state and local laws to maintain the protection of the rights and welfare of study participants.
3. I certify that I, and the study staff, have received the requisite training to conduct this research protocol.
4. I will not modify the protocol without first obtaining an IRB/ERC approved amendment and new protocol version unless it is necessary to protect the health and welfare of study participants.
5. (For Greater than Minimal Risk studies or studies of public interest) In accordance with Command Policy 2008-35, I will ensure that the Commanding General receives a pre-brief (or Executive Summary) and approves the study prior to execution.
6. I will ensure that the data (and/or specimens) are maintained in accordance with the data (and/or specimen) disposition outlined in the protocol. Any modifications to this plan should first be reviewed and approved by the applicable IRBs/ERCs.
7. I will promptly report changes to the research or unanticipated problems to the WRAIR IRB immediately via the WRAIR Division of Human Subjects Protection at (301) 319-9940 (during duty hours) or to the WRAIRHSPB@amedd.army.mil and submit a written report within 10 working days of knowledge of the event.
8. I will prepare continuing review reports at an interval established by the IRB/ERC, and a study closure report when all research activities are completed.
9. I will immediately report to the WRAIR Division of Human Subjects Protection knowledge of any pending compliance inspection by any outside governmental agency.
10. I agree to maintain adequate and accurate records in accordance with IRB policies, Federal, state and local laws and regulations.

\_\_\_\_\_  
Dr. Youry Se

\_\_\_\_\_  
Date

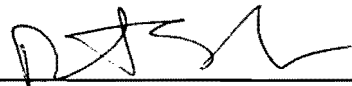  
\_\_\_\_\_  
Dr. David Saunders

07-Sept-2012  
Date

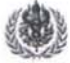

WRAIR Institutional Review Board (IRB)  
Signature Page for Studies Not Exempt Under 32 CFR 219

26  
27  
28  
29  
30  
31  
32  
33  
34  
35  
36  
37  
38  
39  
40  
41  
42  
43  
44  
45  
46  
47  
48  
49  
50  
51  
52  
53  
54  
55  
56  
57  
58  
59  
60  
61  
62  
63  
64  
65  
66  
67  
68  
69  
70  
71  
72  
73  
74

Principal Investigator Agreement:

1. I agree to follow this protocol version as approved by the IRBs/ERCs.
2. I will conduct the study in accordance with applicable IRB/ERC requirements, Federal regulations, and state and local laws to maintain the protection of the rights and welfare of study participants.
3. I certify that I, and the study staff, have received the requisite training to conduct this research protocol.
4. I will not modify the protocol without first obtaining an IRB/ERC approved amendment and new protocol version unless it is necessary to protect the health and welfare of study participants.
5. (For Greater than Minimal Risk studies or studies of public interest) In accordance with Command Policy 2008-35, I will ensure that the Commanding General receives a pre-brief (or Executive Summary) and approves the study prior to execution.
6. I will ensure that the data (and/or specimens) are maintained in accordance with the data (and/or specimen) disposition outlined in the protocol. Any modifications to this plan should first be reviewed and approved by the applicable IRBs/ERCs.
7. I will promptly report changes to the research or unanticipated problems to the WRAIR IRB immediately via the WRAIR Division of Human Subjects Protection at (301) 319-9940 (during duty hours) or to the WRAIRHSPB@amedd.army.mil and submit a written report within 10 working days of knowledge of the event.
8. I will prepare continuing review reports at an interval established by the IRB/ERC, and a study closure report when all research activities are completed.
9. I will immediately report to the WRAIR Division of Human Subjects Protection knowledge of any pending compliance inspection by any outside governmental agency.
10. I agree to maintain adequate and accurate records in accordance with IRB policies, Federal, state and local laws and regulations.

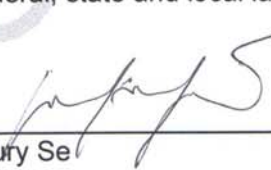  
\_\_\_\_\_  
Dr. Youry Se

07. SEP. 2012  
\_\_\_\_\_  
Date

\_\_\_\_\_  
Dr. David Saunders

\_\_\_\_\_  
Date

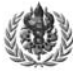

75  
76  
77

## List of Abbreviations

|          |                                                                  |
|----------|------------------------------------------------------------------|
| A        | Artesunate                                                       |
| ACPR     | Adequate Clinical and Parasitologic Response                     |
| ACT      | Artemisinin-based Combination Therapy                            |
| AE       | Adverse event                                                    |
| AFRIMS   | Armed Forces Research Institute of Medical Sciences              |
| AI       | Associate Investigator                                           |
| CBC      | Complete Blood Count                                             |
| CFR      | Common Federal Rule                                              |
| CNM      | National Center for Parasitology, Entomology and Malaria Control |
| CRADA    | Cooperative Research and Development Agreement                   |
| CRF      | Case Report Form                                                 |
| DHA      | Dihydroartemisinin                                               |
| DoD-GEIS | Department of Defense-Geographic Epidemiologic                   |
| DP       | Dihydroartemisinin-piperaquine                                   |
| DNA      | Deoxyribonucleic Acid                                            |
| DOT      | Directly Observed Therapy                                        |
| DP       | Dihydroartemisinin-piperaquine                                   |
| EDTA     | Ethylenediaminetetraacetic acid                                  |
| EKG      | electrocardiogram                                                |
| ELISA    | Enzyme-Linked Immunosorbent Assay                                |
| EMEA     | Europe Medicines Agency                                          |
| ETF      | Early Treatment Failure                                          |
| FDA      | Food and Drug Administration                                     |
| FWA      | Federal-Wide Assurance                                           |
| GCP      | Good Clinical Practice                                           |
| G6PD     | Glucose-6-phosphate dehydrogenase                                |
| GMP      | Good Manufacturing Practice                                      |
| GPO      | Government Pharmaceutical Organization                           |
| HRP      | Histidine Rich Protein                                           |
| HRPO     | Human Research Protection Office                                 |
| HSPB     | Human Subjects Protection Branch                                 |
| IC       | Inhibitory Concentration                                         |
| ICF      | Informed Consent Form                                            |
| ICH      | International Conference on Harmonization                        |
| IEC      | Independent or Institutional Ethics Committee                    |
| IND      | Investigational New Drug application                             |
| IRB      | Institutional Review Board                                       |
| LCF      | Late Clinical Failure                                            |
| LC-MS    | Liquid Chromatography-Mass Spectrometry                          |
| LD       | Linkage Disequilibrium                                           |
| LPF      | Late Parasitologic Failure                                       |
| M        | Mefloquine                                                       |
| MMV      | Medicines for Malaria Venture                                    |
| MR4      | Malaria Research and Reference Reagent Resource Center           |
| MSP      | Merozoite Surface Protein                                        |
| MTF      | Malaria Treatment Facility                                       |
| NADPH    | Nicotinamide adenine dinucleotide phosphate                      |



|                                   |                                                          |
|-----------------------------------|----------------------------------------------------------|
| NDA                               | New Drug Application                                     |
| NEHCR                             | Cambodia National Ethics Committee for Health Research   |
| ORP                               | Office of Research Protection                            |
| QA                                | Quality Assurance                                        |
| QC                                | Quality control                                          |
| QT <sub>C</sub> , QT <sub>F</sub> | Correction methods of EKG QT intervals using heart rate  |
| RBC                               | Red Blood Cell                                           |
| P.                                | <i>Plasmodium</i>                                        |
| PCR                               | Polymerase chain reaction                                |
| PCT                               | Parasite Clearance Time                                  |
| Pf                                | <i>Plasmodium falciparum</i>                             |
| PQ                                | Primaquine                                               |
| Pv                                | <i>Plasmodium vivax</i>                                  |
| RCAF                              | Royal Cambodian Armed Forces                             |
| RNA                               | Ribonucleic Acid                                         |
| SAE                               | Serious Adverse Event                                    |
| SOP                               | Standard Operating Procedure                             |
| SP                                | Sulfadoxine-pyrimethamine                                |
| SSP                               | Study Specific Procedure                                 |
| UIC                               | Unique Identifier Code                                   |
| UNC                               | University of North Carolina                             |
| USAMRMC                           | United States Army Medical Research and Materiel Command |
| USAMRU-K                          | United States Army Medical Research Unit-Kenya           |
| US FDA                            | United State Food and Drug Administration                |
| UV                                | Ultraviolet                                              |
| WBC                               | White Blood Cell                                         |
| WGA                               | Whole Genome Analysis                                    |
| WHO                               | World Health Organization                                |
| WWARN                             | Worldwide Antimalarial Resistance Network                |

78  
79  
80



81 **Table of Contents**

82

83 Appendices ..... 7

84 1 PROJECT SUMMARY ..... 8

85 2 KEY ROLES ..... 12

86 3 BACKGROUND AND RATIONALE ..... 19

87 3.1 Introduction ..... 19

88 3.2 Malaria in Cambodia ..... 20

89 3.2.1 Access, availability and cost of medical care in Cambodia ..... 20

90 3.2.2 Malaria Epidemiology ..... 20

91 3.2.3 Trends in artemisinin resistance in Cambodia ..... 21

92 3.3 Dihydroartemisinin-piperaquine ..... 22

93 3.4 Primaquine ..... 25

94 3.4.1 Primaquine in G6PD deficiency ..... 28

95 3.5 Mosquito infection by membrane feeding ..... 30

96 4 STUDY OBJECTIVES ..... 32

97 4.1 Primary Objectives ..... 32

98 4.2 Secondary Objectives: ..... 32

99 5 STUDY DESIGN ..... 34

100 5.1 Overview ..... 34

101 5.2 Endpoints ..... 34

102 5.3 Sample Size ..... 36

103 5.4 Duration of Volunteer Participation ..... 36

104 5.5 Study Group Descriptions ..... 37

105 5.6 Population to be Studied ..... 37

106 5.7 Study Sites and Selection of the Study Population ..... 37

107 5.7.1 Population Characteristics ..... 37

108 5.8 Description of Test Article ..... 38

109 5.8.1 Packaging and Labeling of the Test Articles ..... 38

110 5.8.2 Storage of Test Articles ..... 38

111 5.9 Monitoring of Clinical Subject Safety ..... 39

112 6 METHODS ..... 41

113 6.1 Recruitment of Study Volunteers ..... 41

114 6.2 Informed Consent Process ..... 41

115 6.3 Determination of Eligibility ..... 42

116 6.3.1 Inclusion Criteria ..... 42

117 6.3.2 Exclusion Criteria ..... 43

118 6.4 Screening Procedures ..... 45

119 6.5 Randomization and Volunteer Assignment ..... 45

120 6.6 Blinding ..... 46

121 6.7 Administration of Test Article ..... 46

122 6.8 Concomitant Medications ..... 47

123 6.9 Clinical Assessments ..... 47

124 6.10 Specimen (or Data) Collection and Testing ..... 52

125 6.10.1 Specimens to be Collected ..... 52

126 6.10.2 Specimen Preparation, Processing, Handling, and Storage ..... 53

127 6.10.3 Specimen Labeling and Shipment ..... 57



|     |        |                                                                 |    |
|-----|--------|-----------------------------------------------------------------|----|
| 128 | 6.10.4 | Specimen Storage and Donation for Future Use .....              | 57 |
| 129 | 6.11   | Data Management .....                                           | 58 |
| 130 | 6.11.1 | Source Documents .....                                          | 59 |
| 131 | 6.11.2 | Overview of Case Report Forms .....                             | 59 |
| 132 | 6.11.3 | Data Compilation .....                                          | 60 |
| 133 | 6.11.4 | Disposition of Data .....                                       | 60 |
| 134 | 6.12   | Adverse Events .....                                            | 60 |
| 135 | 6.12.1 | Collecting Adverse Events .....                                 | 61 |
| 136 | 6.12.2 | Documenting Adverse Events .....                                | 62 |
| 137 | 6.12.3 | Expected Adverse Events .....                                   | 62 |
| 138 | 6.12.4 | Serious Adverse Events and Unanticipated Problems .....         | 63 |
| 139 | 6.12.5 | Adverse Event Reporting .....                                   | 64 |
| 140 | 6.12.6 | Follow-up of Adverse Events .....                               | 65 |
| 141 | 6.13   | Criteria for Discontinuation or Withdrawal of a Subject .....   | 66 |
| 142 | 6.13.1 | Halting Rules Criteria .....                                    | 67 |
| 143 | 6.14   | Rescue Treatment for Malaria Infection .....                    | 67 |
| 144 | 6.15   | Criteria for Study Termination .....                            | 68 |
| 145 | 6.16   | Quality Control and Quality Assurance .....                     | 68 |
| 146 | 7      | STATISTICAL METHODS .....                                       | 69 |
| 147 | 7.1    | Statistical Procedures .....                                    | 69 |
| 148 | 7.1.1  | Sample Size Estimation .....                                    | 69 |
| 149 | 7.1.2  | Randomization and Stratification .....                          | 70 |
| 150 | 7.1.3  | Populations for Analysis .....                                  | 70 |
| 151 | 7.1.4  | Deviations from the Statistical Plan .....                      | 70 |
| 152 | 8      | DATA ANALYSIS .....                                             | 71 |
| 153 | 8.1    | General Considerations – Data Analysis .....                    | 71 |
| 154 | 8.2    | Efficacy Study Analysis .....                                   | 71 |
| 155 | 8.3    | Pharmacokinetic Analysis .....                                  | 72 |
| 156 | 8.4    | Parasite drug resistance in vitro .....                         | 73 |
| 157 | 8.5    | Molecular Markers of Parasite Resistance .....                  | 73 |
| 158 | 8.6    | Safety Analysis .....                                           | 75 |
| 159 | 8.7    | Interim Analysis .....                                          | 75 |
| 160 | 9      | ETHICAL CONSIDERATIONS .....                                    | 76 |
| 161 | 9.1    | Informed Consent .....                                          | 76 |
| 162 | 9.2    | Volunteer Identification and Confidentiality .....              | 76 |
| 163 | 9.3    | Data Management .....                                           | 77 |
| 164 | 9.4    | Risk to Volunteers and Precautions to Minimize Risk .....       | 78 |
| 165 | 9.5    | Alternatives to Test Article (or Research Treatment) .....      | 80 |
| 166 | 9.6    | Benefits to Volunteers .....                                    | 80 |
| 167 | 9.7    | Risks to Study Personnel and Precautions to Minimize Risk ..... | 80 |
| 168 | 9.8    | Risks to the Environment .....                                  | 80 |
| 169 | 9.9    | Financial Incentives to Volunteers .....                        | 81 |
| 170 | 9.10   | Medical Care for Injury or Illness .....                        | 81 |
| 171 | 10     | ADMINISTRATIVE PROCEDURES .....                                 | 82 |
| 172 | 10.1   | Institutional Review Board .....                                | 82 |
| 173 | 10.2   | Protocol Amendments .....                                       | 82 |



|     |                                                                            |    |
|-----|----------------------------------------------------------------------------|----|
| 174 | Continuing Review .....                                                    | 82 |
| 175 | 10.3 Study Medication Accountability .....                                 | 83 |
| 176 | 10.4 Disposition of Data .....                                             | 83 |
| 177 | 10.5 Access to Source Data/Documents .....                                 | 83 |
| 178 | 10.6 Certification of Translation (where applicable).....                  | 83 |
| 179 | 10.7 Protocol Deviations.....                                              | 83 |
| 180 | 10.8 Compliance Inspections .....                                          | 84 |
| 181 | 10.9 Publication Policy .....                                              | 84 |
| 182 | 10.10 Responsibilities of Study Personnel .....                            | 84 |
| 183 | 10.11 Responsibilities of the Research Monitor .....                       | 86 |
| 184 |                                                                            |    |
| 185 | Appendices                                                                 |    |
| 186 | Appendix A: Cambodia National Malaria Program Treatment Guidelines (see    |    |
| 187 | attachment)                                                                |    |
| 188 | Appendix B: Dihydroartemisinin-piperaquine package insert (see attachment) |    |
| 189 | Appendix C: Primaquine package insert (see attachment)                     |    |
| 190 | Appendix D: Worldwide Antimalarial Resistance Network (WWARN) Data         |    |
| 191 | Management and Statistical Analysis Plan (see attachment)                  |    |
| 192 | Appendix E: Recent publicly available information from Sigma-tau           |    |
| 193 | pharmaceuticals describing the cardiac safety issues with Eurartesim (DHA- |    |
| 194 | piperaquine) (see attachment)                                              |    |
| 195 |                                                                            |    |
| 196 | Appendix F: DSMB Charter                                                   |    |





197

## 198 **1 PROTOCOL SUMMARY**

199

### 200 Summary Statement

201 This is a two-arm, open label **Treatment Study** comparing the efficacy, safety,  
202 tolerability and pharmacokinetics of a three-day course of Dihydroartemisinin-  
203 Piperaquine (DP) with or without single-dose primaquine in patients with  
204 uncomplicated *Plasmodium falciparum* malaria at selected sites of malaria drug-  
205 resistance in Cambodia. DHA-piperaquine, soon to be adopted as the first line  
206 antimalarial agent by the National Malaria Control Program in Cambodia, will be  
207 given as a directly observed, standard three-day fixed dose combination treatment to  
208 all volunteers enrolled. The cardiac safety of piperaquine will be monitored with  
209 electrocardiograms during the treatment period. On the last day of DP therapy,  
210 volunteers will be randomized to receive either a single 45 mg dose of primaquine  
211 (PQ) or DP treatment only (no primaquine). Resistance to DP and DP-PQ will be  
212 assessed by a combination of clinical, pharmacologic, and parasitologic parameters  
213 including genomic signatures of selection during careful weekly follow-up visits for  
214 42 days. Investigators will also be able to evaluate any possible effects of  
215 primaquine on the sexual stages of malaria (gametocytes) and potential  
216 transmissibility of infection to *Anopheles* mosquitoes as compared to those not  
217 treated with primaquine.

218

### 219 Background and Rationale

220 *Plasmodium falciparum* malaria (*Pf*) continues to be a major cause of global  
221 morbidity and mortality with 350-500 million cases per year, and over 1 million  
222 deaths. Despite containment and control efforts, *Pf* continues to be endemic in  
223 areas of Cambodia near the Thai, Lao and Vietnamese borders. Multi-drug resistant  
224 malaria has been reported recently along the Thai-Cambodian border and has  
225 emerged as a significant challenge to malaria control and containment in the region,  
226 and as such constitutes a substantial threat to the public health.

227

228 Currently the National Center for Parasitology, Entomology and Malaria Control  
229 (CNM) recommends a 3-day course of oral artesunate and mefloquine combination  
230 therapy for uncomplicated malaria infection caused by *P. falciparum*. However,  
231 recent results suggest the efficacy of this combination is declining (Wongsrichanalai,  
232 2008), and that tolerance to the artemisinin component may be a factor (Noedl,  
233 2008). DHA-piperaquine is a safe, well-tolerated drug for the treatment of drug  
234 resistant malaria, and has a well documented history of safety and effectiveness,  
235 particularly in Southeast Asia. For this reason, it has been adopted as the first line  
236 artemisinin-combination therapy (ACT) throughout Cambodia following two years of  
237 use as the first line agent in selected containment areas along the Thai border  
238 referred to as Zone 1. Monitoring for development of resistance to this combination



239 therapy and loss of clinical or parasitologic effectiveness will be crucial in the  
240 assessment and potential adjustments in Cambodian national policy regarding first-  
241 line antimalarial usage. The study will be carried out over an estimated three year  
242 period, with a goal enrollment of approximately 150 subjects, in order to observe and  
243 document any trends in resistance patterns to either DP and/or DP-PQ therapy.  
244

245 With the global push toward eradication of malaria, renewed focus on elimination of  
246 gametocytemia is a key intervention point for the interruption of transmission. The  
247 World Health Organization (WHO) currently recommends, for low to moderate  
248 transmission areas, a single dose of primaquine (0.75 mg/kg with maximum dose of  
249 45 mg) at completion of therapy for blood stage infection. However, there are few  
250 evidenced-based studies assessing this practice. This study aims to evaluate a  
251 onetime dose of primaquine in a controlled clinical study to see if it is indeed  
252 effective in reducing or eliminating gametocytemia and/or transmissibility to  
253 *Anopheles* mosquitoes in Cambodia. This evaluation will be done by detection of  
254 circulating gametocytes both by microscopy and PCR at defined time points pre- and  
255 post-treatment, as well by assessment of transmissibility of infection using female  
256 *Anopheles* mosquitoes. If an additional one time dose is found to be effective, this  
257 primaquine “transmission-blocking” therapy will be a useful adjunct to the national  
258 malaria program to further reduce the burden of malaria disease.  
259

## 260 Objectives

### 261 Primary:

- 262
- 263 1. To monitor therapeutic efficacy (based on rates of recurrence at 42 days) and  
264 search for evidence of drug resistance of a fixed-dose 3 day regimen of DHA-  
265 piperazine (DP), with and without a dose of primaquine, in volunteers with  
266 uncomplicated *P. falciparum* infection in Cambodia over a 3-year observation  
267 period.  
268
- 269 2. To establish the transmission blocking (sexual stage) efficacy of the prescribed  
270 drug regimen with or without a single oral 45 mg dose of primaquine.  
271

### 272 Secondary:

- 273
- 274 1. To document the safety and tolerability of DHA-piperazine, including the effect  
275 on the electrocardiogram (EKG), particularly the QTc interval, in patients taking 3  
276 day treatment courses of DHA-piperazine.  
277
- 278 2. Assess the degree of antimalarial drug resistance in the parasite populations in  
279 Cambodia by correlating 42 day rates of malaria recurrence clinical and  
280 pharmacodynamic outcomes (parasite clearance) with pharmacokinetic drug  
281 levels, *in vitro* drug susceptibility testing, genomic studies and molecular markers  
282 of drug resistance.  
283

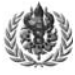

- 284 3. To quantify the reduction in sexual stage parasites (gametocytes) of the two  
285 treatment regimens assessed by 3 methods on volunteers' samples – light  
286 microscopy, PCR and a mosquito membrane-feeding assay.  
287
- 288 4. Assess the relative contributions of clinical history, baseline immunity levels and  
289 parasitologic parameters associated with prior infection on clinical outcome and  
290 parasitological responses *in vivo*.  
291
- 292 5. To build host nation capacity, with emphasis on training laboratory, clinical and  
293 entomological scientists to conduct antimalarial therapeutic efficacy and drug  
294 resistance studies.  
295
- 296 6. To cryopreserve parasite isolates to standardize antimalarial resistance  
297 surveillance monitoring methods *in vitro*.  
298
- 299 7. To provide up-to-date antimalarial efficacy data to the Cambodian government,  
300 including CNM and Ministry of National Defense, to help determine the  
301 appropriate regimens of DHA-piperaquine and primaquine for the treatment of  
302 uncomplicated malaria.  
303
- 304 8. To harmonize clinical and laboratory approaches to characterizing antimalarial  
305 drug resistance between DoD-GEIS overseas labs including, AFRIMS,  
306 USAMRU-K, and others.  
307
- 308 9. To characterize *P. falciparum* population genetic structure and study the  
309 transmissibility of genetic variants to mosquitoes by membrane feeding.  
310  
311

### 312 Population

313 Adults (aged 18 – 65 years old) with uncomplicated *P. falciparum* malaria in the  
314 vicinity of sentinel sites along the Thai-Cambodia border.  
315  
316

### 317 Study Sites

318 One or more sites authorized by the Ministry of Health and/or the Ministry of National  
319 Defense determined to have high incidence rates of *P. falciparum* malaria based on  
320 current estimates by AFRIMS, CNM and the RCAF health services. The study team  
321 will be based at two medical treatment facilities (MTF) in Battambang Referral  
322 Hospital, Battambang Province, and Along Veng Referral Hospital, Anlong Veng  
323 District. Volunteers will be recruited from the surrounding communities.  
324  
325  
326  
327



## 328 Design and Methodology

329 This is an active two arm, open-label **Treatment Study** of adults with acute,  
330 uncomplicated infection with *P. falciparum* comparing the efficacy (42 day PCR-  
331 corrected malaria recurrence rate), safety, tolerability and pharmacokinetics of a  
332 three day course of dihydroartemisinin-Piperaquine (DP) with or without a single  
333 dose of primaquine. Volunteers with uncomplicated *P. falciparum* malaria or mixed  
334 *P. falciparum/vivax* infection will be treated with of a three day course of DP under  
335 directly observed inpatient observation at the MTF. The cardiac safety of  
336 piperaquine will be monitored with electrocardiograms during the treatment period.  
337 On the last day of DP therapy, volunteers will be randomized to receive a single  
338 dose of 45mg of primaquine or no primaquine treatment.

339  
340 Volunteers will be followed weekly thereafter on days 7, 14, 21, 28, 35 and 42 for a  
341 brief clinical evaluation and fingerstick for peripheral malaria smear (with PCR  
342 assays for genotyping and gametocyte detection) to assess for any development of  
343 malaria infection. On days 7 and 14, volunteers will also have blood drawn for  
344 piperaquine drug level (with *Pf* bioassay) and mosquito membrane feeding to assess  
345 the effect of DP +/- primaquine on gametocyte transmissibility. See Section 6 for  
346 detailed outline of blood draws.

347  
348 Any volunteers with recurrent malaria symptoms during the 42-day follow-up period  
349 will be re-evaluated by microscopy, and if positive for malaria, will be treated under  
350 directly observed therapy based on current national malaria treatment guidelines for  
351 Cambodia. Parasites will be collected for *in vitro* drug susceptibility characterization  
352 and molecular markers of resistance, along with a piperaquine drug level.

353

## 354 Study Duration

355 Individual participation is expected to last 42 days from enrollment. Volunteers that  
356 have a malaria recurrence during the 42 day treatment follow-up period will be re-  
357 treated under national guidelines and be followed for the remainder of the 42-day  
358 period. If malaria infection develops after Day 35 of the study, the duration of  
359 participation for volunteers may be extended one to two weeks if necessary to  
360 ensure blood stage parasite clearance and clinical cure.

361 The study is expected to run for up to 3 years, to enroll at least 150 evaluable  
362 volunteers. Depending on observations made during this time, the study could be  
363 extended or ended early, in consultation with the responsible ethical review boards.  
364 In addition, it is possible that recommended drug regimens may change over time,  
365 depending on shifts in policy and/or drug availability in Cambodia.  
366



## 2 KEY ROLES

367  
368  
369  
370  
371  
372  
373  
374  
375  
376  
377  
378  
379  
380  
381  
382  
383  
384  
385  
386  
387  
388  
389  
390  
391  
392  
393  
394  
395  
396  
397  
398  
399  
400  
401  
402  
403  
404  
405  
406  
407  
408  
409  
410  
411  
412  
413  
414

### Principal Investigators:

Youry Se, M.D., M.P.H.M.  
Armed Forces Research Institute of Medical Sciences (AFRIMS)  
No. 18, Ste 118  
LIM Apartment,  
Phnom Penh, Cambodia  
Tel: 855 23 881 845 or 855 012 992 029  
Email: [yourys@afirms.org](mailto:yourys@afirms.org)

David Saunders, M.D., M.P.H.  
LTC, MC, USA  
Dept. of Immunology and Medicine  
Armed Forces Research Institute of Medical Sciences (AFRIMS)  
315/6 Rajvithi Road, Bangkok 10400, Thailand  
Tel. 66-2-696-2798, Fax 66-2-644-4784  
Email: [david.saunders@afirms.org](mailto:david.saunders@afirms.org)

### Clinical Investigators:

Michele Spring, M.D., M.S.P.H  
Dept. of Immunology and Medicine  
Armed Forces Research Institute of Medical Sciences (AFRIMS)  
315/6 Rajvithi Road, Bangkok 10400, Thailand  
Tel. 66-2-696-2700 ext 4624, Fax 66-2-644-4784  
Email: [michele.spring@afirms.org](mailto:michele.spring@afirms.org)

Prom Satharath, M.D.  
Department of Health,  
Ministry of National Defense  
Russian Blvd, Phnom Penh, Cambodia  
Tel: 855 12 835 565  
Email: [satharathprom@yahoo.com](mailto:satharathprom@yahoo.com)

So Mary, M.D.  
Chief of Military Health Officer of Regional 4  
Kandek commune, Srong Basat Bakorng,  
Siam Reap Province, Cambodia  
Tel: 855 97 966 6111  
Email: [mary\\_mr4@yahoo.com](mailto:mary_mr4@yahoo.com)

Sok Somethy M.A.  
Department of Health,  
Ministry of National Defense  
Russian Blvd, Phnom Penh, Cambodia  
Tel: 855 12 977 501  
Email: [soksomethy@ymail.com](mailto:soksomethy@ymail.com)



415 Chanthap Lon, M.D., M.C.T.M.  
416 Armed Forces Research Institute of Medical Sciences (AFRIMS)  
417 No. 18.Ste 118  
418 LIM Apartment  
419 Phnom Penh, Cambodia  
420 Tel: 855 23 881 845 or 855 12 976799  
421 Email: [chanthapl@afirms.org](mailto:chanthapl@afirms.org)  
422  
423 Delia Bethell, B.M. BCh, M.A.  
424 Dept. of Immunology and Medicine  
425 Armed Forces Research Institute of Medical Sciences (AFRIMS)  
426 315/6 Rajvithi Road, Bangkok 10400, Thailand  
427 Tel. 66-2-696-2791, Fax 66-2-644-4784  
428 Email: [delia.bethell@afirms.org](mailto:delia.bethell@afirms.org)  
429  
430 Sut Thangphann, M.D.  
431 National Center for Parasitology, Entomology and Malaria Control  
432 Office: #372, Monivong Blvd.  
433 Phnom Penh, Cambodia  
434 Tel.: 855 23 211 926,  
435 Fax: 855 23 211 926  
436 Email: [sut\\_thangphann@yahoo.com](mailto:sut_thangphann@yahoo.com)  
437  
438  
439 Jongsakul Krisada, M.D.,  
440 Dept. of Immunology and Medicine  
441 Armed Forces Research Institute of Medical Sciences (AFRIMS)  
442 315/6 Rajvithi Road, Bangkok 10400, Thailand  
443 Tel. 66-2-696-2700, Fax 66-2-644-4784  
444 Email: [Krisadaj@afirms.org](mailto:Krisadaj@afirms.org)  
445  
446  
447  
448  
449 Clinical Research Coordinator:  
450  
451 Mali Ittiverakul RN, Clinical Research Coordinator  
452 Dept. of Immunology and Medicine  
453 Armed Forces Research Institute of Medical Sciences (AFRIMS)  
454 315/6 Rajvithi Road, Bangkok 10400, Thailand  
455 Tel. 66-2-696-2791, Fax 66-2-644-4784  
456 Email: [Malii@afirms.org](mailto:Malii@afirms.org)  
457  
458 Soklyda Chann RN  
459 Armed Forces Research Institute of Medical Sciences (AFRIMS)  
460 #18 118St. Meataphea, Phnom Penh, Cambodia  
461 Cell Phone: +855 12 662 751  
462 Email: [soklyda.chann@afirms.org](mailto:soklyda.chann@afirms.org)  
463



464 Laboratory Investigators:

465

466

Charlotte Lanteri, PhD.

467

Dept. of Immunology and Medicine

468

Armed Forces Research Institute of Medical Sciences (AFRIMS)

469

315/6 Rajvithi Road, Bangkok 10400, Thailand

470

Tel. 66-2-696-2796, Fax 66-2-644-4784

471

Email: [charlotte.lantieri@afirms.org](mailto:charlotte.lantieri@afirms.org)

472

473

Paktiya Teja-isavadharm, PhD.

474

Dept. of Immunology and Medicine

475

Armed Forces Research Institute of Medical Sciences (AFRIMS)

476

315/6 Rajvithi Road, Bangkok 10400, Thailand

477

Tel. 66-2-696-2795, Fax 66-2-644-4784

478

Email: [paktiyat@afirms.org](mailto:paktiyat@afirms.org)

479

480

Pattaraporn, Vanachayangkul PhD

481

Dept. of Immunology and Medicine

482

Armed Forces Research Institute of Medical Sciences (AFRIMS)

483

315/6 Rajvithi Road, Bangkok 10400, Thailand

484

Tel. 66-2-696-2791, Fax 66-2-644-4784

485

Email: [pattarapornv@afirms.org](mailto:pattarapornv@afirms.org)

486

487

Ratawan Ubalee, PhD

488

Chief, Malariology Section

489

Dept. of Entomology.

490

Armed Forces Research Institute of Medical Sciences (AFRIMS)

491

315/6 Rajvithi Road, Bangkok 10400, Thailand

492

Tel. 66-2-696-2818, Fax 66-2-354-7885

493

Email: [ratawanu@afirms.org](mailto:ratawanu@afirms.org)

494

495

Alongkot Ponlawat, PhD.

496

Chief, Vector Biology and Control Section

497

Dept. of Entomology.

498

Armed Forces Research Institute of Medical Sciences (AFRIMS)

499

315/6 Rajvithi Road, Bangkok 10400, Thailand

500

Tel. 66-2-696-2816, Fax 66-2-354-7885

501

Email: [alongkotp@afirms.org](mailto:alongkotp@afirms.org)

502



503 Suwana Chaorattanakawee, PhD  
504 Dept. of Immunology and Medicine  
505 Armed Forces Research Institute of Medical Sciences (AFRIMS)  
506 315/6 Rajvithi Road, Bangkok 10400, Thailand  
507 Tel. 66-2-696-2791, Fax 66-2-644-4784  
508 Email: suwannac@afirms.org  
509  
510 Sathit Pichyangkul, PhD.  
511 Dept. of Immunology and Medicine  
512 Armed Forces Research Institute of Medical Sciences (AFRIMS)  
513 315/6 Rajvithi Road, Bangkok 10400, Thailand  
514 Tel. 66-2-696-2791, Fax 66-2-644-4784  
515 Email: sathitp@afirms.org  
516  
517 Panita Gosi, PhD.  
518 Dept. of Immunology and Medicine  
519 Armed Forces Research Institute of Medical Sciences (AFRIMS)  
520 315/6 Rajvithi Road, Bangkok 10400, Thailand  
521 Tel. 66-2-696-2791, Fax 66-2-644-4784  
522 Email: panitag@afirms.org  
523  
524 Steven R Meshnick, MD, PhD  
525 Jonathan Juliano, MD  
526 Jessica Lin, MD  
527 Department Of Epidemiology, CB#7435  
528 Gillings School of Global Public Health  
529 UNC School of Medicine  
530 Chapel Hill, NC 27599  
531  
532 Source of funding:  
533 Global Emerging Infections Surveillance and Response System  
534 (GEIS)  
535  
536 Research Monitor:  
537 Koy Lenin, M.D.  
538 Battambang Referral Hospital  
539 Emergency and ICU unit  
540 Dongkorteap village, Tuol Ta Ek Commun,  
541 Battambang District, Battambang Province  
542 Tel: 855 53 730 100  
543 Fax: 855 53 953 223  
544  
545 Kong Phan, M.A.  
546 ICU, Anlong Veng Referral Hospital  
547 Anlong Veng Commune, Anlong Veng District,  
548 Oddormean Chey Province, Cambodia  
549 Tel: 855 976 476 188  
550  
551  
552





553 Laboratory Coordinators:

554  
555 Worachet Kuntawunginn  
556 Laboratory Quality Assurance  
557 Dept. of Immunology and Medicine  
558 Armed Forces Research Institute of Medical Sciences (AFRIMS)  
559 315/6 Rajvithi Road, Bangkok 10400, Thailand  
560 Tel. 66-2-696-2791, Fax 66-2-644-4784  
561 Email: worachetk@afirms.org

562  
563 Montri Arsanok  
564 Medical Technologist  
565 Dept. of Immunology and Medicine  
566 Armed Forces Research Institute of Medical Sciences (AFRIMS)  
567 315/6 Rajvithi Road, Bangkok 10400, Thailand  
568 Tel. 66-2-696-2791, Fax 66-2-644-4784  
569 Email: montria@afirms.org

570  
571 Consultants:

572  
573 Char Meng Chuor, MD, MPH, Director  
574 Keng Sim, MD, Deputy Director  
575 National Center for Parasitology, Entomology and Malaria Control  
576 Office: #372, Monivong Blvd. Corner St. 322  
577 Phnom Penh, Cambodia  
578 Tel.: 855 12 926 266, Fax: 855 12 841 168  
579 Email: mengchuor@cnm.gov.kh

580  
581 Lieutenant General Kong Saly  
582 Major Deth Vantha  
583 Department of Health  
584 Ministry of National Defense  
585 Russian Blvd, Phnom Penh, Cambodia  
586 Tel: 855 12 835 565

587  
588 Mark Fukuda, COL, MC  
589 Armed Forces Health Surveillance Center  
590 11800 Tech Rd  
591 Silver Spring, MD 20904, USA  
592 Tel.: 301-319-3289 Fax: 301-319-9213  
593 Email: Mark.Fukuda@us.army.mil

594  
595 Douglas Walsh, M.D.  
596 Dept. of Dermatology  
597 Charlie Norwood Veterans Affairs Medical Center  
598 950 15th St Augusta, GA 30901  
599 Email: dsw518@yahoo.com

600  
601  
602



603 Institutions engaged in Human Subjects Research:

- 604  
605 National Center for Parasitology, Entomology and Malaria Control  
606 #372, Monivong Blvd., Phnom Penh, Cambodia  
607 Tel.: 855 23 211 926; Fax 855 23 996 202  
608 (FWA# 00010451)  
609  
610 Ministry of National Defense, Royal Cambodian Armed Forces  
611 Department of Health,  
612 Ministry of National Defense  
613 Russian Blvd, Phnom Penh, Cambodia  
614 Tel: 855 12 835 565  
615 (FWA# 00014798)  
616  
617 Armed Forces Research Institute of Medical Sciences (AFRIMS)  
618 Department of Immunology and Medicine  
619 315/6 Rajvithi Road, Bangkok 10400, Thailand  
620 Tel. 66-2-696-2791; Fax 66-2-644-4784  
621 (FWA# 00000015)  
622

623 Laboratories:

- 624  
625 Armed Forces Research Institute of Medical Sciences (AFRIMS)  
626 Dept. of Immunology and Medicine  
627 315/6 Rajvithi Road, Bangkok 10400, Thailand  
628 Tel. 66-2-696-2791; Fax 66-2-644-4784  
629  
630 AFRIMS/CNM Reference Laboratory  
631 Battambang Referral Hospital  
632 Dongkorteap Village, Tuol Ta Ek Commun,  
633 Battambang District, Battambang Province, Cambodia  
634 Tel: +855 92 666 959  
635  
636 AFRIMS/CNM Field Laboratory  
637 Anlong Veng Referral Hospital  
638 Anlong Veng, Oddormean Cheay Province, Cambodia  
639 Tel: +855 99 230 488  
640  
641 University of North Carolina  
642 c/o Steven Meshnick  
643 3113 Hooker Research Building  
644 135 Dauer Dr.  
645 Chapel Hill, NC 27599  
646  
647  
648  
649  
650



651 Institutional Review Boards:

652 WRAIR IRB (FWA# 00000015, IRB#00000794)  
653 Walter Reed Army Institute of Research  
654 Human Subjects Protection Branch 503 Robert Grant Ave., Silver  
655 Spring, MD 20910-7500  
656 Tel.: 301-319-9940  
657 Fax: 301-319-9961  
658 Email: wrairhspb@amedd.army.mil  
659

660 National Ethics Committee for Health Research (NECHR)  
661 Hlth IRB# 1 (FWA# 00010451, IRB # 00003143)  
662 #2 Kim Il Sung Blvd, Khan Tuol Kok, Phnom Penh. Cambodia  
663 Tel.: 855 23 880-345, Fax: 855 23 880-346  
664 E-mail: research03@nchads.org.  
665

666 University of North Carolina (NHSR Determination)  
667 Office of Human Research Ethics (FWA# 00004801, IRB # 00000540)  
668 Medical School Building 52  
669 Mason Farm Road, CB 7097  
670 Chapel Hill, NC 27599  
671 Tel.: (919) 966-3113  
672 ohre.unc.edu

CONFIDENTIAL



673

674

## 3 BACKGROUND AND RATIONALE

675

676

### 3.1 Introduction

677

678

679

680

681

682

683

684

685

686

687

688

689

690

691

692

693

694

695

696

697

698

699

700

701

702

703

704

705

706

707

708

709

710

711

712

713

714

The US military is charged with protecting personnel deployed to malarious areas, and must be prepared for potential world-wide deployments on short notice. In addition to public health measures to protect and sustain the force, the US military has invested substantially in products to protect the warfighter from malaria at considerable cost. Despite these investments, efficacy is threatened by multi-drug resistant malaria parasites with increasing resistance to remaining effective drug classes becoming more apparent. The development of a “next-generation” malaria chemoprophylaxis agent has long been an identified requirement for advanced clinical development by the US Army. However, any development candidate is threatened by the possibility of antimalarial drug resistance. Therefore, accurate, timely and relevant data on antimalarial drug resistance, in part as a predictor of resistance patterns likely to emerge in the near future are of critical importance to military planners.

Multidrug resistance is a significant problem in many regions of the world, where most strains of *P. falciparum* are no longer susceptible to the available anti-malarial compounds. This problem has been well documented in Southeast Asia, and it is predicted that a similar situation will occur in Africa (Wongsrichanalai, 2001 and 2002; Hyde, 2002). Chloroquine, once the first-line defense against malaria in Kenya, is no longer effective because of the evolution of multidrug resistant parasites (Price, 2001; Bloland, 1993; Shretta, 2000). Chloroquine replaced sulfadoxine-pyrimethamine as the drug of choice, but parasite resistance to this treatment developed quickly as well (Omar, 2001; Mberu, 2000; Khan, 1997). As a result, new candidates for antimalarial chemoprophylaxis and treatment to protect the deployed warfighter are being developed by the US Army with a view to preventing the development of resistance. Cambodia has been particularly hard-hit by drug resistance with many drugs having fallen to resistance over recent years including chloroquine, mefloquine, sulfadoxine-pyrimethamine, and now some evidence of artemisinin resistance. AFRIMS has an existing research team on the ground which has been actively conducting malaria resistance research in Cambodia for the past 6 years in partnership with the Cambodian National Center for Parasitology, Entomology and Malaria Control (CNM) and the Royal Cambodian Armed Forces (RCAF). This study aims to monitor and gather information regarding the continued effectiveness of an artemisinin-based antimalarial regimen in areas of known drug resistance in Cambodia as well as assess the effectiveness of primaquine as a transmission blocking therapy.



## 715 **3.2 Malaria in Cambodia**

### 716 **3.2.1 Access, availability and cost of medical care in Cambodia**

717 Overall, health outcomes have been gradually improving in Cambodia over the past  
718 5 years. The infant mortality rate decreased from 95 per 1,000 live births in 2000 to  
719 66 per 1,000 live births in 2005, and continues a steady decline. For pregnant  
720 women antenatal health checks, with tetanus immunization and iron supplements if  
721 indicated, are offered monthly free of charge from 7 months of pregnancy. In  
722 Battambang and neighboring provinces the proportion of women delivering at a  
723 health care facility is 36%. The government expenditure on healthcare per capita is  
724 roughly \$4 (Ministry of Health, 2006). Despite significant progress, the health status  
725 of the Cambodian people is still among the lowest in the region.

726 Access to medical care has gradually improved for individuals at highest risk for  
727 malaria, including those who are living far from the health facility, such as traditional  
728 forest inhabitants, temporary forest migrants, and new forest settlers. In general,  
729 public health centers provide basic medical care for a small charge. There are small  
730 use charges - e.g., \$0.12 charge per visit for the out-patient department and a \$5  
731 charge for in-patient care. Particularly poor patients may be treated free of charge  
732 based on means testing. Neither private nor government health insurance is  
733 generally available, particularly in rural areas.

### 734 **3.2.2 Malaria Epidemiology**

735  
736 Malaria typically occurs in seasonal peaks in Cambodia. While malaria transmission  
737 is reported to have declined dramatically in Battambang Province (where AFRIMS  
738 has conducted field studies in the past), rates of uncomplicated malaria remain high  
739 in Oddor Meanchey. From September to December 2009, AFRIMS collected  
740 samples from 214 smear-positive malaria cases Oddor Meanchey Province under  
741 protocol WR 1576. The species distribution of these infections was 60% *P.*  
742 *falciparum*, 37% *P. vivax*, and 4% mixed infections. More than 50% of cases were  
743 detected through active surveillance of fever cases by community outreach. Of 531  
744 cases of fever evaluated, 24.9% had malaria parasites with 51 *P. falciparum* cases  
745 and 78 *P. vivax* cases.

746  
747 Data from the Anlong Veng health center in Oddor Meanchey Province in 2008  
748 indicate two peak seasons: the first in June – August, with a second peak October –  
749 December. In 2008, there were 676 cases of uncomplicated malaria reported from  
750 this health center alone: 54% *P. falciparum*, 38% *P. vivax*, and 8% mixed infection.  
751 This suggests a population with mixed immunity levels and subgroups with high  
752 rates of subclinical infection, as well as a large number of symptomatic individuals  
753 presenting to healthcare facilities. In addition, there were 284 severe malaria cases  
754 requiring admission for parenteral therapy, and seven in-hospital deaths were  
755 reported, suggesting that interventions to improve access to early diagnosis and  
756 treatment of malaria remain priorities for this region. Several factors appear to have



757 contributed to the relatively higher mortality rates among patients who were referred  
758 to government hospitals including delayed presentation, delayed admission referral,  
759 cultural beliefs, and difficulty accessing health care facilities in this austere setting.  
760 The key to preventing mortality remains early detection, appropriate and effective  
761 anti-malarial treatment and referral where necessary.  
762

763 Little has been reported in the peer reviewed literature about the burden of severe  
764 malaria in Cambodia. Recently AFRIMS conducted a study of severe malaria at  
765 Battambang Referral Hospital 2006-2009 (unpublished). A total of 537 cases were  
766 discharged from BRH with a diagnosis of severe malaria infection over the 3.5 year  
767 period. Overall mortality was 14%. Two hundred thirty three cases (43.4%) were  
768 documented *P. falciparum* infection; 41 (7.6%) were *P. vivax*; 17 (3.2%) were mixed  
769 infection with *P. falciparum* and *P. vivax* and 246 (45.8%) were diagnosed as  
770 malaria infection but were slide-negative or a slide was not read and/or reported. Of  
771 the 246 smear negative clinical diagnoses, 126 (51.2%) were determined by the  
772 investigators to be otherwise compatible with a severe malaria diagnosis under  
773 national guidelines after reviewing co-morbidities and hospital course. Among the  
774 slide-negative patients, 106 (43.1%) were treated with anti-malarial drugs alone, and  
775 another 140 (56.9%) were given combined treatment with an anti-malarial drug and  
776 an antibiotic due to suspicion of bacterial co-infection.  
777

### 778 **3.2.3 Trends in artemisinin resistance in Cambodia**

779 AFRIMS recent work in malaria drug resistance began on the Thai side of the border  
780 in Trat Province in 2006 when it was found that cure rate with the then standard 2-  
781 day artesunate plus mefloquine (A + M) course was only 78.6% (Vijaykadga *et al.*,  
782 2006). In follow-up to this work, AFRIMS designed a study to compare 2- vs. 3-day  
783 A+M in Trat, but due to declining transmission of *P. falciparum* in that area,  
784 investigators were able to enroll only 13 subjects. However, there were three  
785 treatment failures out of the six volunteers enrolled in the 2-day A + M treatment  
786 group (Bethell, unpublished) suggesting that resistance was indeed evolving.  
787

788 This work was followed up in 2007 in the nearby border area of Tasahn, Cambodia.  
789 Ninety subjects with uncomplicated *P. falciparum* were enrolled and randomized in  
790 2:1 allocation to 7 days of artesunate monotherapy (AS) at 4 mg/kg or 7 days of  
791 quinine and tetracycline (Q-T) with 28 day follow-up in a non-transmission area  
792 (Noedl, 2008). The adequate clinical and parasitological response (ACPR) was  
793 similar for both drugs: 94% for AS vs. 100% for Q-T. Artesunate did demonstrate  
794 statistically significant shorter median parasite clearance times (PCTs) (57.6 hours  
795 versus 77.5 hours,  $p=0.004$ ) as well as better tolerability. There were two subjects  
796 receiving AS who had recrudescences despite what were considered to be adequate  
797 plasma drug levels with  $IC_{50}$  approximately four times higher against DHA than those  
798 volunteers who were cured. This study was followed up by a more detailed study in  
799 2009 at the same site where 134 evaluable subjects with *P. falciparum* were enrolled  
800 to 2, 4 or 6 mg/kg AS monotherapy in 2:1:2 treatment allocation. Despite overall  
801 increased mean parasite clearance times compared to the 2007 study, there were



802 no significant differences in ACPR or treatment failures among the three groups, nor  
803 were there clear correlations between clinical outcomes and plasma  
804 pharmacokinetic drug levels or in vitro parasite drug resistance profiles (Bethell  
805 2011). Of note, the 6 mg/kg dosing arm had to be halted after five of the 25 enrolled  
806 subjects developed non-clinically significant neutropenia, an apparent dose-limiting  
807 toxicity. Despite great variability in drug resistance metrics, it was concluded that  
808 the increase in PCTs over 3 years, combined with elevated IC<sub>50</sub>s against DHA, was  
809 a sign of emerging resistance, and that ongoing surveillance was required.

810

811 As of 2011, there are few if any agents to fill the gap should the current antimalarials  
812 in use in Cambodia fall to resistance, and a vaccine is not likely to be available in the  
813 clinic for at least several years. Therefore, a combination of rational drug use with  
814 ongoing monitoring for resistance patterns must be pursued. This latter point can be  
815 achieved by monitoring for any fall in efficacy below 90% using a standard 42 day  
816 efficacy protocol as recommended by WHO, and if such a decline is detected, this is  
817 generally considered to be indicative of a need to switch to a new agent. Detecting  
818 and quantifying drug resistance in its early stages requires a combined *in vivo* - *in*  
819 *vitro* strategy. The generally accepted approach is a careful analysis of clinical  
820 treatment response parameters combined with in vitro drug sensitivity data. In  
821 addition, this study hopes to gather evidence for the potential usefulness of adding a  
822 single dose regimen of primaquine to interrupt malaria transmission by eliminating  
823 circulating gametocytes. This then is the basis for the current proposal for a 42-day  
824 efficacy study to a standard 3-day course of DP or DP/PQ treatment for acute *P.*  
825 *falciparum* infection in Cambodia.

826

### 827 **3.3 Dihydroartemisinin-piperaquine**

828 Dihydroartemisinin-piperaquine (DP) is a combination of a potent, rapid acting  
829 artemisinin derivative, combined with a long-acting 4-aminoquinoline (bis-quinoline),  
830 similar to chloroquine. Dihydroartemisinin (DHA) is the active metabolite of  
831 artesunate and artemether. Piperaquine is highly active against chloroquine-  
832 resistant *Plasmodium falciparum*, and *vivax* (Hung, 2004) and has a terminal half-life  
833 of several weeks (Tarning, 2008). Between 2003 and 2006, clinical trials on the  
834 safety and efficacy of DP in against *P.falciparum* and *P. vivax* malaria were carried  
835 out in several countries: Thailand, Myanmar, Laos and Cambodia, Uganda, Rwanda  
836 (Zwang, 2009). In all trials, follow-up was at least 28 days and new infections were  
837 distinguished from recrudescences by PCR correction. In this pooled analysis of  
838 more than 3,547 uncomplicated malaria patients (1,814 on DP), DP was safe and  
839 highly effective. DP administered as treatment was well tolerated with less adverse  
840 events in children and adults compared to a 3-day regimen of mefloquine and  
841 artesunate with the exception of diarrhea. DP treatment resulted in a rapid  
842 clearance of fever and parasitemia with a cumulative PCR-corrected efficacy at Day  
843 28 of 98.7% (95% CI 97.6–99.8). DP was superior to the comparator drugs in  
844 protecting against both *P. falciparum* recurrence and recrudescence. There was no  
845 difference between DP and Artesunate + Mefloquine for 3 days in treating *P. vivax*  
846 co-infections and in suppressing the first relapse. This suggests that DHA-



847 piperazine could serve as a highly effective antimalarial therapy, particularly in  
848 settings of drug resistance where combination therapy is desirable (Janssens, 2007;  
849 Zwang, 2009).

850  
851 DP has been studied in endemic areas of Cambodia. A randomized open-label non-  
852 inferiority study comparing the efficacy of 3 days of DP to 3 days of artesunate and  
853 mefloquine (A+M) in 464 Cambodian patients found that PCR-adjusted cure rates on  
854 day 63 were nearly identical at 97.5% for both DP and A+M (Janssens, 2007). DP  
855 was better tolerated; vomiting, dizziness, palpitations, and sleep disorders were all  
856 more commonly reported in the A+M group, consistent with the side-effect profile of  
857 mefloquine. In 2010, USAMC-AFRIMS, CNM and RCAF conducted a malaria  
858 treatment study (WR 1737) comparing 2 versus 3 days of DHA-piperazine although  
859 administering the same cumulative treatment dose currently recommended by WHO  
860 (360mg/2880mg). A total of 80 subjects were enrolled. The study found that there  
861 were no differences in DHA-piperazine efficacy with rates of malaria recurrence at  
862 42 days being very similar in both groups: 89% per protocol efficacy for 2 days of DP  
863 (95% CI = 76-96%) and 92% for 3 days of DP (95% CI = 80-97%). Only 2 cases  
864 (2.5%) recurred within 30 days of treatment.

865  
866 A formulation of DP known as Eurartesim® (dihydroartemisinin-piperazine), has  
867 been submitted to the EMEA on 2 July 2009 for regulatory approval by Sigma-tau  
868 Italy and MMV. An NDA is also likely to be submitted to the U.S. FDA. DP has been  
869 found to be highly effective against *P. falciparum* malaria in adults and children, has  
870 a simple dosing regimen (only 3 administrations over 3 days) compared to  
871 artemether lumefantrine (Coartem) – the current global standard ACT. In addition,  
872 DP has been shown to offer greater protection against new infections than other  
873 ACTs, for at least 2 months after treatment. The regulatory dossier submitted  
874 comprises data from large clinical trials that involved over 2,700 patients in Africa  
875 and Asia of whom 1,600 were children under 5 (MMV press release, July 2009).  
876 The US Army has engaged in preliminary discussion with Sigma-tau regarding a  
877 possible development partnership, but no formal agreement exists at this time. While  
878 the Eurartesim product has not yet been granted EMEA licensing approval as of  
879 writing, several non-GMP forms of this combination product are available from  
880 manufacturers in China. Duo-cotecxin and Artekin are brand names for two of the  
881 products that are available in Cambodia, and this study will use the former for  
882 malaria treatment.

883  
884 Confidential data from the Investigator's Brochure of DHA-piperazine provided to  
885 the US Army by Sigma-Tau did reveal that QTc prolongation was seen at treatment  
886 doses in two large Phase 3 studies conducted in Asia and Africa although these  
887 increases were mild and transient. EKGs on days 0 (pre-dose), 2 and 7 were  
888 obtained on roughly 1000 subjects dosed either with DHA-piperazine or a  
889 comparator ACT drug for treatment of uncomplicated malaria. In the Asian study  
890 (ST3073+ST3074 DM040010), there was a statistically significant increase in the  
891 proportion of patients with borderline and prolonged QTcB and QTcF values in the  
892 DP versus the Artesunate + Mefloquine group, but by Day 7, there was no difference





893 between treatments. In the African Study (ST3073+ST3074 DM040011), there was a  
894 highly statistically significant difference on day 2 between treatments in QTcB but  
895 not QTcF prolongation, with a higher proportion of patients in the DP group having  
896 borderline or prolonged QTcB intervals than in the artemether-lumefantrine group.  
897 This had also resolved by Day 7.

898

899 Mytton et al (2007) published the results of two clinical trials evaluating QT  
900 prolongation following DHA-piperazine therapy that found minimal QT prolongation  
901 indistinguishable from that attributable to malaria itself during and shortly after  
902 dosing over 48 hours. Further, the QT prolongations observed could not be  
903 distinguished from previously documented QT interval changes reported for other  
904 antimalarials without QT-prolonging properties. In the recently updated guidelines  
905 from WHO (2010) on treatment of malaria, DP was added to the list of first-line ACTs  
906 based on results from head-to-head drug studies conducted with alternative ACT  
907 regimens. Regarding potential cardiac adverse events, the guidelines state "There  
908 have been reports of...bradycardia and prolongation of the QT interval, although  
909 most studies have not found any electrocardiographic abnormalities."

910

911 In AFRIMS WR 1737 evaluating 2- vs. 3-day DP dosing, the effect on the cardiac QT  
912 interval was studied intensively. EKGs were obtained at screening, pre-dose, daily  
913 for 3 days, and then weekly for 4 weeks if prolongations were seen during the dosing  
914 period. Mean QTcB increased only 5-6%, or 6-7% by QTcF, over baseline following  
915 dosing, and the treatment groups were essentially indistinguishable in terms of  
916 adverse events. Only 2 out of 80 volunteers had a prolongation greater than 20%  
917 over baseline by QTcB or QTcF, and in both cases, this was observed on a single  
918 day during a 6 week follow-up period. Of note, one volunteer had greater than  
919 500ms prolongation by QTcB and QTcF on one measurement, but this was transient  
920 and resolved within 24 hours. Further, in many cases, prolongation was clearly due  
921 at least in part to the confounding effects of fever, malaria and the increased heart  
922 rates associated with both. Overall, the drug effect was modest in this population,  
923 and similar to what has been seen in the other large phase 3 studies.

924

925 In 2012, AFRIMS conducted a randomized, double-blind clinical study WR 1849,  
926 "Malaria Prevention Cambodia", comparing a 2 day course of DHA-piperazine to  
927 placebo in healthy military volunteers in northern Cambodia. Intensive cardiac  
928 safety monitoring of the QTc interval was conducted, with oversight and expert  
929 review by an unblinded Data Safety Monitoring Board made up of 2 board certified  
930 cardiologists, and chaired by an experience clinical pharmacologist. Prespecified  
931 cohort safety rules included individual halts for sustained QTc interval prolongations  
932 greater than 500 ms (grade 3 adverse events), and an unblinded review of all  
933 volunteer cardiac safety data if/when 4 volunteers were halted. Unexpectedly, 4  
934 healthy volunteers met individual halting criteria with transient QTc prolongations at  
935 peak expected piperazine concentrations measured at 4 hours post dose. This  
936 occurred in the first or second month of dosing for all those halted. While QTc  
937 prolongations resolved in all cases and returned to baseline within 24 hours as



938 expected based on the pharmacology of piperazine, the study was halted based on  
939 the a priori halting rules with the following recommendations from the DSMB:

940

- 941 1. Discontinue enrollment in the study now and do not re-challenge previously  
942 "Halted" subjects.
- 943 2. Amend the protocol to intentionally reduce peak systemic exposure to  
944 piperazine by either dosing over 3 days instead of 2 days AND/OR  
945 administer medication after a period of fasting.
- 946 3. Consider further targeted research to evaluate the 4 "Halted" subjects  
947 (regarding PK and electrocardiographic PD).

948

949

950 QTc prolongations seen in this low risk population were transient and clinically  
951 insignificant. However, it remains possible that the piperazine may cause a  
952 clinically significant effect on the QTc interval following a single treatment course in  
953 high risk populations including as those with congenital long-QT syndrome, or  
954 acquired long-QT syndrome due to concomitant QT prolonging drug administration.  
955 Therefore, cardiac EKG monitoring will be performed in the present study,  
956 incorporating the lessons learned and essential safety monitoring features of WR  
957 1737 and WR 1849. Because malaria can itself prolong the QTc interval due to  
958 fever and tachycardia, exclusion and follow-up criteria from WR 1737 (also a DHA-  
959 piperazine treatment study) will be used.

960

961 This approach is in line with recent recommendations for the DHA-piperazine  
962 product manufactured by Sigma-tau pharmaceuticals (Eurartesim). The packaging  
963 and labeling information of Eurartesim was recently made publicly available (see  
964 Appendix E). In addition to fasting where possible prior to administering the drug,  
965 the following recommendations were made:

966

967 *"When clinically appropriate, consideration should be given to obtaining an ECG*  
968 *from all patients before the last of the three daily doses is taken and approximately*  
969 *4-6 hours after the last dose, since the risk of QTc interval prolongation may be*  
970 *greatest during this period (see section 5.2). QTc intervals of more than 500 ms are*  
971 *associated with a pronounced risk for potentially life-threatening ventricular*  
972 *tachyarrhythmias. Therefore, ECG monitoring during the following 24-48 hours*  
973 *should be applied for patients found to have a prolongation to this extent. These*  
974 *patients should not receive another dose of Eurartesim and alternative antimalarial*  
975 *therapy should be instituted."* (Appendix E, page 5)

976

977 The current protocol is thus designed to include these assessments and safety  
978 monitoring procedures as recommended.

### 979 **3.4 Primaquine**

980 The rapid identification and treatment of malaria patients with drugs such as DHA-  
981 piperazine that effectively clear blood stage infection will be crucial in future malaria  
982 elimination/eradication efforts. The 8-aminoquinolone compound primaquine has



983 limited use as a blood schizonticide but, importantly, it has unique effects on stages  
984 of the malaria parasite not demonstrated by other available licensed antimalarials.  
985 Primaquine has an effect on non-dormant liver stages (merozoites) of both *P.*  
986 *falciparum* and *P. vivax*, and thus is the only effective agent with causal (liver stage)  
987 activity. This activity in the liver extends to clearance of hypnozoites of *P. vivax* and  
988 *P. ovale*. Additionally, primaquine also has effects on the gametocyte stage as well.  
989 This is particularly pertinent for the success of control programs in which the  
990 elimination of circulating gametocytes in asymptomatic or recently treated persons  
991 will prevent the transmission and spread of malaria in the community. The current  
992 WHO guidelines for treatment of malaria infection include a recommendation for a  
993 single dose of primaquine at conclusion of treatment for clinical infection with *P.*  
994 *falciparum* (WHO Guidelines for the treatment of malaria, 2<sup>nd</sup> ed. 2010). This  
995 recommendation is pertinent at this time only for low transmission areas where  
996 gametocyte carriers are responsible for maintenance of transmission of the disease.  
997 The treatment dose recommended is 0.75 mg/kg to be given orally with a maximum  
998 dose of 45 mg.

999

1000 Although this recommendation exists, transmission blocking strategies have not  
1001 been widely or comprehensively pursued to date, and clinical evidence for  
1002 effectiveness is limited. A significant purpose of this study is to develop good clinical  
1003 evidence for this strategy, and determine its appropriateness. While a single  
1004 primaquine dose is recommended, gametocytes have been observed to circulate for  
1005 up to several weeks following resolution of an asexual blood stage infection.  
1006 Further, the biology of asymptomatic sexual stage malaria is not as well understood  
1007 as that of the asexual stage.

1008

1009 Appearance of *Plasmodium* sexual stages, i.e., male and female gametocytes, in the  
1010 peripheral blood that are transmissible to female *Anopheles* mosquitoes is estimated  
1011 to occur 7-14 days after emergence and replication of asexual stages in the  
1012 bloodstream (Bousema, 2011). The triggers for development of an asexual blood  
1013 stage merozoite into the sexual stages are unknown. Upon invasion of a red blood  
1014 cell, a merozoite committed to differentiation into a gametocyte must progress  
1015 through five stages (I-V) of maturation. The initial immature stages of gametocytes  
1016 (Stages I-IV) are absent from the peripheral circulation and are thought to be  
1017 sequestered in small blood vessels and perhaps in the bone marrow and spleen.  
1018 Mature gametocytes (Stage V) are then released into the peripheral circulation,  
1019 although it takes 2-3 days to become infectious for feeding mosquitoes. The  
1020 sequestration period can be as long as 12 days, followed by an indeterminate period  
1021 of circulation in the blood stream. Thus gametocytes could appear weeks after  
1022 successful treatment of a clinical episode, leaving recently treated patients to serve  
1023 as a reservoir for transmission of malaria in their communities.

1024

1025 To complicate the matter of sequestration, mature gametocytes comprise <5% of  
1026 circulating parasites and thus can be difficult to detect by light microscopy; however,  
1027 despite circulating at such low densities, mosquitoes are able to take up  
1028 gametocytes efficiently, resulting in transmission of infection (Coleman 2004,



1029 Schneider 2007). Molecular techniques such as PCR can aid in detecting low level  
1030 gametocytemia (Bousema 2006, Shekalaghe 2007) and a recent meta-analysis  
1031 estimated that gametocytemia is detected on average 50% less by light microscopy  
1032 compared to PCR methods (Okell 2009).

1033  
1034 Unfortunately, antimalarial drugs used to treat a clinical infection may not also  
1035 eliminate gametocytes from the bloodstream (Bousema, 2011). Drugs such as  
1036 quinine, chloroquine and sulfadoxine-pyremethamine have limited effects on  
1037 gametocytes and some studies have reported these drugs can increase the number  
1038 of gametocytes in the peripheral blood, although this may be due to immature  
1039 gametocytes being flushed from sequestration (Targett, 2001, Robert 2000, Dunyo  
1040 2006). Artemisinin rapidly clear asexual parasites in the bloodstream and are  
1041 thought to affect numbers of immature gametocytes as well (Pukrittayakamee, 2004,  
1042 Chotivanich 2006). Thus, this class of drugs can affect gametocytemia both directly  
1043 by clearing immature gametocytes, as well as indirectly by killing circulating  
1044 trophozoites and schizonts so the numbers available to later differentiate into  
1045 gametocytes is effectively decreased. Primaquine, which is only minimally effective  
1046 against the asexual blood stages of *P. falciparum*, is the only licensed antimalarial  
1047 demonstrated to be effective in killing mature gametocytes.

1048  
1049 A study done in Tanzanian children with *P. falciparum* infection illustrates the benefit  
1050 of the WHO policy of a single dose of primaquine (Shekalaghe, 2007). Children  
1051 aged 3-15 years were randomized to SP and AS (single dose SP with three days of  
1052 artesunate) plus a onetime dose of primaquine (0.75 mg/kg) or placebo at the  
1053 conclusion of treatment for malaria infection. The prevalence of volunteers with  
1054 gametocytes detectable by microscopy at baseline ranged from 19-25%, but when  
1055 evaluated by PCR, the prevalence was much higher at 88-91%. On day 14 post-  
1056 treatment there was a large difference in prevalence of volunteers with PCR-  
1057 detected gametocytemia: 4% in SP+AS+PQ group and 63% in SP+AS+placebo  
1058 group. In addition, both the density of gametocytes and duration of carriage were  
1059 statistically significantly lower in the group treated with PQ. Such results were  
1060 replicated in a study done by Smithuis et al (2010) in Myanmar. In this study five  
1061 groups of approximately 160 volunteers each all with uncomplicated *P. falciparum*  
1062 malaria received various ACT treatments. In each group, half the volunteers  
1063 received a onetime dose of primaquine of 0.75mg/kg. All volunteers receiving  
1064 primaquine has approximately a 12-fold reduction in gametocyte carriage by light  
1065 microscopy (rate ratio 11.9, 95% CI 7.4-20.5,  $p < 0.0001$ ). In Sudan however, there  
1066 was no benefit in adding a onetime dose of primaquine to SP +AS therapy in  
1067 asymptomatic adults with submicroscopic *P. falciparum* parasitemia (El-Sayed,  
1068 2007) In this study baseline gametocyte prevalence by RT-PCR was only 12%. The  
1069 evidence, taken as a whole, suggests that artemisinin treatment lowers  
1070 gametocytemia, with a onetime primaquine dose appearing to further this effect in  
1071 most studies. However, this evidence does not confirm a reduction in  
1072 transmissibility since the transmissibility of gametocytes cannot be determined by  
1073 light microscopy alone. None of these studies included confirmatory evidence of  
1074 patient to vector transmission.



1075 Besides the beneficial effects of primaquine on gametocyte carriage, another study  
1076 done in South Africa examined the relationship between drug resistance and  
1077 gametocyte carriage (Barnes, 2008). Over a 5 year period, in an area of low  
1078 transmission where SP was used as first line therapy, as the amount of resistance to  
1079 SP increased (as manifested by genetic mutations in dhfr and dhsp genes), so did  
1080 the density and duration of peripheral gametocytemia. The geometric mean density  
1081 for parasites with genetic mutations conferring resistance to SP was 1212  
1082 gametocytes/mcL/week while for parasites without these mutations, the geomean  
1083 was 60.8 gametocytes/mcL/week ( $p=0.014$ ). The duration of gametocytemia in the  
1084 two groups was 45.4 weeks versus 7 weeks respectively ( $p=0.016$ ). Despite the  
1085 increasing number of genetic mutations conferring resistance to SP over time, the  
1086 drug remained effective in treating acute infections, suggesting the mechanism of  
1087 increased gametocytemia was not due to increased numbers of asexual parasites  
1088 circulating due to primary drug failure. Although SP is not used for treatment of  
1089 malaria in Cambodia, the lessons learned from this study regarding the relationship  
1090 between drug resistance and increased density and duration of gametocyte carriage  
1091 are important to note. This study will monitor for the development of resistance to DP  
1092 over a three-year period; if evidence for resistance is seen, there may be a resulting  
1093 effect on gametocytemia (increase in density or polyclonality for example),  
1094 underscoring the need for an effective transmission blocking medication such as  
1095 primaquine to reduce gametocytemia to be incorporated as part of the overall control  
1096 strategy.  
1097

### 1098 **3.4.1 Primaquine in G6PD deficiency**

1099 Glucose-6-phosphate dehydrogenase is an enzyme which is crucial in controlling  
1100 cellular oxidative stress, and patients who are deficient in this enzyme can undergo  
1101 hemolysis when given primaquine. There are gradations in the degree of G6PD  
1102 deficiency, thus volunteers have different tolerances for primaquine. Testing at  
1103 enrollment in this study will identify any volunteers who are G6PD deficient. Under  
1104 an AFRIMS malaria drug resistance surveillance protocol (WR 1576), nearly 10.5%  
1105 of all malaria patients were G6PD deficient by fluorescence testing. However, it is  
1106 unclear whether the rates in malaria patients reflect that in the general population.  
1107 Because of the potential for hemolytic anemia induced by primaquine in G6PD-  
1108 deficient patients, current national guidelines in Cambodia provide for the use of  
1109 primaquine only where laboratory screening tests for G6PD are available (see  
1110 Appendix A). However, in most locations in Cambodia, G6PD testing is not  
1111 available, resulting in the de facto absence of primaquine use.

1112 There have been limited studies of G6PD deficiency in Cambodia, including  
1113 unpublished data collected over the past 3 years by AFRIMS which revealed a  
1114 prevalence of approximately 10-15% in the populations to be studied. This number  
1115 has remained relatively constant. Previous reports reveal the common genotypic  
1116 variants encountered in Cambodia to be Viangchan, Mahidol, Union and Coimbra.  
1117 These are mild to moderate variants (WHO Class II and III) although phenotypic



1118 variation among genotypic variants can be significant and has not been well studied.  
1119 In one previous study in Cambodian males, 15 mg of primaquine for 14 days  
1120 resulted in a mean 21% drop in hematocrits (Everett *et al.*, 1977). A single dose of  
1121 45 mg is unlikely to lead to clinically significant hemolysis, even in G6PD deficient  
1122 individuals, although evidence is limited.

1123 Safe doses of primaquine in G6PD deficient volunteers have been determined and  
1124 are generally accepted. Primaquine for radical cure of the hypnozoite stages of *P.*  
1125 *vivax* or *P. ovale* requires 14 days of therapy. A recent review by Myint *et al.*  
1126 (unpublished) from 1948-2009 found 33 clinical studies using primaquine which  
1127 included more than 500 G6PD-deficient patients. There were roughly 300 patients  
1128 who presented primaquine-induced hemolysis in 20 studies, with a reduction in  
1129 hematocrit ranging from 4% - 23%, all of whom were G6PD deficient. This included  
1130 40 patients in 7 studies who were reported to have their primaquine stopped  
1131 because of clinical concerns, and only 25 cases from 5 studies who required blood  
1132 transfusion. Changing from a daily dose for 14 days to a weekly dose of 45 mg of  
1133 primaquine for eight weeks did not cause significant hemolysis in G6PD deficient  
1134 African-Americans (Alving *et al.*, 1960). This 8 week treatment dose of 45 mg per  
1135 week is still considered safe in G6PD deficient patients, and recommended by US  
1136 CDC.

1137  
1138 A study in Myanmar (n=22), found that primaquine 45 mg single dose to treat *P.*  
1139 *falciparum* gametocytes and 45 mg weekly x 8 weeks for radical cure of *P.vivax*  
1140 malaria was safe and effective in G6PD-deficient volunteers (Kyaw *et al.*, 1994).  
1141 Additional studies on the use of primaquine in malaria-infected patients with G6PD  
1142 deficiency in Thailand and Japan showed that the drug was safe and effective  
1143 without evidence of hemolytic anemia (Charoenlarp *et al.*, 1972). Despite this, other  
1144 studies have reported that serious hemolytic reactions can occur with small doses  
1145 and also with even single doses of primaquine 45 mg (Ziai *et al.*, 1967; Reeve *et al.*,  
1146 1992). In WR 1737, there were 72 *P. vivax* patients from the study who were treated  
1147 with PQ at discharge, including 13 G6PD deficiency cases (18%) who received  
1148 45mg single dose/week for 8 weeks. Only 2 of 13 had a hematocrit drop > 10%  
1149 (less than 15%), and both were transient and resolved within 1-2 weeks. Overall PQ  
1150 was well tolerated, and there were few reported side effects associated with PQ,  
1151 most commonly muscle pain and abdominal discomfort.

1152  
1153 In this study, all volunteers will be tested for G6PD deficiency although  
1154 randomization to single dose of primaquine will not be based on G6PD status. All  
1155 volunteers will have a CBC done the day before and the day after primaquine  
1156 treatment to assess for any hemolysis. The hematocrit will be rechecked on days 7  
1157 and 14 for those volunteers who are found to be G6PD deficient to ensure that no  
1158 significant hemolysis occurs. Although it would be easy to advocate for exclusion of  
1159 G6PD-deficient volunteers, the principle of 'justice' suggest that G6PD deficient  
1160 volunteers should be included - they are at equal risk for malaria and would benefit  
1161 from the research.



### 1162 **3.5 Mosquito infection by membrane feeding**

1163

1164 Assessment of the efficacy of DP and DP/PQ on peripheral gametocytemia and  
1165 potential transmissibility of infection will be done by multiple methods. First, the  
1166 prevalence of gametocytemia at baseline and before and after treatment will be  
1167 determined by light microscopy as well as PCR. As outlined above, both DP and PQ  
1168 are thought to have gametocidal action although affecting different stages of the  
1169 gametocyte life cycle; therefore the use of DP alone as well as DP/PQ will be  
1170 important to evaluate the potential effect of a onetime dose of PQ on transmission of  
1171 infection.

1172

1173 In addition to the prevalence of gametocytemia, it will be beneficial to assess  
1174 whether DP or DP/PQ affects the actual transmission of gametocytes to female  
1175 *Anopheles* mosquitoes, indicating risk reduction for ongoing malaria transmission in  
1176 the community. This is particularly pertinent since gametocyte densities are often  
1177 submicroscopic yet capable to transmitting infection. The Department of Entomology  
1178 at AFRIMS has developed an *Anopheles* mosquito membrane feeding assay used in  
1179 several previous studies. This assay is mainly used to produce infectious  
1180 sporozoites to be used for various laboratory assays at AFRIMS, although most  
1181 recently this assay has been successfully used to conduct *P. vivax* human malaria  
1182 challenges at WRAIR using mosquitoes transported from Thailand to the United  
1183 States.

1184

1185 In human challenge studies conducted under WRAIR #1308 (Principal Investigator:  
1186 Dr. Ratawan Ubalee), *P. vivax* infected volunteers are recruited and enrolled at the  
1187 Thai Ministry of Public Health (MOPH) Malaria Clinics in Mae Sod, Thailand.  
1188 Samples of *P. vivax* infected blood are collected and fed via membrane feeding  
1189 apparatus to colony-reared *Anopheles dirus* mosquitoes from the AFRIMS  
1190 Entomology Lab. Membrane feeding has been determined to be highly efficient with  
1191 over 80% mosquito infection rates typically observed (Prachumshri, unpublished).  
1192 After screening donor blood for potential co-infections (including HIV, HBV, HCV,  
1193 Syphilis, JE virus, CK virus, and microfilariae), infected mosquitoes are transported  
1194 by commercial airliner to the US with the remainder of sporozoite development  
1195 occurring at the WRAIR Division of Entomology insectary. Approximately 16-24  
1196 days after feeds, salivary gland sporozoite development is complete, and the  
1197 mosquitoes are used to feed on human volunteers. These studies are FDA-  
1198 regulated and conducted under IND and have been indispensable in evaluation of *P.*  
1199 *vivax* vaccine candidates.

1200

1201 This same concept of infecting mosquitoes with a membrane feeding assay will be  
1202 used in this study; although with a goal of determining if an antimalarial regimen (DP  
1203 or DP/PQ) is effective in killing all stages of gametocytes and preventing malaria  
1204 transmission to *Anopheles* mosquitoes, and thus the population at large. Mosquitoes  
1205 will feed via membrane feeding apparatus on blood drawn from volunteers, and then  
1206 the fed mosquitoes selected and incubated in appropriate environmental conditions  
1207 according to Entomology SOPs at the insectary located at Anlong Veng MTF. At



1208 nine days post-feed, half of the mosquitoes will be dissected by a trained technician  
1209 and any midgut oocysts, which indicates transmissible gametocytes were indeed  
1210 present in the blood, enumerated. For the remaining half of the mosquitoes, half will  
1211 be dissected and oocysts/midguts preserved for future molecular analysis and half  
1212 will remain in the incubators for another approximately seven days (16 days post  
1213 feeding), or the length of time it takes to develop salivary gland sporozoites. At this  
1214 stage, these mosquitoes will then be preserved for molecular analysis.  
1215

1216 While the membrane feeding assays is well developed and a reliable assay for  
1217 producing *Plasmodium*-infected mosquitoes with infectious salivary gland  
1218 sporozoites, the use of this membrane feeding assay to look for midgut oocysts and  
1219 sporozoite development in patients with clinical malaria infection is exploratory. An  
1220 important secondary objective of this protocol is to attempt to standardize this assay  
1221 for efficient application in the field (i.e., it would not be used as supportive data in a  
1222 501K application to the FDA). A well-validated membrane feeding assay will be an  
1223 important tool for developing and ensuring the feasibility of malaria elimination.  
1224 AFRIMS in partnership with CNM is well positioned to develop a definitive and easily  
1225 applicable assay in the field.  
1226

1227 This effort represents an opportunity for technology transfer and capacity building in  
1228 the development and implementation of the membrane feeding assay. Identified  
1229 personnel from the community, RCAF and/or CNM will train at AFRIMS prior to  
1230 commencement of this study in maintenance of colony-reared *Anopheles*  
1231 mosquitoes, midgut dissection, oocyst enumeration and preservation, and  
1232 sporozoites for molecular analysis and membrane feeding techniques. Female  
1233 *Anopheles* mosquitoes will be raised at AFRIMS labs in Bangkok will be transported  
1234 to study sites weekly for use. AFRIMS will support CNM and local entomologists to  
1235 maintain the appropriate standard operating procedures necessary to conduct the  
1236 assay in a reproducible fashion. Mosquitoes will be stored in secure containment  
1237 facilities during transport and while on site.

## 1238 **4 STUDY OBJECTIVES**

1239

### 1240 **4.1 Primary Objectives**

1241

- 1242 1. To monitor therapeutic efficacy (based on rates of recurrence at 42 days) and  
1243 search for evidence of drug resistance of a fixed-dose 3 day regimen of DHA-  
1244 piperazine (DP), with and without a dose of primaquine, in volunteers with  
1245 uncomplicated *P. falciparum* infection in Cambodia over a 3-year observation  
1246 period.  
1247
- 1248 2. To establish the transmission blocking (sexual stage) efficacy of the  
1249 prescribed drug regimen with or without a single oral 45 mg dose of  
1250 primaquine.





1251

1252 **4.2 Secondary Objectives:**

1253

1254 1. To document the safety and tolerability of DHA-piperaquine, including the  
1255 effect on the electrocardiogram (EKG), particularly the QTc interval, in  
1256 patients taking 3 day treatment courses of DHA-piperaquine.

1257

1258 2. Assess the degree of antimalarial drug resistance in the parasite populations  
1259 in Cambodia by correlating 42 day rates of malaria recurrence clinical and  
1260 pharmacodynamic outcomes (parasite clearance) with pharmacokinetic drug  
1261 levels, *in vitro* drug susceptibility testing, genomic studies and molecular  
1262 markers of drug resistance.

1263

1264

1265 3. To quantify the reduction in sexual stage parasites (gametocytes) of the two  
1266 treatment regimens assessed by 3 methods on volunteers' samples – light  
1267 microscopy, PCR and a mosquito membrane-feeding assay.

1268

1269 4. Assess the relative contributions of clinical history, baseline immunity levels  
1270 and parasitologic parameters associated with prior infection on clinical  
1271 outcome and parasitological responses *in vivo*.

1272

1273 5. To build host nation capacity, with emphasis on training laboratory, clinical  
1274 and entomological scientists to conduct antimalarial therapeutic efficacy and  
1275 drug resistance studies.

1276

1277 6. To cryopreserve parasite isolates to standardize antimalarial resistance  
1278 surveillance monitoring methods *in vitro*.

1279

1280 7. To provide up-to-date antimalarial efficacy data to the Cambodian  
1281 government, including CNM and Ministry of National Defense, to help  
1282 determine the appropriate regimens of DHA-piperaquine and primaquine for  
1283 the treatment of uncomplicated malaria.

1284

1285 8. To harmonize clinical and laboratory approaches to characterizing  
1286 antimalarial drug resistance between DoD-GEIS overseas labs including,  
1287 AFRIMS, USAMRU-K, and others.

1288

1289 9. To characterize falciparum population genetic structure and study the  
1290 transmissibility of genetic variants to mosquitoes by membrane feeding.

1291



1292 **5 STUDY DESIGN**

1293

1294 **5.1 Overview**

1295

1296 This is an active open label **Treatment Study** evaluating the efficacy, safety,  
1297 tolerability and pharmacokinetics of a standard three day course of  
1298 Dihydroartemisinin-Piperaquine (DP) in uncomplicated *P. falciparum* malaria.  
1299 This study will continue over an estimated 3-year period to observe and  
1300 document any changes in resistance patterns to this first-line ACT treatment  
1301 regimen. Cardiac safety monitoring will be conducted with focus on peak QTc  
1302 values on day 3 during convalescence to avoid the confounding effects of fever  
1303 and tachycardia.

1304

1305 On day 3 of DP therapy, volunteers will be randomized to receive a one-time  
1306 dose of 45 mg of primaquine or no treatment. For volunteers receiving PQ, the  
1307 onetime dose will be administered on the same day, at least 2 hours after  
1308 ingestion of DP. Investigators will be able to detect any difference in therapeutic  
1309 efficacy of DP versus DP-PQ as well any effects of primaquine on persistence of  
1310 gametocytemia and, using membrane feeding assays, on the transmissibility of  
1311 *P. falciparum* infection.

1312

1313 Follow-up for all volunteers will occur over approximately 42 days with weekly  
1314 peripheral blood smears with PCR correction to detect any malaria infection  
1315 occurring during this time period. Malaria smears will be performed if malaria  
1316 symptoms are experienced outside the scheduled visits. If the volunteer develops  
1317 a malaria recurrence, blood will be drawn for resistance markers and piperazine  
1318 levels, and the volunteer treated with an alternative regimen based on national  
1319 policy guidelines for either *P. falciparum* or *P. vivax*.

1320

1321 **5.2 Endpoints**

1322

1323 The main objectives of this study are as stated in Section 4: to measure the 42-  
1324 day clinical efficacy of the antimalarial drug regimen of DHA-piperaquine, with  
1325 and without a 45 mg dose of primaquine, over a 3 year period in selected areas  
1326 of Cambodia where malaria transmission is actively occurring. Secondly, the  
1327 study will aim to detect any beneficial effects of a onetime dose of primaquine  
1328 after completion of therapy for blood stage infection on gametocytemia that may  
1329 persist after DP treatment. To achieve these objectives, the following endpoints  
1330 will be executed.

1331

1332

1333



1334  
1335  
1336  
1337  
1338  
1339  
1340  
1341  
1342  
1343  
1344  
1345  
1346  
1347  
1348  
1349  
1350  
1351  
1352  
1353  
1354  
  
1355  
1356  
1357  
  
1358  
1359  
  
1360  
1361  
1362  
1363  
  
1364  
1365  
1366  
  
1367  
1368  
  
1369  
1370  
1371  
1372  
1373

**Primary Endpoints:**

1. Efficacy rates at 42 days (with 95% confidence intervals) for DP with and without single dose primaquine for uncomplicated *P. falciparum* diagnosed by positive PCR-corrected malaria microscopy.
2. Comparative rates of sexual stage infections at days 1, 4, 7 and 14 between patients dosed with and without primaquine based on a combined endpoint of light microscopy, PCR analysis for detection of gametocytes and mosquito membrane feeding assay.

**Secondary Endpoints**

1. Efficacy rate at 28 days (with 95% confidence intervals) for DHA-piperaquine for uncomplicated *P. falciparum* diagnosed by positive PCR-corrected malaria microscopy.
2. 28- and 42-day comparative asexual and sexual efficacy rates of DHA-piperaquine with and without single dose primaquine for uncomplicated *P. falciparum*
3. Kaplan-Meier survival analysis of asexual and sexual blood stage efficacy at days 7 and 14, and analysis of asexual stage only at days 21, 28, 35 and 42.
4. Comparative reduction in mosquito oocyst prevalence at days 4, 7 and 14 post-treatment for DP and DP-PQ.
5. Comparative rates, duration and intensity of treatment-related adverse drug events, and total adverse events in each treatment group, including rates of QTcF interval prolongation on EKG during the convalescent phase of disease.
6. Pharmacokinetic drug levels of piperaquine at select time points (including day of failure if a recrudescence), and primaquine on the day following treatment.
7. Drug resistance against locally available antimalarial drugs based on patterns of *in vitro* parasite growth inhibition (IC<sub>50</sub>).
8. Estimate of apparent rates of preexisting immunity to malaria based on medical history, days of fever prior to presentation, antibody levels, and presenting parasitological parameters (eg. gametocytemia, low asexual stage parasitemias) and the relative contribution of these parameters to clinical and parasitological outcomes.



- 1374 9. Incidence of qualitative and quantitative G6PD deficiency in the study  
1375 population
- 1376 10. Rates of relapse with *P. vivax* malaria during the study.
- 1377 11. Using genomic tools, evaluate the complexity of infection and genetic  
1378 diversity of malaria parasites in the major life cycle stages- asexual,  
1379 gametocytes, oocysts and sporozoites.

### 1380 **5.3 Sample Size**

1381  
1382 The primary end-point for sample size purposes will be 42 day efficacy of DP for  
1383 uncomplicated *P. falciparum*. Estimates of treatment cure rates and 95% CIs  
1384 (exact) will be reported on at least an annual basis until the surveillance activity  
1385 ceases or changes substantially (eg, a new first-line ACT is introduced, or there  
1386 is no longer an interest by Cambodian authorities in monitoring DHA-piperaquine  
1387 efficacy). The intended sample size will be 150 evaluable subjects. Using a  
1388 point estimate for 42 day efficacy of 94%, the 95% confidence interval for the  
1389 estimate of true efficacy will be approximately 89-97% (n = 150).

1390  
1391 Volunteers developing malaria will randomized to either 45mg single dose  
1392 primaquine or no primaquine treatment on day 3 of DP treatment and the effects  
1393 of PQ on the sexual stage gametocytes will be explored. There are no statistical  
1394 assumptions or power calculations for this analysis as it remains exploratory –  
1395 little data is available on which to develop assumptions. The purpose of this  
1396 effort is to gather preliminary data on gametocyte carriage rates, and gather  
1397 quantitative evidence on the effects of single dose primaquine on the sexual  
1398 parasite stage.

1399

### 1400 **5.4 Duration of Volunteer Participation**

1401  
1402 Volunteers who enroll in the study will be treated and followed for a minimum of  
1403 42 days with discharge from the study at that time if demonstrated cure of  
1404 malaria infection. In prior published studies using DP in Southeast Asia, efficacy  
1405 is estimated to be 98% for a 3-day regimen (Krudsood, 2007). The exact length of  
1406 follow-up of the cohort will be determined by the number of volunteers developing  
1407 recurrent malaria during the 42- day follow-up period. Volunteers that have a  
1408 malaria recurrence during the 42 day treatment follow-up period will be re-treated  
1409 for blood stage malaria under national guidelines and continue follow-up for the  
1410 remainder of the 42-day period. If blood stage malaria recurs in week 5 or 6 of  
1411 the study, volunteers may have follow-up extended until they have clinical  
1412 resolution of symptoms and two negative blood smears at least one week apart.

1413



## 1414 **5.5 Study Group Descriptions**

1415  
1416 Patients assessed as having uncomplicated malaria will be enrolled in open label  
1417 fashion to a 3-day treatment course of DHA-piperazine (DP) by directly  
1418 observed therapy (DOT) at the MTF. All patients will receive a total of 9 tablets  
1419 containing 40mg DHA and 320mg of piperazine in divided doses at 0, 24 and  
1420 48 hours (3 tablets once per day) for the 3 day course. Medication compliance  
1421 for malaria treatment will be assured by directly observed therapy by study  
1422 personnel during dosing. At completion of DP treatment volunteers will be  
1423 randomized in an open label fashion to receive a single 45 mg dose of  
1424 primaquine or no therapy, and this will also be administered under directly  
1425 observed therapy at the MTF. All volunteers will then be followed approximately  
1426 42 days to evaluate study objectives and endpoints.  
1427

## 1428 **5.6 Population to be Studied**

1429  
1430 The study population will include adult (age 18 - 65 years) civilian and military  
1431 volunteers living in areas determined to have high incidence rates of malaria  
1432 based on current estimates by AFRIMS, CNM and the RCAF health services.  
1433 Active duty military personnel will be required to obtain permission from their  
1434 Commanders prior to enrolling. Pregnant volunteers will be excluded from  
1435 participation in the study, due to risk of teratogenicity from artemisinin  
1436 derivatives. Children and adolescents will not be enrolled in this study.  
1437

## 1438 **5.7 Study Sites and Selection of the Study Population**

### 1439 **5.7.1 Population Characteristics**

1440 General characteristics of the intended study populations in Cambodia are listed  
1441 below. See Background Section 3.2 for full details.

- 1442
- 1443 • Ethnic composition: Khmer 98-99% and Vietnamese 1-2 %
  - 1444 • Typical living condition: relatively poor, majority farmers (corn, bean or peanut  
1445 plantations) and loggers.
  - 1446 • There are two different population groups living in the area:
    - 1447 ○ Long term residents, living in the area for more than 5 years, most of  
1448 whom own the land they are working on.
    - 1449 ○ New residents who remain a minority but make up a fast-growing segment  
1450 of the population in many border areas. The majority have moved to  
1451 border areas in the past few years, coming from other Eastern provinces  
1452 in Cambodia, (such as Kampong Cham, Takeo, and Kandal Province).  
1453 New residents mostly make a living in forestry, hunting or as laborers, and  
1454 in these trades are thought to be the group most affected by malaria. They



1455 also have more limited access the health care system and develop severe  
1456 malaria more frequently than long term residents.

1457 • The average annual income for an individual in Cambodia is approximately  
1458 2,100 USD (CIA, 2010).

1459 • Level of education: Mostly primary and secondary school only, but according  
1460 to official statistics most of the population over 18 years is literate (95%).

1461

## 1462 **5.8 Description of Test Article**

1463

1464 The test article during the Treatment Study will be the commercially available  
1465 product Duo-Cotecxin, manufactured by Zhejiang Holley Nanhu Pharmaceutical  
1466 Co., Ltd (see Appendix B for Package insert). This is the current first-line ACT  
1467 recommended for in WHO containment Zone 1 in Cambodia (along the western  
1468 border with Thailand). The test article will be procured through the CNM, who  
1469 will use the current government-approved manufacturer. The IRBs will be  
1470 provided with a package insert, should CNM switch procurement policy to import  
1471 DHA-piperaquine from an alternative manufacturer. This is a combination tablet  
1472 containing 40 mg of dihydroartemisinin and 320mg of piperaquine phosphate in  
1473 each tablet. Certificates of analysis from the manufacturer will be provided to the  
1474 IRBs, along with independent analysis reports from AFRIMS Pharmacology lab  
1475 for DHA-piperaquine prior to study start.

1476

1477 Primaquine phosphate will be obtained from The Government Pharmaceutical  
1478 Organization (GPO), Bangkok, Thailand. Medication will be supplied in 15 mg  
1479 tablets to ensure the correct dose is administered (see Appendix C for Package  
1480 insert).

1481

### 1482 **5.8.1 Packaging and Labeling of the Test Articles**

1483

1484 The test articles will be used in the original commercial packaging, but  
1485 administered by study personnel as described in section 6.7.

1486

### 1487 **5.8.2 Storage of Test Articles**

1488

1489 The test articles will be stored in a cool, dry place below 30° C in a light-proof  
1490 container. The test articles will remain under secure custody of the study team at  
1491 all times.

1492

1493



## 1494 **5.9 Monitoring of Clinical Subject Safety**

1495

1496 See Section 6.9 for full details regarding clinical assessments of Volunteer  
1497 safety. Briefly, volunteers will be monitored during all phases of the study for  
1498 adverse events. The most important component of monitoring will include the  
1499 active malaria case detection and treatment which is the focus of the study.  
1500 Treatment related adverse events are relatively rare at therapeutic doses with DP  
1501 but include disturbances in cardiac potassium channel conductance which can  
1502 prolong the QT interval on the EKG although to date there is not good evidence  
1503 of clinically significant QT prolongation at therapeutic doses to be used in this  
1504 study (see Section 3.3). EKGs will be monitored for QTc interval prolongation  
1505 with focus on the period of peak drug concentration (day 3 post-dose), while the  
1506 patient is in the convalescent phase of illness to avoid confounding by fever and  
1507 tachycardia. Oversight and expert review of EKGs will be provided by a Cardiac  
1508 Data Safety Monitoring Board (see Sections 6.15 and Appendix F). Neurological  
1509 toxicity is rare at therapeutic dihydroartemisinin doses but has been reported and  
1510 will be monitored as part of routine clinical assessments which include a directed  
1511 physical exam to further investigate neurological complaints as appropriate.

1512

1513 Primaquine in G6PD deficient patients can potentially cause hemolysis although  
1514 most often seen in prolonged 14-day therapy for radical cure. A one-time dose of  
1515 45 mg will be given in this study with a CBC performed in all volunteers on the  
1516 day prior and day post-therapy, as well as on Day 7 and 14 for G6PD deficient  
1517 volunteers as outlined in Table 1. Although there is little or no risk in G6PD-  
1518 normal patients, primaquine has the potential to induce hemolytic anemia in  
1519 G6PD-deficient patients. G6PD-deficient subjects with anemia at enrollment will  
1520 be carefully evaluated by the investigator and excluded if there is evidence of  
1521 clinically significant anemia. A CBC will be obtained at enrollment with repeat  
1522 CBC on day 3 following the primaquine dose. Additional CBC monitoring will be  
1523 performed if the hematocrit drops more than 10% on the day following the  
1524 primaquine dose compared to the previous day, with CBCs repeated on days 7  
1525 and 14 after enrollment.

1526

1527 Subjects with signs of severe malaria at presentation may require treatment for  
1528 severe malaria with parenteral therapy according to the Cambodian national  
1529 guidelines (Appendix A). Severe malaria by WHO criteria is defined as coma or  
1530 seizures, pulmonary edema, shock, renal failure, jaundice, severe anemia,  
1531 spontaneous bleeding, hyperparasitemia (>5% RBCs infected), or prostration.  
1532 While uncomplicated malaria often presents with mild hepatic and/or renal  
1533 insufficiency, the criteria defining severe malaria with regard to renal and hepatic  
1534 insufficiency are based on clinical evidence of organ dysfunction (oliguria and/or  
1535 jaundice). Therefore, subjects with mild subclinical renal and/or hepatic  
1536 insufficiency as evidenced by clinical lab value abnormalities alone do not require  
1537 parenteral therapy under the national treatment guidelines. To date there is no  
1538 evidence in the literature that the pharmacokinetics of either drug is altered  
1539 substantially in subclinical hepatic or renal insufficiency, and this study may in

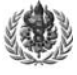

1540 fact add evidence in this regard with careful measurement of both  
1541 pharmacokinetics and renal and hepatic laboratory monitoring as outlined in the  
1542 protocol.

CONFIDENTIAL





## 1543 **6 METHODS**

### 1544 **6.1 Recruitment of Study Volunteers**

1545  
1546 Potential volunteers will be identified by the study team and/or local medical  
1547 providers when they present with uncomplicated *P. falciparum* or *P.*  
1548 *falciparum/vivax* malaria. Volunteers who present with danger signs indicating  
1549 severe or complicated malaria infection will not be enrolled, but will be treated  
1550 under current national guidelines for treatment of severe malaria. If the potential  
1551 volunteer agrees to consider enrolling, the local staff will contact the study team  
1552 immediately for enrollment. The study team will be based at two medical  
1553 treatment facilities (MTF) in Battambang Referral Hospital, Battambang Province,  
1554 and Along Veng Referral Hospital, Anlong Veng District.

1555  
1556 A one-page information sheet in Khmer will be provided to local health care  
1557 providers in the areas. This information will be verbally presented to potential  
1558 volunteers and any questions answered. If the volunteer wishes to participate in  
1559 the study, local health care providers will contact study staff who will then initiate  
1560 informed consent procedures. Volunteers who have already enrolled in this  
1561 study, received DP and successfully completed a 42-day follow-up period of the  
1562 study or have received an alternative curative treatment course of antimalarials  
1563 by the study investigators, can elect to screen for the study again should he/she  
1564 develop uncomplicated malaria infection.

1565  
1566 It is estimated that there will be up to 300 volunteers screened to obtain 150  
1567 evaluable subjects.

1568

### 1569 **6.2 Informed Consent Process**

1570  
1571 Informed consent is a process that is initiated prior to the individual's agreeing to  
1572 participate in the study and continuing throughout the individual's study  
1573 participation. Extensive discussion of risks and possible benefits of participation  
1574 in this study will be provided to the volunteers and their families. Following the  
1575 study briefing, volunteers will be given the opportunity to discuss questions of a  
1576 personal nature privately with the investigators and/or the ombudsman if desired  
1577 following the briefing. An ombudsman is an independent individual with  
1578 knowledge of the study not involved in study procedures who will meet with  
1579 prospective active duty military volunteers to answer questions, and counsel  
1580 them that they are not required to participate in the study, and may leave at any  
1581 time without penalty or fear of reprisal (see also Section 10.10).

1582  
1583 Consent forms in the local language (Khmer) describing in detail the study  
1584 procedures and risks will be given to the volunteer and written documentation of



1585 informed consent will be obtained prior to enrollment in the study. Consent forms  
1586 will be IRB approved and the volunteer will be asked to read and review the  
1587 document. If the volunteer cannot read the content of the consent form, it will be  
1588 read and explained to him/her in Khmer by the study investigator obtaining the  
1589 informed consent with the presence of a witness or ombudsman; thus any  
1590 potential volunteer must be able to speak and understand Khmer. Upon  
1591 reviewing the document, the study personnel will explain the research study to  
1592 the volunteer and answer any questions that may arise. The volunteer will be  
1593 asked to sign and date the informed consent document prior to being enrolled in  
1594 the study.

1595  
1596 Special consideration will be given to the recruitment process for military  
1597 personnel. The Chain of Command will not be involved in the recruitment of  
1598 military personnel and will not encourage or order soldiers to participate in a  
1599 research study. Per DOD Directive 3216.2, an ombudsman will be employed  
1600 when conducting group briefings with active duty personnel to ensure that  
1601 volunteers have been told that participation is voluntary. The ombudsman will be  
1602 present in other situations as appropriate, and will be available to volunteers to  
1603 answer questions. Volunteers will have the opportunity to discuss the study with  
1604 the assigned unit ombudsmen if military personnel or think about it prior to  
1605 agreeing to participate.

1606  
1607 One witness will sign and date the consent form in the presence of the participant  
1608 attesting that the requirements for informed consent have been satisfied and that  
1609 consent is voluntary and freely given by the volunteer without any element of  
1610 force, fraud, deceit, duress, coercion, or undue influence. Participation in the  
1611 study will be voluntary and volunteers will be informed that they may withdraw  
1612 consent at any time throughout the course of the study. Following ICH guidelines  
1613 a signed copy of the informed consent document will be given to the volunteers  
1614 for their records. The rights and welfare of the volunteers will be protected by  
1615 emphasizing to them that the quality of their medical care will not be adversely  
1616 affected if they decline to participate in this study.

1617

### 1618 **6.3 Determination of Eligibility**

1619 Volunteers not meeting all study inclusion and/or exclusion criteria will not be  
1620 enrolled into the study. A screening log will be kept of all who were evaluated for  
1621 participation to document who was and was not enrolled and reason for not  
1622 enrolling in the study.

1623

#### 1624 **6.3.1 Inclusion Criteria**

1625

1626 Volunteers meeting all of the following criteria will be considered eligible for  
1627 enrollment in the study:

1628



- 1629 1. Volunteer with uncomplicated *P. falciparum* malaria (volunteers with mixed  
1630 *P. falciparum* and *P. vivax* infections may be enrolled), 18-65 years of age  
1631
- 1632 2. Baseline asexual parasite density between 1,000-200,000 parasites/ $\mu$ L  
1633
- 1634 3. Able to provide informed consent  
1635
- 1636 4. Available and agree to follow-up for anticipated study duration including 3  
1637 day treatment course at the MTF and weekly follow-up for the 42-day  
1638 period  
1639
- 1640 5. Authorized by local commander to participate if active duty military  
1641

### 1642 6.3.2 Exclusion Criteria

1643

1644 Volunteers meeting any of the following criteria will be excluded from the study:

1645

- 1646 1. Allergic reaction or contraindication to DHA, piperaquine or primaquine  
1647
- 1648 2. Significant acute comorbidity requiring urgent medical intervention  
1649
- 1650 3. Signs/symptoms and parasitological confirmation of severe malaria  
1651
- 1652 4. Use of any anti-malarial within the past 14 days.  
1653
- 1654 5. Class I or II G6PD deficiency (defined as severe) as determined at  
1655 screening  
1656
- 1657 6. Pregnant or lactating female, or female of childbearing age, up to 50 years  
1658 of age, who does not agree to use an acceptable form of contraception  
1659 during the study  
1660
- 1661 7. Clinically significant abnormal EKG, including a QTcF interval > 500 ms at  
1662 enrollment.  
1663
- 1664 8. Known or suspected concomitant use of QTc prolonging medications.  
1665
- 1666 9. Judged by the investigator to be otherwise unsuitable for study  
1667 participation  
1668

1669 WHO guidelines state that in uncomplicated malaria in pregnant women,  
1670 artemisinin combination treatment should only be used starting in the second  
1671 trimester, with use in the first trimester only if no other effective treatment is  
1672 available. Therefore, avoidance of conception during the potential period of  
1673 treatment in the study is warranted. The guidelines on contraceptive use are



1674 based on FDA guidance M3 “Nonclinical Safety Studies for the Conduct of  
1675 Human Clinical Trials for Pharmaceuticals” which describes safety considerations  
1676 for the inclusion of women of childbearing age in studies of healthy volunteers.  
1677 This guidance is nearly identical to that of ICH M3. The guidance requires that a  
1678 highly effective method of birth control be used by women of childbearing age in  
1679 healthy volunteer studies. According to the published guidance, “A highly  
1680 effective method of birth control is defined as one that results in a low failure rate  
1681 (i.e., less than 1 percent per year) when used consistently and correctly, such as  
1682 implants, injectables, combined oral contraceptives, some intrauterine  
1683 contraceptive devices (IUDs), sexual abstinence, or a vasectomized partner. For  
1684 volunteers using a hormonal contraceptive method, information regarding the  
1685 product under evaluation and its potential effect on the contraceptive should be  
1686 addressed.” The guidelines are noteworthy for omitting mention of women who  
1687 have undergone surgical sterilization (these individuals would be included in the  
1688 study) in addition to vasectomized partners. Clinically significant drug-drug  
1689 interaction with hormonal contraceptives appears unlikely. Piperazine  
1690 undergoes very little metabolic transformation in humans and as a result is  
1691 unlikely to affect the level of hormonal contraceptives (Liu et al, 2007).  
1692 Artesunate and dihydroartemisinin are not extensively metabolized in liver, and  
1693 there is no significant effect on the cytochrome P450 enzyme system (in vitro  
1694 data) (Bangchang et al, 1992; Barradell & Fitton, 1995a).

1695  
1696 At study entry, females will be counseled to agree to avoid becoming pregnant  
1697 during their entire participation in the study, and for at least one month after the  
1698 last dose of study medication. Female volunteers who suspect that they may be  
1699 pregnant will be instructed to inform study personnel as soon as possible.

1700  
1701 All females between the age of 18 and 50 will be screened with a urine  
1702 pregnancy test at baseline. Pregnant or lactating females, and females of  
1703 childbearing age who do not agree to use a highly effective method of birth  
1704 control will be excluded from participation in the study. Females found to be  
1705 pregnant at screening will be treated according to current Cambodian national  
1706 malaria treatment guidelines for the treatment of malaria in pregnancy published  
1707 by the Ministry of Health.

1708  
1709 In the highly unlikely event that a female volunteer becomes pregnant during the  
1710 3 days of malaria treatment following an initial negative urine pregnancy test at  
1711 the initiation of treatment, she will be discontinued from study medication and will  
1712 be treated according to current Cambodian national malaria treatment guidelines  
1713 for the treatment of malaria in pregnancy published by the Ministry of Health. If a  
1714 woman is found to be pregnant less than 1 month after completing a course of  
1715 study medication, she will be followed for safety at 3, 6 and 9 months at which  
1716 time the health and birth weight of the child will be assessed. All such  
1717 pregnancies temporally associated with study drug administration will be reported  
1718 to the IRBs urgently.

1719



1720

## 6.4 Screening Procedures

1721

1722 Following documentation of informed consent and determination of eligibility,  
1723 study volunteers will have

1724

1725

- Initial targeted medical history and physical examination performed by a study physician, including a directed prior clinical history of malaria, and an electrocardiogram (EKG).

1726

1727

1728

- Volunteers will have blood drawn for
  - malaria smear/PCR correction (including malaria parasite densities, both asexual and sexual stages)
  - Malaria antibody titer(s) to one or more antigens,
  - CBC

1729

1730

1731

1732

1733

- Remaining blood from CBC sample will be frozen at -20 ° C for hemoglobin typing assay

1734

1735

1736

1737

1738

1739

1740

1741

1742

1743

- G6PD activity and G6PD genotyping
- Baseline renal function and liver function testing
- Parasite drug resistance characterization *in vitro*
- Analysis of molecular markers of infection to include PCR genotyping
- Baseline pharmacokinetic drug level (including *ex vivo* *P. falciparum* bioassay)
- *ex vivo* mosquito membrane feeding assay
- Gametocyte PCR
- Electrolytes to include serum calcium, potassium and magnesium

1744

1745

1746

1747

1748

1749

1750

- Volunteers with significant electrolyte deficiencies will be given oral supplementation.
- Counseling will be provided to volunteers who are found to be G6PD deficient, and the study team will explain ramifications for future drug treatment. A G6PD deficiency alert card will also be provided for subject safety which may be presented to the subject's primary care givers.

1751

## 6.5 Randomization and Volunteer Assignment

1752

1753

1754

1755

1756

1757

1758

1759

1760

1761

Volunteers who enroll will be administered the first dose of DHA-piperaquine (DP) by DOT at the medical treatment facility if they meet all eligibility criteria. Volunteers with uncomplicated *P. falciparum* malaria who meet inclusion and exclusion criteria and complete a 3-day course of DHA-piperaquine will be randomized to either 45mg single dose primaquine or no primaquine treatment on day 3 of DP therapy. Treatment will be directly observed in volunteer observation at the MTF.



1762 **6.6 Blinding**

1763

1764 Although this is an open label (unblinded) study, microscopists are blinded to each  
1765 others' readings and to study drug regimen. There is otherwise no blinding during  
1766 the study.

1767

1768 **6.7 Administration of Test Article**

1769

1770 Volunteers will receive a total of 9 tablets of DP for the 3 day course. Each tablet  
1771 contains 40mg DHA and 320mg of piperazine. Volunteers will receive 3 days of  
1772 treatment: 3 tablets on day 1 (at the time of diagnosis), and at 24 and 48 hours  
1773 later ( $\pm$  1 hour). Medication compliance for all malaria treatment will be assured  
1774 by directly observed therapy by study personnel during dosing. Only those study  
1775 personnel designated by the Principal Investigators will be authorized to  
1776 administer the test article.

1777

1778 Study drug will be administered following at least 3 hours of fasting where  
1779 possible. At enrollment, volunteers will be queried regarding last meal  
1780 consumption and the time noted. However, the first dose of study drug  
1781 administration will not be delayed unnecessarily if the volunteer has consumed  
1782 food within the past 3 hours. On subsequent doses, study drug will be  
1783 administered following at least a 3 hour fast.

1784

1785 On Day 3 of DP administration, primaquine (45 mg) will be given to the  
1786 volunteers who were randomized to receive primaquine treatment. Primaquine  
1787 will be given by DOT, three tablets of 15 mg each, as described above following  
1788 the DHA-piperazine post-dose EKG (scheduled at approximately 52 hours).

1789

1790 Volunteers already treated for malaria initially under the protocol who  
1791 subsequently develop primary blood stage *P. vivax* or who have an apparent  
1792 relapse from latent liver-stage disease will be treated according to current  
1793 Cambodian national malaria treatment guidelines, which includes a three day  
1794 course of an ACT to clear blood stage infection. Because DHA-piperazine is  
1795 the study drug, an alternative 1<sup>st</sup> or 2<sup>nd</sup> line agent will be used for blood stage *P.*  
1796 *vivax* treatment. Currently given the high prevalence of *P. vivax* in Cambodia  
1797 and chance for re-infection, radical cure with 14 days of primaquine is  
1798 recommended only in settings able to screen for G6PD deficiency and provide  
1799 primaquine and appropriate follow-up. Subjects may be treated by the study  
1800 team or referred as appropriate to prevent relapse. Any other blood stage  
1801 antimalarial medications used during the study, to include Rescue Therapy for  
1802 recrudescence *P. falciparum* malaria will be supplied by the CNM and  
1803 administered by the Study Team (which includes CNM Physicians) according to  
1804 current national guidelines for antimalarial treatment (Appendix A).

1805



1806 The test articles will be obtained from a commercial supplier through the CNM  
1807 and the GPO, Thailand. Any unused medications remaining at the end of the  
1808 study will be provided to the Battambang Referral Hospital, Battambang  
1809 Province, and Along Veng Referral Hospital, Anlong Veng District for clinical use.  
1810 All other antimalarial medications used during the study will be supplied through  
1811 the CNM and administered by the Study Team according to current national  
1812 guidelines for antimalarial treatment.  
1813

## 1814 **6.8 Concomitant Medications**

1815  
1816 Use of concomitant medications will be evaluated by the investigator at each  
1817 clinical encounter with the volunteer. Use of antimalarials or drugs with known  
1818 antimalarial activity other than those prescribed by an investigator during the  
1819 study will not be permitted. While drugs that interact with or otherwise have a  
1820 known unfavorable impact on the outcomes of interest in the study will be  
1821 avoided by investigators during the malaria treatment phase, there are no other  
1822 explicitly restricted concomitant medications during this study.  
1823

## 1824 **6.9 Clinical Assessments**

1825  
1826 During treatment, volunteers will have

- 1827 • Vital signs including temperature, blood pressure, pulse and respirations  
1828 evaluated at 4 and 8 hours after the first dose of medication, then every 8  
1829 hours until discharged
- 1830 • An electrocardiogram (EKG study) will be performed at 4 hours following  
1831 the first treatment dose, and at predose and 4 hours after the third dose.  
1832 The average QTcF interval from 3 consecutive evaluable 10 second  
1833 tracings will be measured. If the QTcF interval has both increased from  
1834 screening, and is prolonged more than 480 ms (grade 2), additional EKGs  
1835 will be performed before and 4 hours after the second dose. Sustained  
1836 study drug-related QTcF prolongations greater than 500 ms (grade 3) on  
1837 two separate EKG studies at least 15 minutes apart will be followed to  
1838 resolution to predose values at 2-4 hour intervals as determined by the  
1839 investigator. The DSMB will be notified of all prolongations greater than  
1840 500ms, and be provided with EKGs and a written report for review (see  
1841 DSMB charter).
- 1842 • Volunteers with significant electrolyte deficiencies at screening who are  
1843 given supplementation may have serum electrolyte levels repeated as  
1844 appropriate to determine whether supplementation was effective.
- 1845 • Blood drawn for malaria smears and PCR correction at 4 and 8 hours after  
1846 the first dose of medication, then every 8 hours until 2 consecutive  
1847 negative smears are obtained. Malaria smears will be evaluated for both  
1848 asexual and sexual stage (gametocyte) density.



- 1849 • Blood will be collected again for CBC, piperazine drug level (including *ex vivo* *P. falciparum* bioassay), analysis of molecular markers of resistance
- 1850 (with PCR genotyping), and gametocyte PCR at 24, and 48 hours after the
- 1851 initiation of treatment. PK drug levels will also be collected at 4 and 52
- 1852 hours (peak drug concentration).
- 1853
- 1854 • At 72 hours, the volunteer will have blood collected for malaria smear/PCR
- 1855 correction, PK (primaquine and piperazine) drug levels, CBC, analysis of
- 1856 molecular markers (with PCR genotyping), gametocyte PCR and mosquito
- 1857 membrane feeding.
- 1858 • The volunteer will be then discharged at the 72 hour visit after completing
- 1859 all procedures for out-patient volunteer follow-up if there is documentation
- 1860 of 2 consecutive negative blood smears. If infection persists, blood smears
- 1861 will continue to be prepared and read every 8 hours until 2 negative
- 1862 smears are obtained. If volunteer meets criteria for early treatment failure
- 1863 (see Section 8.2), the volunteer will be treated according to the
- 1864 Cambodian National Malaria Program Treatment Guidelines.
- 1865

1866 Volunteers will be followed weekly thereafter on days 7, 14, 21, 28, and 35 (-2 to

1867 +3 days):

1868 Days 7,14

- 1869 • All volunteers will have a brief clinical evaluation
- 1870 • Blood will be drawn for
  - 1871 ○ Malaria smear/PCR correction
  - 1872 ○ piperazine drug level (with *P.f.* bioassay)
  - 1873 ○ mosquito membrane feeding
  - 1874 ○ Gametocyte PCR
  - 1875 ○ Dried filter paper spot(s) will be made from available blood for
  - 1876 molecular marker analyses to be done at UNC
  - 1877 ○ CBC for G6PD-deficient volunteers ONLY
- 1878 • EKG Study
- 1879

1880 Days 21, 28, 35 (-2 to +3 days)

- 1881 • All volunteers will have a brief clinical evaluation,
- 1882 • Blood will be drawn for
  - 1883 ○ Malaria smear/PCR correction
  - 1884 ○ Optional CBC for all volunteers who are G6PD deficient if
  - 1885 needed
  - 1886 ○ Piperazine drug level (with *P.f.* bioassay)
- 1887 • Optional EKG study if persistent QTcF prolongations
- 1888

1889 At the conclusion of the 42 day (-2 to +3 days) follow-up period, volunteers will

- 1890 have blood drawn for
- 1891 • Malaria blood smear/PCR correction (with follow-up as per recrudescence
  - 1892 if positive)
  - 1893 • Piperazine drug level





- 1894 • Malaria antibody levels
- 1895 • Urine pregnancy test for all females
- 1896 • Optional EKG study if persistent QTcF prolongations
- 1897
- 1898 All volunteers with suspected recurrent malaria symptoms during the follow-up
- 1899 period will be re-evaluated by microscopy, and if positive for malaria will be
- 1900 • Urine pregnancy test for all females (prior to administration of medication)
- 1901 • Have blood drawn (prior to administration of medication) for
- 1902     o Malaria blood smear/PCR correction
- 1903     o *In vitro* drug susceptibility characterization
- 1904     o Molecular markers of resistance (with PCR genotyping)
- 1905     o Drug level for piperaquine
- 1906     o Malaria antibody levels, CBC, electrolytes, renal and liver function
- 1907     o testing
- 1908     o Gametocyte PCR
- 1909 • EKG
- 1910 • Treated under directly observed therapy based on current national malaria
- 1911 treatment guidelines for Cambodia.
- 1912
- 1913 If negative for malaria, the volunteer will be referred for evaluation and treatment
- 1914 of alternative diagnoses to the appropriate healthcare service providers.
- 1915
- 1916 Volunteers found to have recurrent malaria after initial re-treatment with first line
- 1917 ACT therapy will be treated with rescue therapy following current national
- 1918 guidelines. At the time of writing, this includes treatment with artesunate and
- 1919 mefloquine (see Appendix A). Blood smears following rescue therapy will be
- 1920 collected daily until resolution by 2 negative smears, at least 6 hours apart. Any
- 1921 volunteer who requires alternative anti-malarial treatments because of treatment
- 1922 failure/recrudescence will still be followed for a 42-day period. Volunteer
- 1923 participation may be extended to allow for completion of malaria treatment with
- 1924 documentation of two negative blood smears, and a final follow-up visit with
- 1925 smear one week later.
- 1926

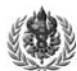

1927  
1928  
1929

Table 1. Table of times and events

| Event                                                                           | Malaria Diagnosis | 4 hr           | 24 hr          | 48 hr          | 72 hr          | MTF Dis <sup>5</sup> | Week 01           | Wk 02             | Wk 03           | Wk 04           | Wk 05           | Wk 06               | Malaria Recur  |
|---------------------------------------------------------------------------------|-------------------|----------------|----------------|----------------|----------------|----------------------|-------------------|-------------------|-----------------|-----------------|-----------------|---------------------|----------------|
| a. Informed Consent                                                             | x                 |                |                |                |                |                      |                   |                   |                 |                 |                 |                     |                |
| b. Medical History                                                              | x                 |                |                |                |                |                      |                   |                   |                 |                 |                 |                     |                |
| c. Physical Exam                                                                | x                 |                |                |                |                |                      |                   |                   |                 |                 |                 |                     | x              |
| d. Brief clinical evaluation <sup>1</sup>                                       |                   |                | x              | x              | x              | x                    | x                 | x                 | x               | x               | x               | x                   | x              |
| e. Malaria smear with PCR correction and vital signs <sup>2</sup>               | x                 | x <sup>2</sup> | x <sup>2</sup> | x <sup>2</sup> | x <sup>2</sup> | x <sup>2</sup>       | x                 | x                 | x <sup>10</sup> | x <sup>10</sup> | x <sup>10</sup> | 3.5 mL <sup>7</sup> | x              |
| f. Piperaquine/primaquine drug level <sup>9</sup>                               | 3 mL              | 2mL            | 2 mL           | 5 mL           | 3 mL           |                      | 2 mL              | 2 mL              | 2mL             | 2mL             | 2mL             | 2 mL                | 2mL            |
| g. Malaria antibody levels                                                      | 5 mL              |                |                |                |                |                      |                   |                   |                 |                 |                 | 5 mL                | 5 mL           |
| h. Renal, Liver Function, Electrolytes                                          | 2 mL              |                |                |                |                |                      |                   |                   |                 |                 |                 |                     | 2mL            |
| i. CBC                                                                          | 3 mL <sup>8</sup> |                | 2 mL           | 2 mL           | 2 mL           |                      | 2 mL <sup>3</sup> | 2 mL <sup>3</sup> |                 |                 |                 |                     | 2mL            |
| j. Parasite culture <i>in vitro</i> resistance                                  | 8 mL              |                |                |                |                |                      |                   |                   |                 |                 |                 |                     | 8mL            |
| k. Molecular resistance markers <sup>10</sup> (+ PCR genotyping <sup>11</sup> ) | 6 mL              |                | 6mL            | 6mL            | 6mL            |                      |                   |                   |                 |                 |                 |                     | 6mL            |
| l. G6PD                                                                         | 0.5 mL            |                |                |                |                |                      |                   |                   |                 |                 |                 |                     |                |
| m. Gametocyte PCR <sup>10</sup>                                                 | 2.5 mL            |                | 2.5 mL         | 2.5 mL         | 2.5 mL         |                      | 3 mL              | 3 mL              |                 |                 |                 |                     | 2.5mL          |
| n. Urine pregnancy test (all female volunteers)                                 | x                 |                |                |                |                |                      |                   |                   |                 |                 |                 | x                   | x              |
| o. Malaria treatment <sup>4</sup>                                               | x                 |                | x              | x              |                |                      |                   |                   |                 |                 |                 |                     | x <sup>6</sup> |
| p. Mosquito membrane feeding                                                    | 2 mL              |                |                |                | 2mL            |                      | 2 mL              | 2mL               |                 |                 |                 |                     |                |
| q. EKG study <sup>12</sup>                                                      | x                 | x              | 12             | x, x           |                |                      | x                 | x                 | 12              | 12              | 12              | 12                  | x              |
| Daily phlebotomy in mL                                                          | 32                | 2              | 12.5           | 15.5           | 15.5           |                      | 7                 | 7                 | 2               | 2               | 2               | 10.5                | 27.5           |
| Cumulative phlebotomy (approx mL)                                               | 32                | 34             | 46.5           | 62             | 77.5           | 77.5                 | 84.5              | 93.5              | 95.5            | 97.5            | 99.5            | 109.5               | (137.0)        |

1930  
1931  
1932  
1933  
1934  
1935  
1936  
1937  
1938  
1939  
1940  
1941

- Brief clinical evaluation includes an interval medical history, vital signs and a directed physical exam daily as clinically indicated.
- Malaria smears/PCR correction and Vital signs to include temperature, blood pressure, pulse and respiratory rate will be done at 0, 4 and 8 hours, and then every 8 hours thereafter until the subject has had 2 negative blood smears at least 6 hours apart. Vital signs will be taken daily after two negative smears.
- Only drawn for G6PD deficient volunteers
- Patients will receive fixed dose 3 day course of DHA-piperaquine in equally divided doses at 0, 24 and 48 hours. On day 3 of therapy, after the post-dose EKG study has been obtained, volunteers will be randomized open label to receive either 45 mg of primaquine or no primaquine treatment. Medication compliance for all malaria treatment will be assured by directly observed therapy.
- Volunteers will be discharged from the MTF once they are afebrile and have had 2 consecutive negative malaria smears at least 6 hours apart.
- For Volunteers that have recurrent malaria following treatment with DHA-piperaquine, treatment will be according to current national treatment guidelines for Cambodia.
- Estimated 3.5 mL for total blood drawn by fingerstick over entire study period. For volunteers with recrudescence at week 5 or 6, additional fingersticks beyond Day 42 may be done to document parasite clearance.

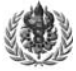

- 1942  
1943  
1944  
1945  
1946  
1947  
1948  
1949  
1950  
1951  
1952
8. CBC sample at baseline will include hemoglobin typing performed at a commercial lab
  9. Piperaquine level drawn at 0, 4, 24, 48, 52, 72 hours and Days 7,14, 21, 28, 35 and 42. Ex vivo activity of patient plasma against *P. falciparum* (bioassay) in culture will also be determined at these time points. Primaquine levels will be drawn at 52 and 72 hours. Note that on day 3 (48 hours) a total of 5 mL will be drawn at 48 (2mL) and 52 hours (3mL).
  10. Molecular resistance markers will include a filter paper blood spot(s) prepared from the 6 mL draw at 24,48 and 72 hours. On Day 7, 14, and recurrence 500 microliters are added to gametocyte PCR blood draw for filter paper spot(s) for molecular marker analyses. Filter paper blood spots will be prepared on days 21, 28 and 35 from the fingerstick malaria smear.
  11. PCR genotyping: 1 mL will be aliquoted from the 6 mL draw for PCR genotyping
  12. An EKG study to assess the average QTcF on 3 consecutive evaluable 10 second tracings will be performed at screening, 4 hours post dose, 48 and 52 hours post dose, and week 1 and 2, and recurrence day. Additional EKGs may be performed to monitor QTc prolongations and adverse events beyond the scheduled time points as determined by the investigator – see Section 6.9.

CONFIDENTIAL

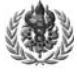

1953 **6.10 Specimen (or Data) Collection and Testing**

1954 **6.10.1 Specimens to be Collected**

1955

1956 The following specimens will be collected as outlined in the schedule in Tables 1

1957

1958 • Fingertick capillary or venous blood will be collected for **blood smears by light**  
1959 **microscopy** to determine parasite species and to quantify asexual and sexual  
1960 parasitemia (approximately 200-250 $\mu$ L of blood per sample). PCR correction  
1961 assay, to confirm parasite speciation, will be done on Day 1, if malaria recurs and  
1962 other specified time points indicated by study investigators.

1963

1964 • **Hematology** to include hemoglobin, hematocrit, WBC count and differential,  
1965 platelet count, and cell indices. Approximately 2 ml per blood draw will be  
1966 collected in an EDTA (anticoagulant) tube. At baseline screening only, 3 mL of  
1967 blood will be drawn and the blood remaining from CBC will be saved to perform  
1968 **hemoglobin typing**.

1969

1970 • **Renal Function** (creatinine, urea), **Liver Function Tests** (aspartate  
1971 aminotransferase, alanine aminotransferase, alkaline phosphatase, total bilirubin)  
1972 and Electrolytes (potassium, magnesium and calcium). Approximately 2 ml per  
1973 blood draw will be collected in a serum separator blood tube.

1974

1975 • **Glucose-6-phosphatase deficiency** Approximately 0.5 mL per blood draw will  
1976 be collected in an EDTA (anticoagulant) tube will be evaluated by fluorescence  
1977 (qualitative) testing, quantitative testing and with single nucleotide polymorphism  
1978 (SNP) analysis. Approximately 0.5 mL per blood draw will be collected in an  
1979 EDTA (anticoagulant) tube.

1980

1981 • **Malaria antibody titers** to malaria antigens (approximately 5 ml) in a serum  
1982 separator tube.

1983

1984 • Volunteers will have 8 mL blood in sodium heparin tube drawn for malaria  
1985 parasite culture and **in vitro drug resistance** testing before medication dosing  
1986 and will be repeated at the time of diagnosis for any malaria recurrence.

1987

1988 • Volunteers will have 6 mL of blood drawn in EDTA tubes for analysis of  
1989 **molecular markers** of malaria parasite drug resistance before medication  
1990 dosing, and at 24, 48 and 72 hours after the first dose and the time of diagnosis  
1991 for any malaria recurrence. From this 6ml of blood, 200-400  $\mu$ l of blood will be  
1992 spotted on filter paper and dried for stabilization of DNA and RNA, and **1 mL** will  
1993 be aliquoted to the AFRMS laboratory for **PCR genotyping**. Filter paper spots  
1994 will also be prepared during follow-up visits scheduled for days 7 through 42 from  
1995 either the 3 mL of blood drawn for gametocyte PCR, or blood smear PCR  
1996 correction on those days.

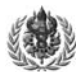

1997  
1998  
1999  
2000  
2001  
2002  
2003  
2004  
2005  
2006  
2007  
2008  
2009  
2010  
2011  
2012  
2013  
2014  
2015  
2016  
2017  
2018  
2019  
2020  
2021

- **Drug levels** of piperazine and primaquine will be drawn (totaling 2 ml of blood for each drug) for pharmacokinetic profiles and *ex vivo* Plasmodium falciparum bioassay. Piperazine levels will be drawn pre-dose and each dosing day of DP: 4, 24, 48, 52 and 72 hours. Given the long half-life, levels will also be drawn on Day 7, 14, 21, 28, 35, 42 and at any recrudescence. Primaquine levels will be drawn at 52 and 72 hours (after PQ dosing).
- **Membrane Feeding Assay** will be performed under SOP in concert with personnel from AFRIMS Department of Entomology. Two mLs in heparinized tubes will be drawn on Days 1, 4, 7, and 14, and within six hours, the assay will be performed at the MTFs.
- **Gametocyte PCR** will be conducted on 2.5 mL of blood drawn into Paxgene tubes or other appropriate tubes for RNA isolation on Days 1, 2, 3, 4, 7, 14 and at the time of any malaria recurrence. This PCR assay is a multiplex assay designed to detect presence of early or late stage gametocyte genes for both for *P. falciparum* and *P. vivax*. On Day 7, 14 an extra 0.5 mL of blood will be drawn with the 2.5 mL but this will be used for filter paper spots for molecular markers of resistance.
- **Urine pregnancy test:** Urine beta-HCG test. All female volunteers age 18-50 will undergo a pregnancy test on screening day and 42 day post-treatment follow-up. Pregnant women will not be eligible for entry into the study.

2022  
2023

## 6.10.2 Specimen Preparation, Processing, Handling, and Storage

2024  
2025  
2026  
2027  
2028  
2029

**A. Malaria Microscopy** - Stained thick and thin blood smears will be examined by two microscopists who are blinded to each other's results and to the treatment status of the study volunteer. Two blood smears will be made for every enrolled volunteer. Slide 1 will be stained immediately and examination of giemsa stained thick and thin smears. This slide will then be stored in a different box from slide 2, which will only be read there is a problem with the first slide.

2030  
2031  
2032  
2033  
2034  
2035  
2036  
2037  
2038

Parasite densities will be calculated based on a count of parasites per 200 WBCs (thick film) or for low parasitemias (eg., 10 parasites/microliter), per 500 WBC or 5000 RBCs (thin film). Both asexual and sexual stages will be enumerated. A total of 200 oil immersion fields will be examined on the thick film before a blood smear is considered negative. The final count will be determined by taking the geometric mean of the two counts. In case of a difference in results (positive/negative; species diagnosis) between the two microscopists, the blood smear will be re-examined by a third microscopist blinded to the results of the first two readers and the treatment regimen, and the third reading will be accepted as the final result.

2039  
2040

Malaria microscopy results will be confirmed using real-time PCR correction for the detection of *P. falciparum* and *P. vivax* using 18S ribosomal RNA (18S rRNA)



2041 genes unique to each species. Parasite DNA will be isolated from approximately  
2042 200-250  $\mu$ L of venous or capillary blood collected in an EDTA microtube.

2043

2044 **B. PCR Genotyping** One mL of blood will be drawn on Days 1,2,3,4 and at  
2045 recurrence. PCR genotyping of msp1, msp2 and GLURP genes will be performed to  
2046 identify the unique fingerprint of the infecting parasite and any subsequent  
2047 development of malaria after DP therapy in order to determine if it is a recrudescant  
2048 infection or new infecting genotype.

2049

2050 **C. Hematology** for safety assessment will include the following:

2051

- 2052 • hemoglobin
- 2053 • hematocrit
- 2054 • red blood cell (RBC) count
- 2055 • cell indices
- 2056 • platelet count
- 2057 • white blood cell (WBC) count and differential count
- 2058 • polymorphonuclear leukocytes (neutrophils)
- 2059 • lymphocytes
- 2060 • eosinophils
- 2061 • monocytes

2062 **D. Hemoglobin Typing:** Blood will be drawn for baseline CBC in EDTA tube. 1.5  
2063 mL of whole blood will be washed with normal saline, pelleted and frozen at -20° C.  
2064 The samples will be batched and transported to a predesignated commercial lab,  
2065 Thalassemia Research Center, Institute of Molecular Biosciences, Mahidol  
2066 University, for hemoglobin typing analysis within 1 month using HPLC or other  
2067 appropriate commercially available method. Molecular analysis will be performed at  
2068 the commercial lab and/or AFRIMS in case the initial qualitative result is  
2069 inconclusive.

2070

2071 **E. Liver and Renal Function Tests** for safety assessment will include the  
2072 following:

2073

- 2074 • blood urea nitrogen
- 2075 • creatinine
- 2076 • total bilirubin
- 2077 • aspartate aminotransferase
- 2078 • alanine aminotransferase
- 2079 • alkaline phosphatase
- 2080 • potassium
- 2081 • magnesium
- 2082 • calcium

2083

2084



2085

2086 **F. G6PD Deficiency Testing**

2087 Volunteers will be assessed with both fluorescence (qualitative) and quantitative  
2088 testing, with single nucleotide polymorphism analysis on enrollment. . Approximately  
2089 0.5 mL per blood draw will be collected in an EDTA (anticoagulant) tube.

2090 Venous blood will be tested for qualitative G6PD activity using the fluorescent spot  
2091 test method, as is recommended by the International Committee for Standardization  
2092 in Hematology using commercially available kits (R&D Diagnostics Ltd, Greece).  
2093 This method detects fluorescence of NADPH under long-wave (365 nm) UV light.  
2094 Reduction of NADP to NADPH occurs in the presence of G6PD. The rate and extent  
2095 of NADPH formation is proportional to G6PD activity. Normal samples fluoresce  
2096 brightly, whereas deficient samples show little or no fluorescence.

2097 Quantitative testing will be performed using an FDA-approved test kit (Trinity  
2098 Biotech, Ireland) and results will be calculated based on same-day hemoglobin  
2099 values from the complete blood count. Severe deficiency (WHO Class I or II) will be  
2100 defined as 10% or less of the lower limit of normal activity (in G6PD activity units per  
2101 gram of hemoglobin) established for the quantitative assay system. Subjects with  
2102 severe deficiency will not be enrolled in the study as this is an exclusion criteria;  
2103 Class III, IV and V deficiencies are permissible for enrolment.

2104 For single nucleotide polymorphism (SNP) analysis, DNA will be extracted from ~ 0.5  
2105 ml of blood collected in EDTA, and the G6PD gene will be genotyped according to  
2106 established methods (Fujii et al., 1984). The five SNPs to be evaluated at AFRIMS  
2107 are: Mahidol (G487A), Viangchan (G871A), Chinese-5 (C1024T), Union (G1360T),  
2108 Canton/Kaiping (G1376T/G1388T). Genotype data may be compared against  
2109 existing databases, such as sequence data from other samples located in publicly  
2110 accessible database(s) for example GENBANK. **No human genetic studies will be**  
2111 **performed other than to assess G6PD genotypes and hemoglobin typing.**  
2112

2113 **G. Malaria Antibody Analysis.** This will include but not be limited to testing for *P.*  
2114 *falciparum* and *vivax* antibodies such as to MSP-1 (Merozoite Surface Protein 1)  
2115 and/or MSP-3a antigens. Analysis will be conducted at baseline, at study end, and  
2116 at any time the volunteer develops blood stage malaria (first infection or a  
2117 recurrence). Antimalarial *P. falciparum* and *P. vivax* antibody levels will be  
2118 measured in order to assess pre-existing and/or exposure-related antimalarial  
2119 immunity. Samples will be analyzed by Enzyme-Linked ImmunoSorbent Assay  
2120 (ELISA) and/or a chemiluminescence-based assay(s). Note that 'MSP-1' is used as  
2121 a reference antigen; however, antibodies to multiple malaria antigens may be  
2122 assessed under this protocol.

2123  
2124 **H. In vitro drug sensitivity.** For *P. falciparum* monoinfection and mixed *P.*  
2125 *falciparum* and other parasite species infections, approximately eight mL of  
2126 heparinized blood will undergo in vitro drug sensitivity testing at AFRIMS using



2127 established methods (Noedl et al., 2004 and Noedl, 2005) with both fresh and  
2128 cryopreserved cultures incubated against commonly used antimalarials in the region.  
2129 Results using AFRIMS primary method (HRP-2 ELISA) vs. USAMRU-K and  
2130 WRAIR's SYBR-Green assay will be compared. A portion of the specimen will be  
2131 cryopreserved according to established procedures. Culture adaptation will be  
2132 performed either at AFRIMS or other collaborating laboratories according to  
2133 established methods (Trager and Jensen, 1997).

2134

2135 **I. Molecular Marker analysis.** To study genetic markers of resistance and  
2136 population genetics of malaria in Cambodia, parasite DNA will be extracted from ~6  
2137 mL of WBC-depleted blood collected in EDTA and stored at -20°C or below using a  
2138 an appropriate DNA extraction kit. On Days 1, 2, 3, 4 filter paper blood spots will be  
2139 prepared from the original 6mL sample, dried and stored at room temperature.  
2140 Additionally, filter paper blood spots will prepared from venous blood drawn on Days  
2141 7 and 14 of follow up (from gametocyte PCR samples). DNA and RNA will be  
2142 extracted from filter paper blood spots using an appropriate method. Samples will be  
2143 analyzed by the University of North Carolina under Cooperative Research and  
2144 Development Agreement with WRAIR (on file).

2145

2146 **J. Membrane Feeding Assay.** A laboratory colony of *An. dirus* established and  
2147 maintained at the Department of Entomology, Armed Forces Research Institute of  
2148 Medical Sciences (AFRIMS), in Bangkok, Thailand for more than 25 years will be  
2149 used. This mosquito species is reared under laboratory conditions at ca. 26°C ± 2  
2150 and at a relative humidity of about 75% under a photo regime of 12:12 h (L:D). Fish  
2151 food (C.P. Hi Pro®, Bangkok, Thailand) will be used to feed larvae on a regular  
2152 basis. Mosquitoes will be provided cotton soaked with 10% multivitamin for an  
2153 energy source until used in the experiments. The membrane feeding assay will be  
2154 performed according to Department of Entomology SOPs. Briefly, two mL of blood  
2155 will be drawn for mosquito membrane feeding on 1 (pre-dose), 4 (day 1 post  
2156 primaquine), and days 7 and 14. Two hundred mosquitoes will be fed using a  
2157 membrane feeding apparatus on fresh volunteer blood no more than 6 hours after  
2158 blood draw. Of the mosquitoes determined to have taken a blood meal, half will be  
2159 separated for oocyst evaluation by phase-contrast microscopy; or engorged  
2160 mosquitoes will be separated from un-engorged mosquitoes and then incubated  
2161 under appropriate environmental conditions. Half of them will be dissected after 9  
2162 days for oocyst evaluation and count the number with  $\geq 1$  midgut oocyst(s) by  
2163 phase-contrast microscopy. Fifty percent of the remaining will be separated for  
2164 preservation for molecular analysis. The remaining 50% of mosquitoes will continue  
2165 to be incubated for approximately seven more days (day 16 post feeding), until  
2166 sporozoite development in the salivary glands is complete. The mosquitoes will then  
2167 be preserved in 95% Ethanol to be sent to UNC for parasite detection and genomic  
2168 analysis.

2169

2170 **K. Gametocyte PCR.** A PCR assay for detection of *P. falciparum* and *P. vivax*  
2171 sexual stage gametocytes will be performed at AFRIMS to evaluate both presence  
2172 and stage of gametocyte development. For this assay 2.5 mL of blood will be





2173 collected in PAXgene Blood RNA Tubes and the RNA processed using PAXgene  
2174 Blood RNA Kits (or similar collection tubes as appropriate). Filter paper blood spots  
2175 may also be prepared for limited analysis. RNA templates from each extraction will  
2176 be used for each reverse transcriptase PCR reaction to detect the early and late  
2177 stage gametocyte genes.

2178

2179 **L. Pharmacokinetics (PK)** - Plasma samples for determining antimalarial drug  
2180 levels of piperazine and primaquine (2 ml of whole blood per blood draw) will be  
2181 collected from all volunteers at the specified time points for analysis by high  
2182 performance liquid chromatography with mass spectrometry (LC-MS) using  
2183 departmental SOPs for bioanalytical chemistry analysis by LC-MS. A small aliquot  
2184 of the plasma sample will be used to determine ex vivo antimalarial activity of the  
2185 subjects blood using an established assay against *P. falciparum* (Noedl *et al*, 2004).

2186

### 2187 **6.10.3 Specimen Labeling and Shipment**

2188

2189 All specimens collected during the study will be labeled with the participants study ID  
2190 number, date, and time collected. Clinical testing including diagnostics and  
2191 volunteer safety labs will be performed at the study site (G6PD, hematology, renal,  
2192 liver function, electrolytes and microscopy testing). Hemoglobin typing will be  
2193 contracted to a commercial laboratory. Specimens that are stored prior to testing will  
2194 be labeled to indicate the type of test(s) to be performed. Parasitology testing  
2195 including parasite culture, *in vitro* resistance, and/or molecular characterization will  
2196 be performed at AFRIMS reference lab in Cambodia or Thailand (parasite DNA and  
2197 additional testing for volunteer safety assessment). Parasite genetic analysis on  
2198 coded, de-identified samples will be performed at the University of North Carolina  
2199 under an approved Cooperative Research and Development Agreement with  
2200 AFRIMS and the WRAIR. The documents are currently on file with the WRAIR  
2201 Office of Research and Technology Administration Office. A permit to ship samples  
2202 outside Cambodia under this protocol will be obtained from the National Institute of  
2203 Public Health, Cambodia (the responsible authority for shipping permits).

2204

2205 Specimens that cannot be analyzed on-site will regularly be shipped from the field to  
2206 AFRIMS in Bangkok, and/or the University of North Carolina laboratories for further  
2207 processing and analysis. In the event of remaining specimens, the University of  
2208 North Carolina laboratories will return or destroy all specimens after all analytic  
2209 methods have been performed and / or no more than three years after data analysis  
2210 is complete.

### 2211 **6.10.4 Specimen Storage and Donation for Future Use**

2212

2213 Following the completion of laboratory analyses as described in this protocol, any  
2214 remaining specimens will be stored in a secure AFRIMS, AFRIMS contract facility or  
2215 partner lab. During the course of the study, they will be regularly transferred to a  
2216 secure facility. Specimen accountability will be maintained by the laboratory



2217 managers, and only study investigators and those named on the Delegation of  
2218 Authority log will have access to the specimens. Samples that are unstable may be  
2219 disposed of with permission of the principal investigators. The remaining specimens  
2220 will be stored for approximately 20 years at the Armed Forces Research Institute of  
2221 Medical Sciences in Bangkok. After the study is completed, residual specimens will  
2222 only used for purposes outlined in the consent form unless permission for other  
2223 analyses are granted by the respective IRBs. Volunteers will indicate on the consent  
2224 form whether or not their samples may be stored and permission granted for future  
2225 use.

## 2226 **6.11 Data Management**

2227  
2228 Clinical and laboratory data pertaining to drug efficacy will be collected and managed  
2229 by AFRIMS Immunology and Medicine in collaboration with AFRIMS Epidemiology  
2230 and Disease Surveillance, using guidelines developed by the World Wide  
2231 Antimalarial Research Network, WHO and/or DoD GEIS (see Appendix D).  
2232 Parasitological data may also be contributed to a central database at WRAIR and  
2233 shared with partner labs. All deidentified data shared with WWARN or DoD GEIS  
2234 will first be published as primary data by the Investigators, and public dissemination  
2235 authorized by the appropriate host country officials before access to other research  
2236 organizations to analyze, publish or disseminate data is granted.

2237  
2238 Source data are all information, original records of clinical findings, observations, or  
2239 other activities in a study necessary for the reconstruction and evaluation of the trial.  
2240 Examples of these original documents and data records include, but are not limited  
2241 to, hospital records, clinical and office charts, laboratory notes, memoranda, or  
2242 evaluation checklists, pharmacy dispensing records, recorded data from automated  
2243 instruments, copies or transcriptions certified after verification as being accurate and  
2244 complete, microfiches, photographic negatives, microfilm or magnetic media, x-rays,  
2245 and volunteer files and records kept at the pharmacy, at the laboratories, and  
2246 medico-technical departments involved in the clinical study. The study site will  
2247 maintain appropriate medical and research records for this trial until completion of  
2248 the study, in compliance with Section 4.9 of ICH E6 GCP, and regulatory and  
2249 institutional requirements for the protection of confidentiality of volunteers. Source  
2250 data will be maintained under supervision of the principal investigator for at least 5  
2251 years after publication of data in per-reviewed journals. Source documents will be  
2252 stored securely at AFRIMS Office in Cambodia under custody of the PI.

2253  
2254 All data and medical information obtained about screened study volunteers will be  
2255 considered privileged and confidential. Volunteers enrolling in the study will be  
2256 issued a unique identification code (UIC), which will be used on all study files and  
2257 clinical sample labels. Individually identifiable volunteer information other than the  
2258 UIC will not be transcribed on other study documents to include laboratory sample  
2259 labels, CRFs, nor will it be included in the presentation of study results.

2260

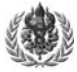

2261 Screened volunteers will be assigned UIC consisting of SN (screening number)  
2262 followed by four digit WRAIR IRB number assigned and a 3-digit number between  
2263 001 and 999 (e.g. 1<sup>st</sup> volunteer: SN1877- 001, 2<sup>nd</sup> volunteer: SN1877-002, etc). The  
2264 entry code for enrolled volunteers is the study name (TB), followed by four digit  
2265 WRAIR IRB number assigned, with a 3-digit number from 001-150 (e.g. 1<sup>st</sup> enrolled  
2266 volunteer: TB1877-001, 2<sup>nd</sup> enrolled volunteer: TB1877-002, etc.).

2267  
2268 The key to the code and documents containing personal information will be kept in a  
2269 secure location with access restricted to named AFRIMS and CNM study personnel  
2270 under control of the Principal Investigator. All personal study volunteer data  
2271 collected and processed for the purposes of this study will be managed by the  
2272 investigators and those listed on the delegation of authority log with adequate  
2273 precautions to ensure the confidentiality of those data, and in accordance with US  
2274 law and/or applicable local laws and regulations where the requirements exceed  
2275 those of US law. The study database will be maintained indefinitely by the Principal  
2276 Investigators with password-protected access limited to listed investigators.

2277  
2278 Monitors, auditors and other authorized agents, the United States Army Medical  
2279 Research and Materiel Command, and the ethics committees approving this  
2280 research will be granted direct access to the study volunteers' original medical  
2281 records for verification of clinical trial procedures and/or data, without violating the  
2282 confidentiality of the volunteers, to the extent permitted by the law and regulations. In  
2283 any presentations of the results of this study at meetings or in publications, the  
2284 volunteers' identity will not be revealed.

### 2285 **6.11.1 Source Documents**

2286  
2287 See section 6.11 above. Source documentation supporting the CRF will indicate the  
2288 volunteer's participation in the study and will document the dates and details of study  
2289 procedures, adverse events and volunteer status. Volunteer pre-existing conditions  
2290 will be recorded in the appropriate sections of the source documentation if they are  
2291 reported by the volunteer after participation has begun, and the Investigator notified  
2292 immediately. Pre-existing conditions not reported by the volunteer at the time of  
2293 enrollment may be grounds for terminating further study participation by the  
2294 Investigator.

### 2295 **6.11.2 Overview of Case Report Forms**

2296  
2297 Appropriate data will be extracted from the source documents in this study onto case  
2298 report forms. The AFRIMS study team will be responsible for completing the CRFs  
2299 as data is collected. The investigator will ensure the accuracy, completeness, and  
2300 timeliness of the data reported in the volunteer's CRF. CRFs will be submitted and  
2301 approved by the IRBs of Record prior to initiation of the research.

2302  
2303 All research data will be collected by the investigator or designee on source  
2304 documents specifically designed for the purposes of conducting the study. Volunteer



2305 clinical and laboratory data for the purpose of providing medical care will be  
2306 recorded in the appropriate clinic or hospital record using existing forms. Volunteer  
2307 data necessary for analysis and reporting will be extracted on Case Report Forms  
2308 specifically designed for that purpose.

### 2309 **6.11.3 Data Compilation**

2310  
2311 All data to be analyzed will be entered from the source documents as electronic  
2312 Case Report Forms into a secure, access controlled database created and managed  
2313 by the Investigative team at AFRIMS. Copies of the completed case report forms  
2314 will be printed and retained by the study team. Data will be entered by trained study  
2315 staff with 100% verification against the source documents by the study monitor. Any  
2316 inconsistencies between the data sets will be corrected by the study team with a  
2317 record kept of the corrections made. Edit checks will be implemented in the data  
2318 entry panel to ensure data quality and accuracy. Responses to requests for further  
2319 clarification of data recorded on the CRF will be answered, dated, and signed by the  
2320 investigator and/or designee. Changes will be implemented in the database and the  
2321 data review and validation procedures will be repeated as needed. All medication  
2322 and adverse event information and textual comments will be proofread for  
2323 consistency between the database and the source documents; the database will be  
2324 corrected appropriately. The study database will be maintained at AFRIMS by the  
2325 Investigative team with password-protected access limited to authorized study team  
2326 members.

### 2327 **6.11.4 Disposition of Data**

2328  
2329 The case report forms, study documentation and a copy of the final report will be  
2330 stored in an access-controlled place in the contracted archives of AFRIMS. All data  
2331 will be retained according to ICH guidelines by the Investigators for 5 years at  
2332 AFRIMS office in Cambodia. After 5 years CNM and RCAF will be consulted  
2333 regarding data disposition or continued storage of raw data, which will be at  
2334 additional cost to these entities.

### 2335 **6.12 Adverse Events**

2336  
2337 An adverse event is any untoward medical occurrence in a volunteer or clinical  
2338 investigation volunteer administered a pharmaceutical product and which does not  
2339 necessarily have a causal relationship with this treatment. An AE can therefore be  
2340 any unfavorable and unintended sign (including an abnormal laboratory finding),  
2341 symptom, or disease temporally associated with the use of a medicinal  
2342 (investigational) product, whether or not related to the medicinal (investigational)  
2343 product.

2344  
2345



2346 **6.12.1 Collecting Adverse Events**

2347

2348 Volunteers treated for malaria with study drug will be carefully monitored for the  
2349 development of adverse events. For the purposes of this study, adverse events will  
2350 be assessed and documented from the beginning of study drug administration until  
2351 discharged from the study, and relationship to study drug assessed. Any evidence of  
2352 adverse event, syndrome or diagnosis occurring post-consent but before drug  
2353 administration will be assessed and documented as “Preexisting”. This information  
2354 will be obtained in the form of open-ended (non-leading) inquiries and from signs  
2355 and symptoms noted during clinical encounters, observations by study staff,  
2356 spontaneous reports from volunteers and other sources as appropriate. Specific  
2357 adverse events will not be solicited in this study. Volunteers will be able to contact  
2358 study staff through assigned unit liaisons in the event of an emergency.

2359

2360 Study investigators will attempt to establish a diagnosis of the event based on signs,  
2361 symptoms, and/or other clinical information. Where possible, the clinical diagnosis  
2362 will be documented as the AE/SAE rather than the individual signs/symptoms. Each  
2363 adverse event will also be described by its duration (start date, time and duration),  
2364 an assessment of its cause (e.g. coexisting disease, concomitant medication, or  
2365 others), its relationship to investigational product (not related, unlikely, possibly,  
2366 probably, definitely), and whether it required specific therapy.

2367

2368 The investigator will also make an assessment of severity for each AE reported  
2369 during the study. The assessment will be based on the investigator’s clinical  
2370 judgment. An AE that is graded as severe should not be confused with a serious  
2371 adverse event (SAE). The severity of each adverse event must be recorded as 1 of  
2372 the choices on the following scale:

2373

- 2374 • Mild - No limitation of usual activities
- 2375 • Moderate - Some limitation of usual activities
- 2376 • Severe - Inability to carry out usual activities

2377

2378 An adverse event (AE) temporally related to participation in the study will be  
2379 documented whether or not considered to be related to the test article. This  
2380 definition includes intercurrent illnesses and injuries and exacerbations of preexisting  
2381 conditions. For each adverse event, the relationship to the study drug must be  
2382 recorded as 1 of the choices on the following scale:

2383

- 2384 • Definite - Causal relationship is certain (ie, the temporal relationship between  
2385 drug exposure and the adverse event onset/course is reasonable, there is a  
2386 clinically compatible response to dechallenge [a rechallenge procedure may  
2387 be used, if necessary], other causes have been eliminated, and the event is  
2388 definitive pharmacologically or phenomenologically)

2389



- 2390 • Probable - High degree of certainty for causal relationship (ie, the temporal  
2391 relationship between drug exposure and the adverse event onset/course is  
2392 reasonable, there is a clinically compatible response to dechallenge  
2393 [rechallenge is not required], and other causes have been eliminated or are  
2394 unlikely)
- 2395
- 2396 • Possible - Causal relationship is uncertain (ie, the temporal relationship  
2397 between drug exposure and the adverse event onset/course is reasonable or  
2398 unknown, dechallenge/rechallenge information is either unknown or  
2399 equivocal, and while other potential causes may or may not exist, a causal  
2400 relationship to the study drug does not appear probable)
- 2401
- 2402 • Unlikely - Not reasonably related (ie, while the temporal relationship between  
2403 drug exposure and the adverse event onset/course does not preclude  
2404 causality, there is a clear alternate cause that is more likely than the study  
2405 drug to have caused the adverse event)
- 2406
- 2407 • Not Related - No possible relationship (ie, the temporal relationship between  
2408 drug exposure and the adverse event onset/course is unreasonable or  
2409 incompatible, or a causal relationship to study drug is implausible)

#### 2410 **6.12.2 Documenting Adverse Events**

2411  
2412 All adverse events will be recorded based on their frequency, severity, and  
2413 relationship to study medication in accordance with current AFRIMS/WRAIR SOP.  
2414 These indices of safety and tolerability among treatment groups will be compared  
2415 using each volunteer as the unit of analysis. Adverse events will be documented in  
2416 the volunteer source documents and case report forms. Adverse events will be  
2417 assessed and recorded by study investigators or their designees. An Investigator  
2418 will review all causality and severity assessments, with final review and  
2419 determination by the Principal Investigator if uncertainty remains.

#### 2420 **6.12.3 Expected Adverse Events**

2421  
2422 All AEs occurring during the course of the clinical trial, defined as from the moment  
2423 of first antimalarial treatment administration until discharge from the study, will be  
2424 collected, documented, and graded by study investigators. Symptoms present at  
2425 enrollment will not be classified as AEs, but any new symptoms or signs occurring  
2426 after this time would constitute adverse events.

2427  
2428 For this study, AEs will include events reported by the volunteer, as well as clinically  
2429 significant abnormal findings on physical examination or laboratory evaluation. A  
2430 new illness, symptom, sign or clinically significant clinical laboratory abnormality or  
2431 worsening of a pre-existing condition or abnormality is considered an AE. Stable  
2432 chronic conditions, such as arthritis, which are present prior to clinical trial entry and  
2433 do not worsen are not considered AEs.



2434  
2435  
2436  
2437  
2438  
2439  
2440  
2441  
  
2442  
2443  
2444  
2445  
2446  
2447  
2448  
2449  
2450  
2451  
2452  
2453  
2454  
  
2455  
  
2456  
2457  
2458  
2459  
  
2460  
2461  
2462  
2463  
  
2464  
  
2465  
  
2466  
2467  
  
2468  
2469  
2470  
2471  
2472  
2473

Adverse events that occur will be treated as clinically indicated where appropriate. The most likely adverse event that will occur during the study is malaria infection. Malaria infection or reoccurrence will be actively sought by the study team, and all suspected cases will be referred immediately for further evaluation and treatment as described in the protocol. It is expected that active detection and treatment by a dedicated team will lead to earlier diagnosis and initiation of appropriate therapy, potentially reducing the rate of more severe illness.

#### **6.12.4 Serious Adverse Events and Unanticipated Problems**

A serious adverse event (SAE) is defined as any adverse experience occurring during study participation that results in any of the following outcomes: death, a life-threatening adverse drug experience, inpatient hospitalization or prolongation of existing hospitalization, a persistent or significant disability/incapacity, or a congenital anomaly/birth defect. Important medical events that may not result in death, be life-threatening, or require hospitalization may be considered a serious adverse drug experience when, based upon appropriate medical judgment, they may jeopardize the patient or volunteer and may require medical or surgical intervention to prevent one of the outcomes listed in this definition.

An SAE will be defined in this study as any untoward medical occurrence regardless of cause or relationship to study drug that:

- Results in death.
- Is life-threatening. Any adverse experience that places the volunteer, in the view of the investigator, at immediate risk of death from the reaction as it occurred (i.e., it does not include a reaction that, had it occurred in a more serious form, might have caused death).
- Requires in-patient hospitalization or prolongation of existing hospitalization (excluding any hospitalization or inpatient observation period required by the study for the period required to treat malaria and any associated comorbidities).
- Results in persistent or significant disability or incapacity.
- Is a congenital anomaly/birth defect.
- An event that requires urgent medical intervention to prevent permanent impairment or damage.
- Important medical events that do not result in death, are not life-threatening, or do not require hospitalization may be considered serious adverse events when, based upon appropriate medical judgment, they might jeopardize the volunteer and might require medical or surgical intervention to prevent one of the outcomes listed above.



2474 **Unanticipated Problems Involving Risks to Subjects or Others:** Based on  
2475 Federal regulations 45 CFR 46.103(b)(5)(i) and 21 CFR 56.108(b)(1)

2476 DEFINITION: “An unanticipated problem is defined as any incident, experience, or  
2477 outcome that meets all of the following criteria:

- 2478 1. Unexpected (in terms or nature, severity, or frequency) given the approved  
2479 research procedures and the subject population studied;  
2480 2. Related or possibly related to a subject’s participation in research; and  
2481 3. Suggests that the research places subjects or others at greater risk of harm  
2482 (physical, psychological, economic, or social harm) than was previously  
2483 known or recognized.

2484 Examples of unanticipated problems include (but are not exclusive to) exposure to  
2485 HIV or other infectious disease due to an unintentional needle stick, disclosure of  
2486 protected health information, occurrences of breaches of confidentiality,  
2487 destruction of study records, unaccounted for study drug, etc.”

2488 An unexpected or unanticipated event involving risks to volunteers or others is one  
2489 that is not described as a risk with respect to nature, severity, or frequency in the  
2490 protocol and/or informed consent form. An unexpected adverse event is further  
2491 defined as any adverse drug effect, the specificity or severity of which is not  
2492 consistent with that which has been previously reported in the current published  
2493 literature, or described in the study documents.

#### 2494 **6.12.5 Adverse Event Reporting**

2495  
2496 Expected adverse events will be reported on a routine basis to the responsible IRBs by  
2497 the investigator as part of scheduled Continuing Review Reports as stipulated by the  
2498 IRB.

2499 **Serious Adverse Events** should be immediately reported (within 48 hours) to the  
2500 NEHCR, Cambodia National Ethics Committee for Health Research (Tel.: 855 23  
2501 880-345, Fax: 855 23 880-346, E-mail: research03@nchads.org) as well as by  
2502 telephone (301-319-9940), fax (301-319-9961) or email  
2503 (wrairhspb@amedd.army.mil) to the WRAIR IRB, thru the WRAIR HSPB, that meet  
2504 the following criteria as soon as the principal investigator becomes aware of the  
2505 event, and then must be followed-up in writing within 10 working days from  
2506 knowledge of the event:

2507 i. **SERIOUS** (i.e., death, a life-threatening adverse experience, inpatient  
2508 hospitalization or prolongation of existing hospitalization, a persistent  
2509 or significant disability or incapacity, or a congenital anomaly or birth  
2510 defect [21 CFR 312.32(a)]), **and**

2511 ii. **UNANTICIPATED** (An unanticipated event is any adverse experience  
2512 where the nature, severity or frequency is not identified in the  
2513 investigator brochure or described in the protocol. Events which are





2514 already cited in the investigator brochure or protocol are not  
2515 unanticipated and do not have to be reported to the WRAIR IRB,  
2516 except in the continuing review report), **and**

2517 iii. **RELATED** to the study design, procedures, or drug/device (possibly,  
2518 probably or definitely related, or undetermined/unknown). If the  
2519 adverse experience/event is clearly not related to the study drug,  
2520 device, procedures, or washout process, it would not represent a risk  
2521 to other subjects in the research and, therefore, does not have to be  
2522 reported to the WRAIR IRB

2523 **Unanticipated problems involving risks to subjects** or others should be  
2524 promptly report (within 48 hours of the PI becoming aware of the problem ) by  
2525 telephone (301-319-9940), fax (301-319-9961) or email  
2526 (wrairhspb@amedd.army.mil) to the WRAIR IRB, thru the WRAIR HSPB, and  
2527 then must be followed-up in writing within 10 working days from awareness of  
2528 the problem.

2529 All safety reports for events that are both serious and unexpected at a minimum will  
2530 include Volunteer identification number and initials, volunteer's ages, gender and  
2531 ethnicity, test article and dates of administration, signs/symptoms and severity, date  
2532 of onset, date of resolution or death, relationship to the study drug, action taken,  
2533 concomitant medication(s) including dose, route and duration of treatment, and date  
2534 of last dose.

2535  
2536 Research monitors are required to review all unanticipated problems involving risks  
2537 to subjects or others, serious adverse event reports, unanticipated adverse device  
2538 effects, and all subject deaths, and provide an unbiased written report of the event  
2539 promptly to the NEHCR, Cambodia National Ethics Committee for Health Research  
2540 (Tel.: 855 23 880-345, Fax: 855 23 880-346, E-mail: research03@nchads.org), and  
2541 as well as by telephone (301-319-9940), fax (301-319-9961) or email  
2542 (wrairhspb@amedd.army.mil) to the WRAIR IRB, thru the WRAIR HSPB. The  
2543 Research monitor will then submit written reports within 10 working days to the  
2544 WRAIR IRB and to the National Ethical Committee for Health Research, Cambodia.

#### 2545 **6.12.6 Follow-up of Adverse Events**

2546  
2547 All AEs regardless of severity will be followed by study investigators until satisfactory  
2548 resolution. Resolution could include a classification of ongoing if the event is  
2549 stabilized with no further change expected. The investigator will ensure that follow-  
2550 up includes any supplemental investigations as may be indicated to elucidate the  
2551 nature and/or causality of the AE or SAE. This may include additional laboratory  
2552 tests or investigations, histopathological examinations, or consultation with other  
2553 health care professionals.  
2554



2555 Dropout rates and reasons for dropping out will be reported. If a study volunteer  
2556 withdraws from the study or if an investigator decides to discontinue the volunteer  
2557 from the study because of a SAE, effort will be made to ensure the volunteer has  
2558 appropriate medical follow-up. Monitoring will continue where possible and  
2559 appropriate in order to determine whether the problem prompting hospitalization has  
2560 resolved or stabilized with no further change expected, or is discovered to be clearly  
2561 unrelated to study drug, or progresses to death. The Investigator/clinical staff will  
2562 report the follow-up for serious adverse events as noted above.

2563  
2564 After discharge from the study, any treatment-related adverse events classified as  
2565 “probable” or “definite” in relation the study drug, will be followed to resolution where  
2566 possible. All SAEs will be followed until satisfactory resolution or until the Principal  
2567 Investigator (with agreement of the research monitor) deems the event to be chronic  
2568 or the volunteer to be stable.

2569  
2570 A post-study AE/SAE is defined as any event that occurs after the volunteer has  
2571 been discharged from the study. Investigators are not obligated to actively seek AEs  
2572 or SAEs in former study participants. However, if the investigator learns of any SAE,  
2573 including a death, at any time after a volunteer has been discharged from the study,  
2574 and he/she considers the event reasonably related to the study, the investigator will  
2575 promptly notify any IRB.

2576

### 2577 **6.13 Criteria for Discontinuation or Withdrawal of a Subject**

2578

2579 Any volunteer may be discontinued from the study at any time at the discretion of the  
2580 Principal Investigator or designee, research monitor, a consulting clinical physician,  
2581 or a responsible IRB if he/she feels it is in the best interest of the volunteer or if in  
2582 the judgment of the investigator continuing in the study would be harmful and/or  
2583 inappropriate for the volunteer (e.g. volunteers not tolerating the study treatment,  
2584 development of SAEs or if a volunteer cannot be followed thereby not permitting  
2585 adequate safety assessment). Any volunteer who is terminated due to an SAE or  
2586 determined to have an unexpected AE will be reported to the research monitor for  
2587 review. See section 6.13.1 below for pre-specified halting criteria. Any volunteer  
2588 who is discontinued or who withdraws from the study will be asked to come in for  
2589 clinical and laboratory assessments required to ensure volunteers safety and to  
2590 complete discharge procedures.

2591

2592 The NEHCR and the WRAIR IRB will be notified when a volunteer is withdrawn from  
2593 the study as part of the continuing review report, unless withdrawal is the result of an  
2594 SAE.

2595

2596



2597 **6.13.1 Halting Rules Criteria**

2598

2599 Since primaquine administration is a onetime (45 mg) dose only, any volunteer with mild  
2600 to moderate G6PD deficiency who experiences grade 3 hemolysis after this dose of  
2601 primaquine will be monitored closely according to protocol procedures and any treated  
2602 with any necessary interventions by the study investigators and/or the research monitor  
2603 for the volunteer's safety.

2604

2605 If more than 2 subjects with mild to moderate G6PD deficiency are found to have grade  
2606 3 hemolysis following treatment with primaquine for antirelapse therapy, further  
2607 treatment with primaquine will be suspended for all G6PD deficient subjects enrolled in  
2608 the study.

2609

2610 Volunteers observed to have sustained QTcF prolongations greater than 500ms  
2611 (grade 3) on more than one EKG study at least 15 minutes apart where this  
2612 represents a significant increase compared to screening QTcF will be evaluated by  
2613 the Principal Investigator. If it is determined that the QTcF prolongation is study-  
2614 drug related, and not due to confounding factors to include fever, tachycardia,  
2615 concomitant ingestion of other QT prolonging medications, or electrolyte  
2616 deficiencies, any remaining DHA-piperaquine treatment will be halted, and the  
2617 patient switched to an alternative drug to complete an adequate course of therapy as  
2618 described under Section 6.14, Rescue Treatment. All such cases, regardless of  
2619 relatedness, will be reported to the DSMB as described under the DSMB Charter,  
2620 including those who may have completed therapy prior to the observation of grade 3  
2621 QT interval prolongation (see Appendix F). All volunteers with grade 3 QT interval  
2622 prolongation will continue safety follow-up for the duration of the study.

2623

2624 **6.14 Rescue Treatment for Malaria Infection**

2625

2626 The requirement for rescue treatment will be based on investigator clinical judgment.  
2627 However, failure to respond adequately to DP will include the following: development  
2628 of danger signs (e.g. impaired consciousness, convulsions, respiratory distress) or  
2629 severe malaria in the presence of parasitemia; and parasitemia on Day 2 higher than  
2630 Day 1. The presence of both asexual parasitemia and fever (tympanic temperature  
2631 > 38°C) on Day 3 is not necessarily an indication for rescue treatment as long as  
2632 parasite counts continue to trend downward, and the volunteer is without danger  
2633 signs as outlined in the National Guidelines. Per protocol, volunteers will remain  
2634 under direct observation until both parasitemia and fever have cleared.

2635

2636 Recent AFRIMS clinical studies in this region have demonstrated that the majority of  
2637 malaria volunteers with both fever and parasitemia at 72 hours who continue their  
2638 antimalarial treatment will go on to clear parasites and fever and remain free from  
2639 recurrence up to 42 days (Noedl, 2010; and Bethell, 2011), and it is important to  
2640 capture this outcome. Treatment of volunteers who fail the primary treatment



2641 regimen with worsening symptoms, fever, and/or parasitemia after day 4 will be  
2642 given malaria rescue therapy in accordance with current National Treatment  
2643 Guidelines. Volunteers who develop worsening or unexplained symptoms not  
2644 otherwise attributable to malaria at any time will be evaluated for alternative  
2645 diagnoses.

2646  
2647 Subjects with signs of severe malaria will be excluded and referred for immediate  
2648 treatment. Stable subjects with high parasitemias up to 200,000 may be treated  
2649 under this protocol as with similar approved protocols in the past including WR 1396  
2650 (ARC2) and WR 1737 (Prophylaxis Pilot Study). Patients presenting for treatment  
2651 with parasitemias between 1,000-200,000 who are clinically stable and can take oral  
2652 medications will not be excluded.

### 2653 **6.15 Criteria for Study Termination**

2654  
2655 See section 6.13 above for individual participation and/or study drug halting and  
2656 termination. If more than 3 volunteers are determined to have sustained grade 3  
2657 QTcF interval prolongation attributable to study drug by the DSMB, the DSMB may  
2658 recommend that the study be halted. The Investigators may terminate the study at  
2659 any time if it is determined that continuing the study would pose an undue risk to the  
2660 safety of volunteers.

2661  
2662 If more than 2 subjects with mild to moderate G6PD deficiency are found to have  
2663 grade 3 hemolysis following treatment with primaquine for antirelapse therapy,  
2664 further treatment with primaquine will be suspended for all G6PD deficient subjects  
2665 enrolled in the study. However, the overall study will not be halted, and study visits  
2666 for all volunteers other than primaquine dosing for those with G6PD-deficiency will  
2667 continue for all volunteers as scheduled.

2668

### 2669 **6.16 Quality Control and Quality Assurance**

2670  
2671 AFRIMS maintains approved SOPs/SSPs that govern QC/QA procedures that will be  
2672 followed during the course of this study.



2673

## 2674 **7 STATISTICAL METHODS**

### 2675 **7.1 Statistical Procedures**

2676

2677 Because this is a surveillance study, data will be analyzed on a continuous basis  
2678 with generation of an annual report to the National Malaria Control Program of  
2679 results. This study aims to monitor efficacy of a 3-day fixed-dose course of DHA-  
2680 piperaquine for uncomplicated *P. falciparum* malaria over a three year period along  
2681 the Thai-Cambodia border. Any loss of efficacy, clinical or parasitologic, or increase  
2682 in molecular determinants of drug resistance, will be crucial for updating or adjusting  
2683 national malaria treatment guidelines by the CNM. A sub-analysis for overall 42-day  
2684 efficacy of DP as compared to DP/PQ will also be performed. The potential reduction  
2685 in gametocytes by a onetime dose of primaquine is exploratory in nature and  
2686 statistics will be descriptive in nature. See Section 8 for detailed data analysis  
2687 procedures.

2688

2689 Volunteers developing malaria will randomized to either 45mg single dose  
2690 primaquine or no primaquine treatment on day 3. Effects on the sexual stage  
2691 gametocytes will be explored using a combination of light microscopy, PCR  
2692 genotyping to distinguish early and late stage gametocytes, and a mosquito  
2693 membrane feeding assay to determine malaria oocyst prevalence in the mosquito.  
2694 There are no statistical assumptions or power calculations for this analysis as it  
2695 remains exploratory – little data is available on which to develop assumptions.

2696

#### 2697 **7.1.1 Sample Size Estimation**

2698

2699 The statistical analysis of 42-day efficacy of the 3-day course of DP will be based around  
2700 a 1-sample proportion (proportion that fail treatment). The primary end-point for  
2701 sample size purposes will be 42 day efficacy of DP for uncomplicated *P. falciparum*.  
2702 Each year, approximately 50 subjects will be enrolled over the 3 year period (total n  
2703 estimated at 150 evaluable subjects). If the point estimate for 42 day efficacy is  
2704 94%, the 95% confidence interval for the annual estimate of true efficacy will be  
2705 approximately 89-97% (n = 150).

2706

2707 Approximately 150 evaluable volunteers, 50 during each year of the study, will be  
2708 enrolled. This is felt to be an appropriate target enrollment based on early  
2709 epidemiologic data gathered from existing passively collected government sources,  
2710 and small active case detection exercises conducted during site assessment  
2711 activities indicate that the malaria attack rate will average 5-10% per month.  
2712 Estimates of treatment cure rates and 95% CIs (exact) will be reported on at least an  
2713 annual basis until the surveillance activity ceases or changes substantially (eg, a



2714 new first-line ACT is introduced, and there is no longer an interest by Cambodian  
2715 authorities in monitoring DHA-piperaquine efficacy).  
2716

### 2717 **7.1.2 Randomization and Stratification**

2718  
2719 All volunteers enrolling with *P. falciparum* or mixed infection malaria will receive 3  
2720 days of DP therapy but then will be randomized into the two open label treatment  
2721 arms using block randomization with a block size of two. Data may be stratified  
2722 post-hoc based on demographic and/or other variables, but stratification is not part  
2723 of the primary analysis.  
2724

### 2725 **7.1.3 Populations for Analysis**

2726  
2727 All volunteers with a diagnosis of uncomplicated malaria who receive at least one  
2728 dose of test article during the Treatment Study will be included in the efficacy  
2729 database for Primary Endpoint analysis (Intention to Treat). The per protocol  
2730 analysis population will include all those volunteers who completed the full  
2731 prescribed treatment course of DHA-piperaquine as well as 42 day follow-up.  
2732 However, volunteers lost to follow-up that do not complete 42 days worth of  
2733 assessments will be excluded from the per protocol efficacy analysis, but included in  
2734 a modified intention to treat analysis. All volunteers with at least one follow-up  
2735 assessment will be included in the safety analysis, pharmacokinetic analysis, and  
2736 MSP-1 antibody titer analysis. All parasitologic data will be included in the  
2737 parasitologic analysis. The safety analysis database will include those volunteers in  
2738 the set of randomized volunteers who receive at least one dose of study drug.  
2739

### 2740 **7.1.4 Deviations from the Statistical Plan**

2741  
2742 Major deviations from the statistical plan such as changes in treatment regimens or  
2743 number of enrollees along with the reasons for the deviations, will be described in  
2744 protocol amendments, the complete statistical plan, the clinical study report, and/or  
2745 any combination of these, as appropriate.



2746 **8 DATA ANALYSIS**

2747 **8.1 General Considerations – Data Analysis**

2748

2749 Planned data analyses are as follows.

2750 (1) Assess/test the efficacy (recurrence rates at 42 days) of a 3-day course of DP  
2751 as compared to DP followed by one time dose of PQ

2752

2753 (2) Determine the effect of onetime dose of primaquine on presence of  
2754 gametocytemia and transmissibility of infection to Anopheles mosquitoes

2755

2756 Primary endpoint treatment efficacy is defined as PCR-corrected parasitological cure  
2757 of malaria at 42 days after starting therapy. Efficacy against all blood stage malaria  
2758 infection will also be classified according to WHO malaria treatment outcome  
2759 classifications adapted for the purposes of clinical research (WHO 2009) as a  
2760 secondary endpoint. Note however that clinical management of these individuals will  
2761 be based on the best clinical judgment of the investigators and informed by current  
2762 National Treatment Guidelines in Cambodia (see Appendix A).

2763 **8.2 Efficacy Study Analysis**

2764

| Treatment Outcome                                                                      | Symptoms and Signs                                                                                                                                                                                                                                                                                                                                                                                                                                                                                                                                                                                          |
|----------------------------------------------------------------------------------------|-------------------------------------------------------------------------------------------------------------------------------------------------------------------------------------------------------------------------------------------------------------------------------------------------------------------------------------------------------------------------------------------------------------------------------------------------------------------------------------------------------------------------------------------------------------------------------------------------------------|
| Early treatment failure                                                                | <ul style="list-style-type: none"> <li>- Development of danger signs or severe malaria on days 1-3 in the presence of parasitemia.</li> <li>- Parasitemia on day 2 higher than the day 0 count irrespective of temperature.</li> <li>- Parasitemia on day 3 with tympanic temperature <math>\geq 38.0^{\circ}\text{C}</math>.</li> <li>- Parasitemia on day 3 that is <math>\geq 25\%</math> of the count on day 1.</li> </ul>                                                                                                                                                                              |
| Late treatment failure:<br>- Late clinical failure<br><br>Late parasitological failure | <ul style="list-style-type: none"> <li>- Development of danger signs or severe malaria after day 3 in the presence of parasitemia, without previously meeting any of the criteria of ETF.</li> <li>- Presence of parasitemia and tympanic temperature <math>\geq 38.0^{\circ}\text{C}</math> (or history of fever) on any day from days 4-42, without previously meeting any of the criteria of ETF.</li> <li>- Presence of parasitemia on any day from days 7-42 and tympanic temperature <math>&lt; 38.0^{\circ}\text{C}</math>, without previously meeting any of the criteria of ETF or LCF.</li> </ul> |
| Adequate clinical and parasitological response                                         | <ul style="list-style-type: none"> <li>- Absence of parasitemia on day 42 irrespective of tympanic temperature without previously meeting any of the criteria of ETF, LCF or LPF.</li> </ul>                                                                                                                                                                                                                                                                                                                                                                                                                |

2765



2766 Efficacy at Day 42 will be based on microscopy of thick/thin blood films by expert  
2767 microscopists blinded as to treatment allocation and clinical data of each volunteer  
2768 following AFRIMS SOP. The primary endpoint (cure) for the treatment portion of the  
2769 study is defined as non-recurrence of malaria (within 42 days) following treatment as  
2770 detected by PCR-corrected microscopy. Cure rates (exact 95% CIs) will be  
2771 calculated. Fisher's exact test (two-sided) will be used to test the null hypothesis of  
2772 no difference in cure (fail) rates. A p-value < 0.05 (two-sided) will be considered  
2773 statistically significant. As supporting analysis, a log-rank test will be performed to  
2774 compare time to treatment failure in the two treatment regimens. The efficacy  
2775 analyses will be done for the intent to treat and per protocol population.  
2776

2777 Demographic, epidemiological, and laboratory data will be summarized at baseline  
2778 and for any data collected at follow-up. Appropriate univariate statistics will be  
2779 calculated to summarize and compare the range, location (means, medians, etc),  
2780 and variability of numerical data. Geometric means will be calculated for antibody  
2781 titer data, and all non-normally distributed data. Graphical summaries (e.g. box plots,  
2782 histograms) will be used to describe and compare distributions of numeric variables.  
2783 Frequency tables will be used to summarize distributions for discrete data.  
2784 Confidence limits (95%) for means, geometric means and proportions will be  
2785 calculated.  
2786

2787 All clinical and laboratory data related to secondary endpoints (Section 5.2) will be  
2788 summarized and compared in the two regimens. T-tests and chi-square tests will be  
2789 used to assess the statistical significance of differences in two means (possibly log-  
2790 transformed) or proportions. Confidence limits (95%) for means, geometric means  
2791 and proportions will be calculated. Time to event data (e.g. fever and parasite  
2792 clearance time) will be summarized using Kaplan-Meier plots. The log-rank test will  
2793 be used to assess the statistical significance of difference between treatment  
2794 groups. The time required to achieve a reduction in parasite density of 50%, 90%,  
2795 and to undetectable levels will be analyzed using Cox proportional hazard modeling.  
2796 Curve fitting will be used to interpolate results for calculation of parasite clearance  
2797 and parasite density reductions  
2798

### 2799 **8.3 Pharmacokinetic Analysis**

2800  
2801 Drug levels (piperaquine) at each of the time points will be expressed as means and  
2802 95% confidence intervals if the data are normally distributed, and compared using  
2803 parametric tests. If not normally distributed they will be expressed as medians and  
2804 the range and interquartile range given. Comparison will be by non-parametric tests.  
2805 Standard pharmacokinetic parameters including  $C_{max}$ ,  $T_{max}$ ,  $T_{1/2}$  and AUC will be  
2806 calculated using WinNonLin and/or other appropriate microcomputer software  
2807 packages. Exploratory analyses will be undertaken to describe the relationship  
2808 between plasma concentration and the effect of DP treatment on pharmacodynamic  
2809 variables over time. If the data allow, an attempt will be made to characterize the  
2810 relationship using modeling.





2811 **8.4 Parasite drug resistance in vitro**

2812  
2813  
2814  
2815  
2816  
2817  
2818  
2819  
2820  
2821  
2822

For in vitro data from patients with *P. falciparum* infections, inhibitory concentrations at 50% (IC50) and 90% (IC90), the principal measures of drug sensitivity, will be estimated by non-linear regression analysis of the raw data obtained from the ELISA plate reader or the liquid scintillation counter (Noedl 2002). ICs and other continuous variables will be summarized using geometric means with 95% confidence intervals. Comparison of activity will be done by comparing individual ICs by Mann Whitney U-test analysis. Comparison of results obtained using different methods will be done by correlation analysis and Bland-Altman plots (Bland and Altman 1995).

2823 **8.5 Molecular Markers of Parasite Resistance**

2824  
2825  
2826  
2827  
2828  
2829  
2830  
2831  
2832  
2833  
2834  
2835  
2836  
2837  
2838  
2839  
2840  
2841  
2842  
2843  
2844  
2845  
2846  
2847  
2848  
2849  
2850  
2851  
2852  
2853  
2854

For studying genetic markers of resistance and population genetics of malaria in Cambodia, parasite DNA extracted from human white blood cell-depleted blood samples and filter paper blood spots will be subjected to genotyping using various platforms including but not limited to direct DNA sequencing, next-generation DNA sequencing, real-time PCR, other molecular biology tools and DNA and RNA chip technologies, to identify specific parasite variants or genetic loci associated with resistance. Parasite DNA will also be extracted from the mosquitoes used in the membrane feeding assay and will be subjected to similar genetic and molecular testing. RNA stabilized on blood spots will be used to assess stage-specific asexual and sexual parasite gene expression.

The exact methods of testing and assays used may vary from what is outlined here as technologies in genetics and genomics are rapidly advancing. Two primary analyses will be performed as part of this study; however, additional studies of parasite drug resistance and population genetics may be conducted using these samples and the techniques outlined above. The two primary analyses will include: 1) studying the transmissibility of drug resistant parasites from humans to mosquitoes and 2) evaluating for within-host selection of drug resistance.

1) Transmissibility of genetic variants will be assessed from all volunteers regardless of PQ or placebo receipt. Using Massively Parallel Pyrosequencing (MPP) the complete distribution of parasite variants (including their frequency) in samples can be determined. Thus the progress of specific variants through the transmission cycle to the mosquito can be followed to determine if any selection or genetic bottleneaking occurs. For each volunteer, parasite DNA extracted from blood samples, mosquito midguts and mosquito salivary glands collected at specified time points will be PCR-amplified using primers specific for the central variable region of merozoite surface protein 2 (*m*sp2) and the drug resistance gene pfmdr1. As the starting material from the midguts and salivary glands will be limited, whole genome amplification (WGA) will be conducted prior to amplicon preparation. Fidelity of genome amplification will be verified using analysis of 20 microsatellite markers on



2855 the original genomic and amplified DNA. Depending on the yield of WGA, only  
2856 amplicons from individual mosquitoes with high oocyst loads may be able to be  
2857 generated. Initially, individual mosquitoes will be sampled, and the number of  
2858 variants within each mosquito will be compared to the mosquito lot for each  
2859 volunteer. After this type of sampling is done on a few prototype patients, all  
2860 mosquitoes fed on each patient will likely be combined and the whole lot analyzed  
2861 for better yield and cost-saving/efficient purposes. The amplicon libraries will be  
2862 sequenced using the 454 sequencer at the Microbiome Core Facility located at the  
2863 University of North Carolina (UNC). A goal of 2,000 reads per sample will allow  
2864 detection of variants as low as 2.5% of the parasite population with high precision.  
2865 Data analysis will be done using a new bioinformatic pipeline for haplotype building  
2866 developed at UNC. Changes in parasite diversity may also be evaluated using  
2867 microsatellite mapping, linkage disequilibrium calculation, phylogenetic  
2868 characterization, and other molecular analyses as developed on isolated parasites  
2869 from both human and mosquito.

2870  
2871 2) Within-host selection for drug resistance will be evaluated using similar  
2872 techniques as described above (MPP) to track genetic variants longitudinally during  
2873 the course of treatment. An increase in the relative frequency of one variant  
2874 compared to a second after one replicative cycle would suggest that the one over-  
2875 represented was more fit in the presence of drug and therefore may be more drug  
2876 tolerant. Additional analysis of these tolerant phenotype parasites by genomics tools  
2877 (e.g. NGS, DNA and RNA chips) may help identify novel loci in the genome  
2878 associated with drug resistance. In order to do this, selection coefficients for variants  
2879 up-selected by DHA and/or piperazine based on in vitro resistance profiles will be  
2880 defined. Using data on parasite density and change in parasite frequency, selection  
2881 coefficients will be determined. This will be the first time these will be determined in  
2882 vivo. We will also model the in-host dynamics of selection of DHA resistant  
2883 parasites in vitro using culture adapted parasites.

2884  
2885 These samples may be used in the future to address other issues related to drug  
2886 resistance and parasite genetic structure in Cambodia. For example, microsatellite  
2887 analysis could help determine the genetic origin of any novel resistance loci (or  
2888 known resistance loci) identified in the parasites during the trial. In this case, the  
2889 heterozygosity and variance in allele size could be calculated, as well as the number  
2890 and frequency of alleles at each microsatellite locus.  $H_e$  and  $F_{st}$  would be calculated  
2891 between all pairs of clusters as previously described (Vinayak, 2010). Finally,  
2892 genetic analysis may also be conducted at AFRIMS (Immunology) and/or WRAIR  
2893 (Malaria Research Program) including, but not limited to, assessment of gene copy  
2894 numbers of *pfcr* (chloroquine resistance), *pfdhfr* (folate resistance), *pfmdr1* (multi-  
2895 drug resistance), and *pfcytb1* (atovaquone resistance), and other markers as  
2896 appropriate.

2897  
2898  
2899



2900 **8.6 Safety Analysis**

2901

2902 The overall safety and tolerability of DHA-piperazine treatments will be assessed  
2903 throughout the study by evaluating adverse events and the following additional  
2904 safety variables:

2905

- 2906 • Clinical laboratory tests (liver function, renal function, and hematology)
- 2907 • Vital signs
- 2908 • Physical exam findings
- 2909 • Cardiac safety as determined by electrocardiogram (EKG)

2910

2911 For continuous variables, descriptive statistics (n, mean, standard deviation, median,  
2912 minimum and maximum) will be provided. For categorical variables, volunteer count  
2913 and percentage will be provided. Descriptive summaries of serious adverse events,  
2914 volunteer discontinuations due to adverse events, and potentially clinically significant  
2915 abnormal values (clinical laboratory or vital signs) will also be provided. EKG  
2916 findings will be analyzed, including corrected QTc intervals using Bazett's and  
2917 Fridericia's formulae. Adverse events will be attributed to the treatment regimen  
2918 corresponding to the last dose administered.

2919

2920 Adverse events (AE) will be expressed as percentages and compared with chi-  
2921 square tests. AE rates are expected to be small and the study is not powered to  
2922 detect differences in AE rates. Because of the large number of statistical tests, p-  
2923 values will not be used to assess "statistical significance", but to flag differences in  
2924 AE rates. Differences in AE rates will be flagged if  $p < 0.05$  and identified as possibly  
2925 clinically important if  $p < 0.01$ . Correlations between clinical and laboratory  
2926 parameters will be explored and represented graphically. Other exploratory analyses  
2927 may be carried out.

2928

2929 **8.7 Interim Analysis**

2930

2931 Results will be analyzed on a continuous basis.

2932



2933

2934

## 9 ETHICAL CONSIDERATIONS

2935

2936

The investigator will ensure that this study is conducted in full conformity with the International Conference for Harmonization Good Clinical Practice (ICH-GCP) regulations and guidelines, whichever affords the greater protection to the volunteer.

2937

2938

2939

2940

### 9.1 Informed Consent

2941

2942

*Freely given informed consent will be obtained from every volunteer prior to study participation. Informed consent will take place before any study specific procedure, prior to the initiation of non-routine study-related tests, and prior to administration of study drug. Signed and dated, informed consent will be obtained from each volunteer in accordance with GCP and with local regulatory and legal requirements. The completed informed consent form must be retained by the investigator as part of the study records and a copy will be provided to study volunteers. The investigators, or a person designated by the investigators, will fully inform the volunteer of all pertinent aspects of the study including the written information giving approval by the IRB/IEC. Neither the investigator, nor the trial staff, will coerce or unduly influence a volunteer to participate or to continue to participate in the study.*

2943

2944

2945

2946

2947

2948

2949

2950

2951

2952

2953

2954

In obtaining and documenting informed consent, the investigators will comply with the applicable regulatory requirement(s), and will adhere to GCP. Prior to the beginning of the study, the investigators will have the IRB/IEC's written approval/favorable opinion of the written informed consent form and any other written information to be provided to volunteers.

2955

2956

2957

2958

2959

2960

The written informed consent form and any other written information to be provided to volunteers will be revised whenever important new information becomes available that may be relevant to the volunteer's consent. Any revised written informed consent form, and written information will receive the IRB/IEC's approval/favorable opinion in advance of use. The volunteer will be informed in a timely manner if new information becomes available that may be relevant to the volunteer's willingness to continue participation in the study. The communication of this information will be documented. This may be accomplished by repeating the consent process with the revised consent form with attention given to the changes, or it may be done using an addendum consent that states the revision or new information. The new document will be signed, placed in the study record, and a copy given to the volunteer. New volunteers enrolled in the study will be consented with the most recent approved consent form.

2961

2962

2963

2964

2965

2966

2967

2968

2969

2970

2971

2972

2973

2974

### 9.2 Volunteer Identification and Confidentiality

2975

2976

All personal study volunteer data collected and processed for the purposes of this study will be managed by the investigators and his/her staff with adequate

2977



2978 precautions to ensure the confidentiality of those data, and in accordance with  
2979 applicable national and/or local laws and regulations on personal data protection.  
2980 Volunteers will not be identified in any presentation of the results.

2981  
2982 This study will not involve the collection of data on sensitive matters such as sexual  
2983 behavior or criminal activities. No HIV or human genetic testing will be performed on  
2984 any samples collected during this study other than to assess G6PD genotypes and  
2985 hemoglobin typing. This protocol does not involve audio or videotaping of research  
2986 volunteers. All volunteer records and CRFs will be carefully designed to limit the  
2987 personal information to be acquired to that which is essential. Data that could reveal  
2988 a volunteer's identity will be stored in files accessible only to authorized staff. As  
2989 early as feasible, the data will be coded to remove identifying information.

2990

### 2991 **9.3 Data Management**

2992 The database generated by this study will contain information collected through  
2993 CRFs and laboratory data. It will be created in collaboration with the AFRIMS  
2994 Department of Epidemiology and Surveillance (EDS). Clinical and laboratory data  
2995 pertaining to drug efficacy will be managed by AFRIMS Immunology and Medicine  
2996 using guidelines and data management tools developed by the World Wide  
2997 Antimalarial Research Network (WWARN). WWARN was constructed based on the  
2998 need for a comprehensive, global surveillance system "to identify new foci of  
2999 [artemisinin] resistance, develop tools to track its spread and provide to the malaria  
3000 community the information needed to contain resistance....WWARN has built a  
3001 secure web-based platform that allows researchers to share data on the drug  
3002 responses of individual patients or parasites, which are transformed into comparable  
3003 standard formats" ([www.wwarn.org](http://www.wwarn.org)). See Appendix D for the WWARN database  
3004 recommendations and analyses. WWARN also uses the WHO Guidelines for drug  
3005 efficacy analysis listed in Section 8.1. Data management (source, CRFs etc) for  
3006 elements information not collected according to WWARN guidelines will be  
3007 developed by AFRIMS Immunology and Medicine. Parasitological data will also be  
3008 contributed to a central database at WRAIR and shared with partner labs. No  
3009 individually identifiable information will be included in the database, and the  
3010 database will be password protected to limit access to the data.

3011

3012 The database will be created and managed at AFRIMS by EDS and stored on a  
3013 limited access server. To ensure consistency across antimalarial drug efficacy  
3014 studies, WWARN has listed common variables to be captured for all studies. Such  
3015 data should include: unique identifier code (UIC), pertinent demographic data,  
3016 treatment group assignment, parasitologic data such as but not limited to  
3017 parasitemia, gametocytemia, speciation etc, volunteer clinical data and safety  
3018 laboratory test results. Additional data collected for study completeness will also be  
3019 included in this database (i.e., past medical history, vital signs etc).

3020



3021 Volunteer names will also be added to the Volunteer Registry Database as required  
3022 by the US Army Medical Research and Materiel Command (USAMRMC) whenever  
3023 human volunteers are used in research studies. This database is maintained only for  
3024 volunteer safety and will be kept in a secure location at USAMRMC in Fort Detrick,  
3025 MD. The purpose of the database is to allow the investigators and/or MRMC  
3026 regulatory officials to contact volunteers who have participated in US Army  
3027 biomedical research studies in the event that new information becomes available  
3028 that could potentially affect volunteer health and/or safety. It is the policy of  
3029 USAMRMC that data sheets are to be completed on all volunteers participating in  
3030 research for entry into the U.S. Army Medical Research and Materiel Command  
3031 Volunteer Registry Database. The information to be entered into this confidential  
3032 database includes name, address, adverse events which may occur during study  
3033 participation, study name, and dates. The intent of the database is twofold: first, to  
3034 readily answer questions concerning an individual's participation in research  
3035 sponsored by the USAMRMC; and second, to ensure that the USAMRMC can  
3036 exercise its obligation to ensure research volunteers are adequately warned (duty to  
3037 warn) of risks and to provide new information as it becomes available. The  
3038 information will be stored at the USAMRMC for a minimum of 75 years. The only  
3039 other documents to include individually identifiable information will be the  
3040 identification log, a source document that will remain securely stored with other  
3041 source documents at CNM. No individually identifiable volunteer information will  
3042 otherwise be transported, transmitted or otherwise removed from Cambodia with the  
3043 exception of information required for the VRD which will be stored at USAMRMC HQ  
3044 as outlined above.

#### 3046 **9.4 Risk to Volunteers and Precautions to Minimize Risk**

3047  
3048 The main risks to individual volunteers as a result of study participation beyond  
3049 those related to the clinical diagnosis and treatment of malaria include:

- 3051 • Adverse effects from treatment with antimalarials. DHA-piperazine has been  
3052 adopted as the first line antimalarial agent by the National Malaria Control  
3053 Program in Cambodian (CNM). The study is designed in part to evaluate the  
3054 safety and tolerability of a standard 3-day regimen of DHA-piperazine  
3055 Piperazine can cause prolonged QT interval; however, other large regulated  
3056 clinical trials submitted to the European Medicines Agency (see Section 3.3)  
3057 showed that DP at the doses used in this study did not cause a clinically  
3058 significant prolongation of the QT interval. In AFRIMS trial WR 1849, it was  
3059 found that a 2 day compressed course of therapy caused significant QTcF  
3060 prolongation, and the study was halted with recommendations to use the  
3061 standard 3 day course, and to avoid giving piperazine to patients within 3 hours  
3062 of a meal (see Section 3.3). In this study, EKG monitoring will take place with  
3063 oversight from a Cardiac Data Safety Monitoring Board (see Appendix F, DSMB  
3064 Charter). Protocol safety criteria have been modified in accordance with those  
3065 used in protocol WR 1737 (AFRIMS Malaria Cohort and Treatment Study,  
3066 conducted 2010-2011) to account for and control the potential confounding



3067 effects of malaria on the electrocardiogram due to fever and tachycardia. The  
3068 other potential antimalarials used in this study will all be prescribed in accordance  
3069 with the study protocol and current national treatment guidelines. In general,  
3070 potential medications used to treat malaria are well tolerated. Volunteers will be  
3071 followed by a trained team of clinical malaria researchers with particular attention  
3072 to potential side effects, and study treatment will be directly observed.  
3073 Volunteers in this study will be followed up more closely and for longer duration  
3074 by a dedicated study team, and will have an enhanced level of care compared to  
3075 malaria volunteers receiving standard of care in Cambodia (non-DOT and more  
3076 limited follow-up visits).

3077  
3078 • Phlebotomy can cause discomfort and pain at venipuncture sites. Volunteers will  
3079 be counseled to return to the clinic if local infection is suspected. The total  
3080 volume of blood drawn in this study for volunteers will be up to approximately  
3081 ~111 ml over 42 days. The maximum draw on any day will be on Days 0 of  
3082 treatment when ~36 ml will be drawn. Subjects treated for recurrences of malaria,  
3083 or treated for severe malaria will have additional blood drawn for study-mandated  
3084 laboratory procedures and for appropriate clinical management if warranted.  
3085 Volunteers with G6PD deficiency who are referred for primaquine therapy will  
3086 have an additional ~12-16 mL drawn during treatment with primaquine therapy to  
3087 monitor for potential hemolysis.

3088  
3089 Risks associated with confidentiality: There is also the risk of a breach in  
3090 confidentiality; however precautions will be taken to minimize this risk. All study  
3091 communications, lab samples, and documents will be identified by a study code.  
3092 These documents will not contain any study subject names or identifiable  
3093 information. The volunteers who agree to be screened will be first assigned a  
3094 unique screening code. If the volunteer is found to be eligible, they will be assigned  
3095 a unique subject identification code upon enrollment. The lab samples sent to  
3096 reference labs as described will contain only subject code. Study information and  
3097 records will be maintained in a secure storage facility in Phnom Penh, Cambodia.

3098  
3099 Although there is little or no risk in G6PD-normal patients, primaquine has the  
3100 potential to induce hemolytic anemia in G6PD-deficient patients, particularly when  
3101 given as a anti-relapse course (14 days). Both qualitative and quantitative testing for  
3102 G6PD deficiency using FDA-approved test kits will be performed on all subjects to  
3103 reduce the chances of misdiagnosis. Quantitative testing will be performed, and  
3104 results will be calculated based on same-day hemoglobin values from the complete  
3105 blood count. Severe deficiency (WHO Class I or II) will be defined as 10% or less of  
3106 the lower limit of normal activity (in G6PD activity units per gram of hemoglobin)  
3107 established for the quantitative assay system. Subjects with severe deficiency will  
3108 not be enrolled. Subjects with mild to moderate (Class III, IV or V) deficiency will be  
3109 enrolled and may be randomized to receive the onetime dose of primaquine. While  
3110 only a single dose of 45mg primaquine will be administered to volunteers for this  
3111 study, careful monitoring of blood counts will occur. A CBC will be obtained at  
3112 enrollment with repeat CBC on day 3 following the primaquine dose. Additional CBC



3113 monitoring will be performed if the hematocrit drops more than 10% post-dose with  
3114 repeat CBCs on day 7 and day 14 after enrollment. The experience from the  
3115 previous study (WRAIR 1737) conducted in Cambodia by AFRIMS in collaboration  
3116 with RCAF demonstrated that there were no severe adverse events due to G6PD  
3117 deficiency seen in any volunteer who received 45mg of primaquine for 8 weeks. As  
3118 described in Section 3.5, only 2 volunteers had drops in the hematocrit of greater  
3119 than 10% which resolved without incident.

3120  
3121 Risks associated with pregnancy: Both malaria and artemisinin antimalarials given  
3122 during the first trimester can have deleterious effects on the developing fetus;  
3123 therefore, pregnant women are excluded from the study. Female volunteers will  
3124 have urinary pregnancy tests performed at screening, at any time of recrudescence  
3125 and at the last follow-up visit (day 42 or alternate day determined by the investigator  
3126 if participation is extended for receipt of antimalarials).

3127  
3128

## 3129 **9.5 Alternatives to Test Article (or Research Treatment)**

3130

3131 Volunteers may elect not to participate in the study, and receive standard medical  
3132 care for malaria which currently includes 2-3 days of non-DOT therapy with an  
3133 artemisinin-piperaquine or an artesunate-mefloquine combination.

3134

## 3135 **9.6 Benefits to Volunteers**

3136

3137 Volunteers will benefit from the increased vigilance provided by the study team and  
3138 will also benefit from directly observed malaria treatment and careful follow-up by a  
3139 trained study team. There are no other direct benefits to volunteers from  
3140 participating in this study. The study will benefit the community as a whole by  
3141 providing up-to-date information on drug resistance and treatment regimen efficacy  
3142 which will be provided to Cambodia National Malaria Control Program (CNM).

3143

## 3144 **9.7 Risks to Study Personnel and Precautions to Minimize Risk**

3145

3146 There are no additional anticipated risks to study personnel as a result of study  
3147 participation. AFRIMS SOPs on occupational health and safety will be adhered to at  
3148 all times, and all staff certified at the appropriate level. Universal precautions will be  
3149 observed at all times when handling biological specimens.

3150

## 3151 **9.8 Risks to the Environment**

3152

3153 None.

3154

3155

3156





3157 **9.9 Financial Incentives to Volunteers**

3158

3159 Compensation will be provided throughout the study, and volunteers will be  
3160 compensated for all study visits completed if they leave the study prior to completion.  
3161 The estimated compensation for completion of the trial will be approximately 20,000  
3162 Cambodian Riel (approximately US \$5 depending on current exchange rates) per  
3163 follow up visit including screening and enrollment, and unscheduled visits.  
3164 Volunteers will also receive this same amount of compensation on a daily basis  
3165 while hospitalized. This compensation takes into consideration lost earnings (for  
3166 civilian dependent beneficiaries), meals and incidentals arising from participation,  
3167 and discomfort from phlebotomy. Compensation provided in the study will be  
3168 outlined in the Informed Consent Document which will be the definitive document  
3169 detailing volunteer compensation throughout the study. Any future changes in  
3170 compensation made to IRB-approved Informed Consent Document will supersede  
3171 the details provided in this section.

3172

3173 **9.10 Medical Care for Injury or Illness**

3174

3175 In accordance with DoDI 3216.02, appropriate language has been included within the  
3176 informed consent addressing Research Related Injury. Medical care in case of  
3177 research-related injury on either an emergency or routine basis will be provided free  
3178 of charge according to local standard of care by qualified medical personnel at the  
3179 appropriate facility. Volunteers will not receive additional compensation for injury  
3180 beyond medical care. Volunteers will be encouraged to discuss this issue with the  
3181 principal investigator before they enroll in this study. This medical care provision  
3182 does not constitute a waiver or release of volunteer's legal rights. Adequate  
3183 provision for RRI will be included as part of the contractual agreement with the  
3184 National Center for Parasitology, Entomology and Malaria Control.

3185

3186

3187



3188 **10 ADMINISTRATIVE PROCEDURES**

3189  
3190 **10.1 Institutional Review Board**

3191  
3192 The protocol and informed consent documents will be provided for the review and  
3193 approval to all IRBs having jurisdiction over the study prior to implementation. The  
3194 protocol will require scientific review and approval by the committee at AFRIMS.  
3195 The protocol will be sent to the University of North Carolina IRB for non-human  
3196 subjects research determination. The protocol will undergo ethical review and  
3197 require approval by the U.S. Army Medical Research and Materiel Command Office  
3198 of Research Protection Human Research Protection Office (USAMRMC ORP  
3199 HRPO), WRAIR IRB, the National Ethics Committee for Health Research IRB# 1  
3200 (NECHR) (FWA# 00010451, IRB # 00003143). All amendments to IRB approved  
3201 documents must be submitted for review and approval by all applicable institutional  
3202 review boards prior to implementation. The WRAIR HSPB will report protocol  
3203 actions to the USAMRMC ORP HRPO as per their current SOP (i.e. UWZC-636 or  
3204 equivalent), as appropriate.

3205  
3206 **10.2 Protocol Amendments**

3207  
3208 Any change or amendment to the protocol affecting study volunteers, study  
3209 objectives, study design, study procedures, or significant administrative aspects will  
3210 require a formal amendment to the protocol. Such amendment will be submitted to  
3211 the WRAIR IRB and NECHR for review and approval prior to implementation.

3212  
3213 Administrative changes to the protocol are corrections and/or clarifications that have  
3214 no effect on the way the study is to be conducted. Such administrative changes will  
3215 be submitted to the WRAIR IRB and NECHR for review and approval prior to  
3216 implementation.

3217  
3218 The Informed Consent Form and protocol related documents will be revised to reflex  
3219 the changes of the amendment as appropriate, and will also be reviewed and  
3220 approved with the amendment.

3221  
3222 **Continuing Review:**

3223 Continuing review reports will be submitted at intervals designated by the WRAIR  
3224 IRB (or IRB of record) and a final and/or closeout report in accordance with 32 CFR  
3225 219 and Army regulations. The continuing review and final and/or closeout reports  
3226 should be submitted to the NECHR and to the WRAIR IRB, thru the WRAIR HSPB  
3227 (*wrairhspb@amedd.army.mil*).

3228  
3229 If the continuing review is not approved by the NECHR and WRAIR IRB by the  
3230 anniversary date, all protocol activities must stop at that site until such time as the  
3231 approval is obtained. A copy of the approved continuing review report and  
3232 supporting documentation, along with IRB approvals will be submitted to the WRAIR



3233 HSPB for processing before review by the WRAIR IRB as soon as these documents  
3234 become available. Review and approvals by the NECHR, are subject to their policies  
3235 but must be performed at least annually.  
3236

### 3237 **10.3 Study Medication Accountability**

3238  
3239 Test article will be purchased commercially and will be maintained securely in a  
3240 locked cabinet by the study team at all times until administered. The study team will  
3241 maintain a log documenting test article administration.  
3242

### 3243 **10.4 Disposition of Data**

3244  
3245 All data will be retained according to ICH guidelines by the Investigators for 5 years  
3246 at AFRIMS office in Cambodia. The case report forms and a copy of the final report  
3247 will be stored in an access-controlled place in the contracted archives of AFRIMS.  
3248

### 3249 **10.5 Access to Source Data/Documents**

3250  
3251 The investigators, research monitor, and other study personnel assigned from  
3252 National Center for Parasitology, Entomology and Malaria Control (CNM) and their  
3253 respective representatives are authorized access to the study data as part of their  
3254 duties and part of their responsibility to protect human volunteers in research. The  
3255 investigators, research monitor, members of the WRAIR IRB, representatives of the  
3256 U.S. Army Medical Research and Materiel Command (USAMRMC), representatives  
3257 of regulatory agencies, and other government agencies are authorized access to the  
3258 study data as part of their duties and part of their responsibility to protect human  
3259 volunteers in research.  
3260

### 3261 **10.6 Certification of Translation (where applicable)**

3262  
3263 Investigators will provide documentation that the foreign language version of the  
3264 consent form is an accurate translation. Documentation of translation will be  
3265 provided along with the English and foreign language version of the consent forms.  
3266 Translations of study documents must be approved by the appropriate approving  
3267 authority for accuracy and completeness of translation. Use the CMD-QP-003-F1,  
3268 Translation Verification Form or a similar document (e.g. memorandum).  
3269

### 3270 **10.7 Protocol Deviations**

3271  
3272 A significant deviation occurs when there is non-adherence to the IRB approved  
3273 protocol that has the potential to effect the rights and welfare of the research  
3274 participant, to increase the risk to the research participant, to change the  
3275 willingness of the research participant to continue participation, or to compromise  
3276 the integrity of the study data in such a way that the study objectives cannot be  
3277 achieved. Significant deviations must be reported promptly to the WRAIR IRB,



3278 within 48 hours of becoming aware of the event, and recorded in the study  
3279 deviation log.

3280

3281 Significant deviations should be promptly report (within 48 hours of the PI  
3282 becoming aware of the deviation) by telephone (301-319-9940), fax (301-319-  
3283 9961) or email (wrairhspb@amedd.army.mil) to the WRAIR IRB, thru the WRAIR  
3284 HSPB, and then must be followed-up in writing within 10 working days from  
3285 awareness of the deviation.

3286

3287 All other deviations (minor) will be recorded in the study deviation log and  
3288 provided as part of the continuing review report.

3289

## 3290 **10.8 Compliance Inspections**

3291

3292 For reporting pending compliance inspections: Notice of compliance inspections will  
3293 be immediately reported to the WRAIR Division of Human Subjects Protection by  
3294 telephone (301-319-9940), fax (301-319-9961) or email  
3295 (wrairhspb@amedd.army.mil), the local IRB, and the USAMRMC Office of Research  
3296 Protections upon knowledge of a pending compliance inspection by any  
3297 governmental agency concerning clinical investigation or research.

3298

## 3299 **10.9 Publication Policy**

3300

3301 Results of this study will be presented in scientific forums orally and in written  
3302 publications in scientific journals. No identifying information for any of the volunteers  
3303 in the study will be included in any presentation of data or photographs. Publications  
3304 will be submitted as per Command review policy.

3305

## 3306 **10.10 Responsibilities of Study Personnel**

3307

3308 All named personnel are fully qualified to perform the following assigned roles. The  
3309 Principal Investigators will ensure that all assigned personnel maintain required  
3310 trainings, licensures and certifications throughout the study. All duties will be  
3311 performed in accordance with GCP Guidelines.

3312

3313 The Principal Investigators will be responsible for all aspects of the study to include:  
3314 Protocol design to include all related documents (such as the consent form, case  
3315 report form, standard operating procedures, etc); supervision and monitoring of  
3316 research staff; protocol compliance and QA/QC plan execution; timely and accurate  
3317 reporting of AEs (including SAEs) to IRBs and management of the respective  
3318 organizations as outlined in the protocol. PIs will also be responsible for clinical and  
3319 scientific aspects of the study to include volunteer care, data analysis, interpretation  
3320 and manuscript preparation; continuing review and final study reports and  
3321 publication. PIs will liaise with study personnel from the different organizations listed



3322 as well as local authorities. All duties will be performed in accordance with GCP  
3323 Guidelines.

3324

3325 The Associate Clinical Investigators will be responsible for multiple aspects of the  
3326 study to include: Protocol design to include all related documents (such as the  
3327 consent form, case report form, standard operating procedures, etc); supervision  
3328 and monitoring of research staff; protocol compliance and QA/QC plan execution;  
3329 timely and accurate reporting of AEs (including SAEs) to IRBs and management of  
3330 the respective organizations as outlined in the protocol. AIs will also be responsible  
3331 for clinical and scientific aspects of the study to include volunteer care, data analysis,  
3332 interpretation and manuscript preparation; continuing review and final study reports  
3333 and publication. AIs will liaise with study personnel from the different organizations  
3334 listed as well as local authorities.

3335

3336 The Associate Laboratory Investigators will be responsible for multiple aspects of  
3337 laboratory analysis during or arising from the study to include depending on their  
3338 respective disciplines: method development; assay design; development of standard  
3339 operating procedures; storage and shipment of samples (where required); data  
3340 analysis and interpretation; manuscript preparation; supervision and monitoring  
3341 technical staff in the conduct of procedures based on levels of established training  
3342 and expertise.

3343

3344 Clinical and Laboratory Research Coordinators will be responsible for coordinating  
3345 procedures in the field and laboratory to include informed consent, screening and  
3346 enrollment; study procedures including SOP/SSP instruction and adherence;  
3347 coordinating the conduct of laboratory procedures; in addition to other duties as  
3348 assigned by the investigators for which they are qualified.

3349

3350 If military volunteers are screened for the study, an ombudsman independent of the  
3351 study team will serve as independent advocates for subject welfare, and be present  
3352 during informed consent sessions. Ombudsmen will also serve as witnesses during  
3353 the informed consent process. They will also be available to subjects by telephone  
3354 and/or on request to communicate questions or concerns to the investigative team.  
3355 One or more ombudsmen will be selected from the civilian community or from the  
3356 RCAF as long as they are outside the chain of command of subjects being recruited.  
3357 In cases of military ombudsmen, they will have sufficient rank and authority to permit  
3358 an independent unbiased determination of subject welfare. For issues that cannot  
3359 be resolved by the investigators, the ombudsmen will report the matter to the  
3360 research monitor.

3361

3362 The research monitor will be responsible to ensure that the monitoring of study  
3363 volunteers from a medical perspective has been done appropriately, to review and  
3364 report all serious and unexpected adverse events, and to verify that medical care is  
3365 provided for any such events should they occur and the events is reported to the  
3366 IRBs.

3367



3368 The Clinical Study Monitor will be responsible for regular monitoring of data  
3369 collection and procedures to ensure that the human volunteer protections, study  
3370 procedures, laboratory, and data collection processes are of high quality and meet  
3371 GCP/ICH and regulatory guidelines; and correspond with IRBs as required.  
3372

3373 Consultants may assist the study team with protocol design, data analysis,  
3374 interpretation and manuscript review and preparation. Consultants will not have  
3375 contact with volunteers or their individually identifiable information. Consultant  
3376 laboratory investigators from outside institutions may analyze de-identified study  
3377 specimens which are labeled with subject ID; no subject identifiable information will  
3378 be provided. In each case, performing laboratory consultants will obtain permission  
3379 from their respective IRBs and provide this to the IRBs of record.  
3380

### 3381 **10.11 Responsibilities of the Research Monitor**

3382  
3383 In accordance with the DoD Directive (DoDD) 3216.02, all studies determined to be  
3384 greater than minimal risk [as defined by 32 CFR 219.102(i)] require an independent  
3385 DoD research monitor. The name of the research monitor is included in the protocol  
3386 and the curriculum vita has been provided. Note that the DOD definition of a  
3387 research monitor differs from the industry definition.  
3388

3389 The research monitor for this study is a qualified physician, other than the Principal  
3390 Investigator, not associated with the protocol, who is able to provide medical care to  
3391 research volunteers for conditions that may arise during the conduct of the study,  
3392 and who will monitor the volunteers during the conduct of the study. Research  
3393 monitors shall promptly report discrepancies or problems to the IRB. They shall have  
3394 the authority to stop a research study in progress, remove individual subjects from a  
3395 study, and take whatever steps are necessary to protect the safety and well-being of  
3396 research subjects until the IRB can assess the research monitor's report. The  
3397 WRAIR IRB is responsible for ensuring that the individual is appropriately qualified to  
3398 serve in this role.  
3399

3400 The research monitor is required to review all unanticipated problems involving risk  
3401 to subjects or others, serious adverse events and all subject deaths associated with  
3402 the protocol and provide an unbiased written report of the event. At a minimum, the  
3403 research monitor must comment on the outcomes of the event or problem and in  
3404 case of a serious adverse event or death, comment on the relationship to  
3405 participation in the study. The research monitor must also indicate whether he/she  
3406 concurs with the details of the report provided by the principal investigator. Reports  
3407 for events determined by either the investigator or research monitor to be possibly or  
3408 definitely related to participation and reports of events resulting in death must be  
3409 promptly forwarded to the USAMRMC ORP HRPO.



## References (listed in order of citation)

- 3410  
3411  
3412  
3413  
3414  
3415  
3416  
3417  
3418  
3419  
3420  
3421  
3422  
3423  
3424  
3425  
3426  
3427  
3428  
3429  
3430  
3431  
3432  
3433  
3434  
3435  
3436  
3437  
3438  
3439  
3440  
3441  
3442  
3443  
3444  
3445  
3446  
3447  
3448  
3449  
3450  
3451  
3452  
3453  
3454  
3455
1. Wongsrichanalala C, Meshnick SR, Declining Artesunate-Mefloquine Efficacy against *Falciparum* Malaria on the Cambodia–Thailand Border. *Emerg Infect Dis.* 2008; 14(5): 716–719.
  2. Noedl H, Se Y, Schaecher K, et al. Artemisinin Resistance in Cambodia 1 (ARC1) Study Consortium, Evidence of artemisinin-resistant malaria in western Cambodia. *N Engl J Med.* 2008;359(24): 2619-20.
  3. Wongsrichanalai, C, Sirichaisinthop, J, Karwacki, JJ, Congpuong, K, Miller, et al, Drug resistant malaria on the Thai-Myanmar and Thai-Cambodian borders. *S Asian J Trop Med Pub Heal.* 2001;(32): 41-49.
  4. Wongsrichanalai C, Pickard AL, Wernsdorfer WH, and Meshnick SR, Epidemiology of drug-resistant malaria. *Lancet Infect Dis.* 2002;(2): 209-218.
  5. Hyde JE, Mechanisms of resistance of *Plasmodium falciparum* to antimalarial drugs. *Microbes Infect.* 2002;(4): 165-174.
  6. Price RN, and Nosten F, Drug resistant falciparum malaria: clinical consequences and strategies for prevention. *Drug Resist Update.* 2001;(4): 187-196.
  7. Bloland PB, Lackritz EM, Kazembe PN, Were JB, Steketee R, and Campbell CC Beyond chloroquine: implications of drug resistance for evaluating malaria therapy efficacy and treatment policy in Africa. *J Infect Dis.* 1993;(167): 932-937.
  8. Shretta R, Omumbo, J, Rapuoda B, and Snow RW, Using evidence to change antimalarial drug policy in Kenya. *Trop Med Int Health.* 2000;(5): 755-764.
  9. Omar SA, Adagu, IS, Gump, DW, Ndaru NP, and Warhurst DC, *Plasmodium falciparum* in Kenya: high prevalence of drug-resistance-associated polymorphisms in hospital admissions with severe malaria in an epidemic area. *Ann Trop Med Parasitol.* 2001;(95): 661-669.
  10. Mberu EK, Mosobo MK, Nzila AM, Kokwaro GO, Sibley CH, and Watkins WM, The changing in vitro susceptibility pattern to pyrimethamine/sulfadoxine in *Plasmodium falciparum* field isolates from Kilifi, Kenya. *Am J Trop Med Hyg.* 2000;(62): 396-401.
  11. Khan B, Omar S, Kanyara JN, Warren-Perry M, Nyalwidhe J, Peterson DS, et al, Antifolate drug resistance and point mutations in *Plasmodium falciparum* in Kenya. *Trans R Soc Trop Med Hyg.* 1997;(91): 456-460.



- 3456 12. Vijaykadga S, Rojanawatsirivej C, Cholpol S, Phoungmanee D, Nakavej A, et  
3457 al, In vivo sensitivity monitoring of mefloquine monotherapy and artesunate-  
3458 mefloquine combinations for the treatment of uncomplicated falciparum  
3459 malaria in Thailand in 2003. *Trop Med Int Health*. 2006;11(2):211-9.  
3460
- 3461 13. Bethell D, Se Y, Lon C, Tyner S, Saunders S, Sriwichai S, Darapiseth S, et al,  
3462 Artesunate Dose Escalation for the Treatment of Uncomplicated Malaria in a  
3463 Region of Reported Artemisinin Resistance: A Randomized Clinic Trial. *PLoS*  
3464 *One*. 2011; 6(5): e19283.  
3465
- 3466 14. Hung TY, Davis TM, Ilett KF, Karunajeewa H, Hewitt S, et al, Population  
3467 pharmacokinetics of piperazine in adults and children with uncomplicated  
3468 falciparum or vivax malaria. *Br J Clin Pharmacol*. 2004;57:253–262.  
3469
- 3470 15. Tarning J, Ashley EA, Lindegardh N, Stepniewska K, Phaiphun L, et al,  
3471 Population pharmacokinetics of piperazine after two different treatment  
3472 regimens of dihydroartemisinin-piperazine in patients with acute  
3473 uncomplicated *Plasmodium falciparum* malaria in Thailand. *Antimicrob Agents*  
3474 *Chemother*. 2008;52:1052–61.  
3475
- 3476 16. Zwang J et al. Safety and Efficacy of Dihydroartemisinin-Piperazine in  
3477 Falciparum Malaria: A Prospective Multi-Centre Individual Patient Data  
3478 Analysis. *PLoS One*. 2009; 4(7): e6358.  
3479
- 3480 17. Janssens B , van Herp M et al., A randomized open study to assess the  
3481 efficacy and tolerability of dihydroartemisinin–piperazine for the treatment of  
3482 uncomplicated falciparum malaria in Cambodia. *Trop Med & Intl Health*.  
3483 2007; 12 (2): 251 – 259.  
3484
- 3485 18. MMV Press Release 2009 - [http://www.asia-lifesciences.com/press-174-](http://www.asia-lifesciences.com/press-174-sigmatau-industriefarmaceuticheriunite-emea-novelantimalarial-press6.html)  
3486 [sigmatau-industriefarmaceuticheriunite-emea-novelantimalarial-press6.html](http://www.asia-lifesciences.com/press-174-sigmatau-industriefarmaceuticheriunite-emea-novelantimalarial-press6.html)  
3487
- 3488 19. Mytton OT, Ashley EA, et al. Short Report: Electrocardiographic Safety  
3489 Evaluation of Dihydroartemisinin–Piperazine in the Treatment of  
3490 Uncomplicated falciparum Malaria. *Am J Trop Med Hyg*. 2007; 77(3): 447–  
3491 450  
3492
- 3493 20. World Health Organization (WHO), Guidelines for the Treatment of Malaria  
3494 2<sup>nd</sup> ed., 2010.  
3495
- 3496 21. Bousema T and Drakeley C, Epidemiology and Infectivity of *Plasmodium*  
3497 *falciparum* and *Plasmodium vivax* Gametocytes in relation to Malaria Control  
3498 and Elimination. *Clin Micro Rev*. 2011; 24(2): 377-410.  
3499





- 3500 22. Coleman RE, Kumpitak C, Ponlawat A, Maneechai N, Phunkitchar V, et al,  
3501 Infectivity of Asymptomatic *Plasmodium*-Infected Human Populations to  
3502 *Anopheles dirus* Mosquitoes in Western Thailand, *J Med Ento.* 2004.  
3503 41(2):201-208.  
3504
- 3505 23. Schneider P, Bousema JT, Gouagna LC, Otieno S, Van de Vegte-Bolmer M,  
3506 et al, Submicroscopic *Plasmodium falciparum* gametocyte densities frequently  
3507 result in mosquito infection. *Am J Trop Med Hyg.* 2007; 76(3): 470-474.  
3508
- 3509 24. Bousema T, Schneider P, Gouagna LC, Drakeley CJ, Tostmann A, Houben  
3510 R, et al, Moderate Effect of Artemisinin-Based Combination Therapy on  
3511 Transmission of *Plasmodium falciparum*. *J Infec Dis.* 2006;193: 1151-1159.  
3512
- 3513 25. Shekalaghe SA, Bousema JT, Kunei KK, Lushino P, Masokoto A, et al,  
3514 Submicroscopic *Plasmodium falciparum* gametocyte carriage is common in  
3515 an area of low and seasonal transmission in Tanzania. *Trop Med Intl Heal.*  
3516 2007; 12(4): 547-553.  
3517
- 3518 26. Okell LC, Ghani AC, Lyons E, Drakeley C, Submicroscopic Infection in  
3519 *Plasmodium falciparum*-Endemic Populations: A Systematic Review and  
3520 Meta-Analysis. *J Infec Dis.* 2009;200: 1509-1517.  
3521
- 3522 27. Targett G, Drakeley C, Jawara M, von Seidlein L, Coleman R, Deen J et al,  
3523 Artesunate Reduces but Dose Not Prevent Posttreatment Transmission of  
3524 *Plasmodium falciparum* to *Anopheles gambiae*. *J Infec Dis.* 2001; 183:1254-  
3525 1259.  
3526
- 3527 28. Robert V, Awono-Ambene HP, Le Hesran JY, Trape JF, Gametocytemia and  
3528 infectivity to mosquitoes of patients with uncomplicated *Plasmodium*  
3529 *falciparum* malaria attacks treated with chloroquine or sulfadoxine plus  
3530 pyrimethamine. *Am J Trop Med Hyg.* 2000; 62(2): 210-216  
3531
- 3532 29. Dunyo S, Milligan P, Edwards T, Sutherland C, Targett G, Pinder M,  
3533 Gametocytemia after Drug Treatment of Asymptomatic *Plasmodium*  
3534 *falciparum*. *PLoS Clin Trials.* 2006; 1(4): e20.  
3535
- 3536 30. Pukrittayakamee S, Chotivanich K, Chantira A, Clemens R, Looareesuwan S,  
3537 et al, Activities of Artesunate and primaquine against Asexual- and Sexual-  
3538 Stage Parasites in *Falciparum* Malaria. *Anti Agen Chemo.* 2004; 48(4): 1329-  
3539 1334.  
3540
- 3541 31. Chotivanich K, Sattabongkot J, Udomsangpetch R, Looareesuwan S, et al,  
3542 Transmission-Blocking Activities of Quinine, Primaquine, and Artesunate.  
3543 *Antimicro Agen Chemo.* 2006; 50(6): 1927-1930.  
3544



- 3545 32. Shekalaghe S, Drakeley C, Gosling R, Ndarro A, van Meegeren M, et al,  
3546 Primaquine Clears Submicroscopic *Plasmodium falciparum* Gametocytes that  
3547 Persist after Treatment with Sulphadoxine-Pyrimethamine and Artesunate.  
3548 *PLoS One* 2006; 2(10). e1023.  
3549
- 3550 33. Smithius F, Kyaw MK, Phe O, Win T, Aung PP, Oo APP, Naing AL, Nya MY  
3551 et al, Effectiveness of five artemisinin combination regimens with or without  
3552 primaquine in uncomplicated falciparum malaria: an open-label randomised  
3553 trial. *Lancet*. 2010; 10: 673-681.  
3554
- 3555 34. El-Sayed B, El-Zaki, SE, Babiker H, Gadalla N, Ageep T, Mansour F, et al, A  
3556 Randomized Open-Label Trial of Artesunate-Sulfadoxine-Pyrimethamine with  
3557 or without Primaquine for Elimination of Sub-Microscopic *P. falciparum*  
3558 Parasitemia and Gametocyte Carriage in Eastern Sudan. *PLoS One*. 2007;  
3559 2(12): e1311.  
3560
- 3561 35. Barnes KI, Little F, Mabuza A, Mngomezulu N, Govere J, Durrheim D et al,  
3562 Increased Gametocytemia after Treatment: An Early Parasitological Indicator  
3563 of Emerging Sulfadoxine-Pyrimethamine Resistance in Falciparum Malaria. *J*  
3564 *Infect Dis*. 2008; 197: 1607-1613.  
3565
- 3566 36. Louicharoen C, Nuchprayoon I, G6PD Viangchan (871G>A) is the most  
3567 common G6PD-deficient variant in the Cambodian population. *J Hum*  
3568 *Genetics*, 2005. 50 (9): 448-52.  
3569
- 3570 37. Everett WD, Yoshida A, Pearlman E. Hemoglobin E and glucose-6-  
3571 phosphatase deficiency in the Khmer Air Force (Cambodia). *Am J Trop Med*  
3572 *Hyg*, 1977. 26 (4): 597-601.  
3573
- 3574 38. Alving AS, Johnson CF, et al, Mitigation of the haemolytic effect of primaquine  
3575 and enhancement of its action against exoerythrocytic forms of the Chesson  
3576 strain of *Plasmodium vivax* by intermittent regimens of drug administration: a  
3577 preliminary report. *Bull World Health Organ*. 1960; 22: 621-31.  
3578
- 3579 39. Kyaw MP, Myint O, et al, The use of primaquine in malaria infected patients  
3580 with red cell glucose 6-phosphate dehydrogenase (G6PD) deficiency in  
3581 Myanmar. *S Asian J Trop Med Pub Heal* 1994; 25(4): 710-3.  
3582
- 3583 40. Charoenlarp P, Areekul S, et al, The haemolytic effect of a single dose of 45  
3584 mg of primaquine in G-6-PD deficient Thais. *J Med Assoc Thai*. 1972; 55(11):  
3585 631-8.  
3586
- 3587 41. Ziai M, Amirhakimi GH, et al, Malaria prophylaxis and treatment in G-6-PD  
3588 deficiency. An observation on the toxicity of primaquine and chloroquine. *Clin*  
3589 *Pediatr (Phila)*. 1967; 6(4): 242-3.  
3590



- 3591 42. Reeve PA, Toaliu H, et al, Acute intravascular haemolysis in Vanuatu  
3592 following a single dose of primaquine in individuals with glucose-6-phosphate  
3593 dehydrogenase deficiency. *J Trop Med Hyg.* 1992;95(5): 349-51.  
3594
- 3595 43. Krudsood S et al, Dose ranging studies of new artemisinin-piperaquine fixed  
3596 combinations compared to standard regimens of artemisinin combination  
3597 therapies for acute, uncomplicated falciparum malaria. 2007; 38 (6): 971-978  
3598
- 3599 44. CIA The World Factbook 2010, [https://www.cia.gov/library/publications/the-](https://www.cia.gov/library/publications/the-world-factbook/geos/cb.html)  
3600 [world-factbook/geos/cb.html](https://www.cia.gov/library/publications/the-world-factbook/geos/cb.html)  
3601
- 3602 45. Liu C et al. Pharmacokinetics of Piperaquine after single and multiple oral  
3603 Administrations in Healthy Volunteers. *Yakugaku Zasshi.* 2007;127(10): 1709-  
3604 1714  
3605
- 3606 46. Bangchang KN, Karbwang J, & Back DJ, Primaquine metabolism by human  
3607 liver microsomes: effect of other antimalarial drugs. *Biochem Pharmacol.*  
3608 1992; 44:587-590.  
3609
- 3610 47. Barradell LB and Fitton A, Artesunate: a review of its pharmacology and  
3611 therapeutic efficacy in the treatment of malaria. *Drugs.* 1995a; 50:714-771  
3612
- 3613 48. Trager W, Jensen JB, Continuous culture of *Plasmodium falciparum*: its  
3614 impact on malaria research. *Int J Parasitol.* 1997; 27 (9): 989–1006.  
3615
- 3616 49. Anderson TJC, Su XZ, Bockarie M, Lagoh M, Day KP, Twelve microsatellite  
3617 markers for characterization of *Plasmodium falciparum* from finger-prick blood  
3618 samples. *Parasit.* 1999;119: 113-125  
3619
- 3620 50. Su XZ, Ferdig MT, Huang Y, Huynh CQ, Liu A, You J, Wootton JC, Wellem  
3621 TE, A Genetic Map and Recombination Parameters of the Human Malaria  
3622 Parasite *Plasmodium falciparum*. *Science.* 1999;286(5443): 1351-1353  
3623
- 3624 51. Vinayak S, Alam MT, Mixson-Hayden T, McCollum AM, Sem R, et al, Origin  
3625 and Evolution of Sulfadoxine Resistant *Plasmodium falciparum*. *PLoS Pathog.*  
3626 2010; 6(3): e1000830.  
3627
- 3628 52. Noedl H, Se Y, Sriwichai S, Schaecher K, Teja-isavadharm P, Smith B, et al,  
3629 Artemisinin Resistance in Cambodia: A Clinical Trial Designed to Address an  
3630 Emerging Problem in Southeast Asia. *Clin Inf Dis.* 2010; 51(11): e82-89.  
3631
- 3632 53. Noedl H, Wernsdorfer WH, Miller RS and Wongsrichanalai C, Histidine rich  
3633 protein II, a novel approach to anti-malarial drug susceptibility testing.  
3634 *Antimicrob Agent Chemo.* 2002; 46(6): 1658-64.  
3635



- 3636 54. Noedl, H., Teja-Isavadharm, P. and Miller R.S. Nonisotopic, semi-automated  
3637 Plasmodium falciparum bioassay for measurement of antimalarial drug levels  
3638 in serum or plasma. *Antimicrob Agents Chemother*, 2004. 48: p. 4485-4487.  
3639  
3640 55. Bland JM, Altman DG, Comparing methods of measurement: why plotting  
3641 difference against standard method is misleading. *Lancet*.  
3642 1995;346(8982):1085-7.  
3643  
3644

## 3645 **Appendices**

- 3646  
3647 Appendix A: Cambodia National Malaria Program Treatment Guidelines  
3648 (attachment)  
3649  
3650 Appendix B: Dihydroartemisinin-piperaquine package insert (attachment)  
3651  
3652 Appendix C: Primaquine package insert (attachment)  
3653  
3654 Appendix D: Statistical Analysis Plan (World-wide Antimalarial Research Network  
3655 attachment)  
3656  
3657 Appendix E. Recent publicly available information from Sigma-tau pharmaceuticals –  
3658 package insert and labeling information describing cardiac safety issues with DHA-  
3659 piperaquine (Eurartesim) (attachment)  
3660  
3661 Appendix F. DSMB Charter  
3662  
3663  
3664  
3665  
3666  
3667  
3668  
3669  
3670  
3671  
3672  
3673  
3674  
3675  
3676  
3677  
3678  
3679  
3680
